# Supplementary material for: Causal association between micronutrients and oral diseases: a bidirectional two-sample Mendelian randomization study
Source: Research Square preprint supplement (doi:10.21203/rs.3.rs-6332891/v1), 2025-05-09
Supplement: Supplementary file 1 [file 42002182dbde80a713754497.xlsx]

## Sheet: Supplementary Table S1
Supplementary Table S1. Summary information of GWAS data used in the study.
Exposure/outcome	Author/Consortium	Year	Sample size (N)	SNPs	PMID	GWAS ID
Dental caries	Neale lab	2018	361194	10658307	/	ukb-d-K02
Chronic periodontitis	/	2021	198441	16380378	/	finn-b-K11_PERIODON_CHRON
Acute periodontitis	/	2021	195764	16380371	/	finn-b-K11_PERIODON_ACUTE
Diseases of pulp and periapical tissues	/	2021	200749	16380387	/	finn-b-K11_PULP_PERIAPICAL
Impacted teeth	Ben Elsworth	2018	463010	9851867	/	ukb-b-7534
Cleft lip and cleft palate	/	2021	218792	16380466	/	finn-b-Q17_CLEFT_LIP_CLEFT_PALATE
Oral cavity cancer	Burrows	2021	372373	7723107	/	ieu-b-4961
Oropharyngeal cancer	Burrows	2021	372510	8283869	/	ieu-b-4968
Mouth ulcers	Ben Elsworth	2018	461113	9851867	/	ukb-b-6458
Toothache	Ben Elsworth	2018	461113	9851867	/	ukb-b-19191
Loose teeth	Ben Elsworth	2018	461113	9851867	/	ukb-b-12849
Bleeding gums	Ben Elsworth	2018	461113	9851867	/	ukb-b-7872
Painful gums	Ben Elsworth	2018	461113	9851867	/	ukb-b-11161
Vitamin A	/	2023	/	/		GCST90200405
Vitamin B9	/	2021	/	/		GCST90012742
Vitamin B12	Ben Elsworth	2018	64979	9851867	/	ukb-b-19524
Vitamin D	Ben Elsworth	2018	64979	9851867	/	ukb-b-18593
Vitamin E	Ben Elsworth	2018	64979	9851867	/	ukb-b-6888

## Sheet: Supplementary Table S2
Supplementary Table S2. Exposure-related instrumental variables obtained from the literature (P < 5e-8).
Nutrient	SNPs	baseline.allele	effect.allele	chr	Pos1	gene	EAF	beta	se	R2	Fstatistic
betacarotene	rs6564851	T	G	16	81230992	PKD1L2-BCO1	0.39	0.149	0.015	0.025	99
calcium	rs1801725	G	T	3	122284910	CASR	0.15	0.071	0.004	0.0051	315
calcium	rs1570669	A	G	20	54157888	CYP24A1	0.34	0.018	0.003	0.0006	36
calcium	rs1550532	G	C	2	233356202	DGKD	0.31	0.018	0.003	0.0006	36
calcium	rs780094	C	T	2	27518370	GCKR	0.42	0.017	0.003	0.0005	32
calcium	rs7481584	A	G	11	3007859	CARS	0.7	0.018	0.003	0.0006	36
calcium	rs7336933	A	G	13	41984940	DGKH	0.85	0.022	0.004	0.0005	30
calcium	rs10491003	C	T	10	9286688	GATA3	0.09	0.027	0.005	0.0005	29
calcium(UKB)	rs10129874	T	C	14	91864069	TC2N	0.17	0.02549	0.003513	0.0002	53
calcium(UKB)	rs10224210	T	C	7	151716108	PRKAG2	0.72	0.019	0.002912	0.0001	43
calcium(UKB)	rs1035798	G	A	6	32183445	AGER	0.2	0.01918	0.003283	0.0001	34
calcium(UKB)	rs1036332	A	C	1	199043349	LINC01221	0.26	0.02198	0.002993	0.0002	54
calcium(UKB)	rs10444863	C	T	15	78066495	TBC1D2B	0.21	0.0197	0.003227	0.0001	37
calcium(UKB)	rs1048603	G	A	2	233485841	USP40	0.31	0.02026	0.002843	0.0002	51
calcium(UKB)	rs1064608	C	G	11	47618877	MTCH2	0.65	0.02116	0.002747	0.0002	59
calcium(UKB)	rs10739679	A	G	9	126532192	AL356309.1	0.36	0.03373	0.002742	0.0005	151
calcium(UKB)	rs10754439	G	T	1	116286011	U3	0.58	0.01464	0.002662	0.0001	30
calcium(UKB)	rs10898822	G	A	11	72120471	FOLR3	0.51	0.01478	0.00263	0.0001	32
calcium(UKB)	rs10917386	C	T	1	23472508	ASAP3	0.31	0.0193	0.002826	0.0001	47
calcium(UKB)	rs11078597	T	C	17	1715069	WDR81	0.81	0.05183	0.003357	0.0008	238
calcium(UKB)	rs11117777	T	C	1	217151674	ESRRG	0.16	0.02178	0.003611	0.0001	36
calcium(UKB)	rs11122848	G	A	2	121186398	AC079988.3	0.47	0.01482	0.002626	0.0001	32
calcium(UKB)	rs11187838	A	G	10	94278929	PLCE1	0.43	0.01875	0.002645	0.0002	50
calcium(UKB)	rs11218725	A	G	11	122638529	UBASH3B	0.62	0.01519	0.002708	0.0001	31
calcium(UKB)	rs112371897	C	T	10	9279917	LINC00709	0.91	0.07111	0.004496	0.0008	250
calcium(UKB)	rs113911787	G	A	1	51604942	OSBPL9	0.77	0.01727	0.003148	0.0001	30
calcium(UKB)	rs1150781	G	C	6	34246545	C6orf1	0.91	0.04364	0.004589	0.0003	90
calcium(UKB)	rs11538349	T	C	7	65956884	VKORC1L1	0.1	0.02984	0.004424	0.0001	45
calcium(UKB)	rs11577605	G	A	1	21319274	ECE1	0.12	0.03404	0.00403	0.0002	71
calcium(UKB)	rs11584885	A	G	1	1164057	MIR200B	0.28	0.02628	0.002974	0.0002	78
calcium(UKB)	rs115946508	C	A	7	150800408	TMEM176B	0.89	0.03597	0.004189	0.0002	74
calcium(UKB)	rs116004654	C	T	3	121616610	FBXO40	0.94	0.0588	0.005722	0.0003	106
calcium(UKB)	rs116140498	T	C	3	122127066	PARP15	0.95	0.04993	0.005896	0.0002	72
calcium(UKB)	rs11629876	T	C	15	96123173	NR2F-S1	0.33	0.01847	0.002778	0.0001	44
calcium(UKB)	rs11632520	T	C	15	49066111	SECISBP2L	0.17	0.02902	0.003495	0.0002	69
calcium(UKB)	rs11687510	T	C	2	97718216	ZAP70	0.36	0.01782	0.002768	0.0001	41
calcium(UKB)	rs11730491	G	T	4	26172941	RBPJ	0.83	0.0222	0.00353	0.0001	40
calcium(UKB)	rs11746728	T	C	5	174623803	RP1-67A15.3	0.65	0.0161	0.00275	0.0001	34
calcium(UKB)	rs11753096	T	C	6	136941063	AL356739.1	0.46	0.01896	0.002639	0.0002	52
calcium(UKB)	rs1177274	G	T	2	61141397	C2orf74	0.56	0.02812	0.002636	0.0004	114
calcium(UKB)	rs11777067	C	T	8	38441129	FGFR1	0.77	0.02043	0.003092	0.0001	44
calcium(UKB)	rs11792928	T	C	9	126639271	LMX1B	0.29	0.01688	0.002891	0.0001	34
calcium(UKB)	rs12212449	T	C	6	134196549	SGK1	0.61	0.03087	0.002677	0.0004	133
calcium(UKB)	rs12294466	C	T	11	118918948	BCL9L	0.92	0.02853	0.004878	0.0001	34
calcium(UKB)	rs12339541	A	C	9	94876644	C9orf3	0.06	0.05591	0.005341	0.0003	110
calcium(UKB)	rs12378991	A	G	9	74857150	TRPM6	0.08	0.0362	0.004871	0.0002	55
calcium(UKB)	rs12519940	T	C	5	134568907	JADE2	0.28	0.02716	0.002943	0.0003	85
calcium(UKB)	rs12534476	A	G	7	150903251	KCNH2	0.17	0.02131	0.003495	0.0001	37
calcium(UKB)	rs12583851	C	T	13	109852617	RP1-0E6.1	0.75	0.02237	0.003027	0.0002	55
calcium(UKB)	rs1260326	C	T	2	27508073	GCKR	0.61	0.04724	0.002686	0.001	309
calcium(UKB)	rs12613807	T	C	2	190479037	MFSD6	0.56	0.01798	0.002639	0.0001	46
calcium(UKB)	rs1262217	G	A	10	63723502	RP1-70M17.1	0.17	0.02018	0.003451	0.0001	34
calcium(UKB)	rs12675477	C	T	8	71463093	RP1-102P16.1	0.73	0.01665	0.002947	0.0001	32
calcium(UKB)	rs12794834	T	C	11	34600457	EHF	0.52	0.01454	0.002627	0.0001	31
calcium(UKB)	rs12917235	T	C	15	69309171	PAQR5	0.37	0.027	0.002711	0.0003	99
calcium(UKB)	rs12918968	C	A	16	88454044	ZFPM1	0.44	0.03243	0.002639	0.0005	151
calcium(UKB)	rs12922549	T	C	16	54417835	LINC02140	0.24	0.02303	0.003145	0.0002	54
calcium(UKB)	rs12932755	G	A	16	81532542	CMIP	0.51	0.01689	0.002641	0.0001	41
calcium(UKB)	rs12933677	C	T	16	83950170	OSGIN1	0.47	0.01528	0.002638	0.0001	34
calcium(UKB)	rs12974855	G	A	19	51685899	SPACA6-S	0.86	0.02589	0.003859	0.0001	45
calcium(UKB)	rs12998379	A	G	2	10023795	RP1-54F7.1	0.19	0.02565	0.003334	0.0002	59
calcium(UKB)	rs1303	G	T	14	94378506	SERPINA1	0.74	0.02082	0.00301	0.0002	48
calcium(UKB)	rs13107325	T	C	4	102267552	SLC39A8	0.93	0.05938	0.004988	0.0005	142
calcium(UKB)	rs13108218	G	A	4	3442204	HGFAC	0.62	0.03916	0.002716	0.0007	208
calcium(UKB)	rs13254847	T	C	8	22085329	FAM160B2	0.22	0.02257	0.003182	0.0002	50
calcium(UKB)	rs13325	A	G	4	3518035	LRPAP1	0.17	0.02505	0.003538	0.0002	50
calcium(UKB)	rs13389219	T	C	2	164672366	COBLL1	0.39	0.01636	0.002679	0.0001	37
calcium(UKB)	rs1354034	C	T	3	56815721	ARHGEF3	0.6	0.01946	0.00267	0.0002	53
calcium(UKB)	rs1476698	G	A	2	241357034	FARP2	0.37	0.02262	0.002714	0.0002	69
calcium(UKB)	rs1495747	T	C	8	18405351	NAT2	0.28	0.01856	0.00293	0.0001	40
calcium(UKB)	rs1604081	T	C	5	131841209	MEIKIN	0.14	0.02204	0.003819	0.0001	33
calcium(UKB)	rs1621676	A	G	1	219849174	SLC30A10	0.25	0.01672	0.003044	0.0001	30
calcium(UKB)	rs1657502	G	T	2	96129869	ASTL	0.62	0.0196	0.002704	0.0002	53
calcium(UKB)	rs16844401	G	A	4	3447925	HGFAC	0.07	0.05063	0.005302	0.0003	91
calcium(UKB)	rs1688131	C	T	19	3125274	GNA11	0.71	0.03644	0.002931	0.0005	155
calcium(UKB)	rs17164683	T	C	7	92657666	CDK6	0.27	0.01995	0.002963	0.0001	45
calcium(UKB)	rs1749849	T	C	10	79240112	ZMIZ1	0.42	0.0211	0.002666	0.0002	63
calcium(UKB)	rs17668044	G	A	18	62535994	ZCCHC2	0.71	0.01804	0.002895	0.0001	39
calcium(UKB)	rs17774672	A	G	10	49299664	C10orf71	0.16	0.02521	0.003587	0.0002	49
calcium(UKB)	rs1780316	T	C	1	21563142	ALPL	0.06	0.03726	0.00551	0.0001	46
calcium(UKB)	rs1801282	G	C	3	12351626	PPARG	0.88	0.0386	0.004021	0.0003	92
calcium(UKB)	rs1801725	G	T	3	122284910	CASR	0.13	0.19108	0.003895	0.0076	2407
calcium(UKB)	rs1827293	A	G	1	21468895	NBPF3	0.46	0.02361	0.002632	0.0003	80
calcium(UKB)	rs1858800	C	T	16	72990377	ZFHX3	0.65	0.0318	0.002769	0.0004	132
calcium(UKB)	rs1875272	A	G	3	122577791	PARP15	0.75	0.02611	0.003143	0.0002	69
calcium(UKB)	rs2004315	C	T	11	13486837	RP1-5D14.2	0.38	0.03337	0.002705	0.0005	152
calcium(UKB)	rs2070179	T	C	3	121634407	HCLS1	0.24	0.01694	0.00307	0.0001	30
calcium(UKB)	rs2100431	C	A	15	60478651	ICE2	0.3	0.01701	0.002868	0.0001	35
calcium(UKB)	rs218671	T	G	17	6701389	SLC13A5	0.55	0.01637	0.002649	0.0001	38
calcium(UKB)	rs2245715	G	A	15	43525854	MAP1A	0.1	0.02409	0.004403	0.0001	30
calcium(UKB)	rs2288920	T	G	19	49588541	PRRG2	0.83	0.02609	0.003513	0.0002	55
calcium(UKB)	rs2298615	T	C	11	65584591	EHBP1L1	0.23	0.01883	0.003101	0.0001	37
calcium(UKB)	rs2303914	T	G	2	9843557	TAF1B	0.52	0.02007	0.002733	0.0002	54
calcium(UKB)	rs2343592	G	A	8	105560042	ZFPM2	0.27	0.02344	0.002966	0.0002	62
calcium(UKB)	rs2419886	T	C	10	114081882	RNU-09P	0.26	0.02291	0.003014	0.0002	58
calcium(UKB)	rs2448036	T	G	12	12052368	BCL2L14	0.11	0.02865	0.004345	0.0001	43
calcium(UKB)	rs2520265	G	A	7	107540786	COG5	0.29	0.02182	0.002899	0.0002	57
calcium(UKB)	rs2546056	C	T	19	34887821	LINC00904	0.86	0.02618	0.003832	0.0001	47
calcium(UKB)	rs2585135	G	A	8	142732775	THEM6	0.54	0.01476	0.002623	0.0001	32
calcium(UKB)	rs2636695	T	G	4	105374928	PPA2	0.77	0.02078	0.003121	0.0001	44
calcium(UKB)	rs2681417	A	G	3	122106350	CD86	0.93	0.03731	0.005109	0.0002	53
calcium(UKB)	rs2785171	A	G	11	35141915	CD44	0.61	0.01517	0.002693	0.0001	32
calcium(UKB)	rs2807880	T	C	1	220869661	HL-S1	0.18	0.02044	0.003402	0.0001	36
calcium(UKB)	rs2855799	A	G	11	128867799	KCNJ1	0.81	0.0184	0.003352	0.0001	30
calcium(UKB)	rs28616221	G	A	19	35063575	HPN	0.82	0.04623	0.003401	0.0006	185
calcium(UKB)	rs2918247	G	A	12	3949064	RP1-64D1.1	0.23	0.01748	0.003136	0.0001	31
calcium(UKB)	rs3026445	C	T	12	110285398	ATP2A2	0.37	0.01815	0.002719	0.0001	45
calcium(UKB)	rs302655	T	G	11	88158219	RAB38	0.43	0.02003	0.002643	0.0002	57
calcium(UKB)	rs308981	T	C	14	60088797	PCNX4	0.12	0.02254	0.004032	0.0001	31
calcium(UKB)	rs3130618	A	C	6	31664357	GPANK1	0.8	0.02082	0.003291	0.0001	40
calcium(UKB)	rs3217795	G	A	12	4276898	CCND2	0.09	0.02519	0.004618	0.0001	30
calcium(UKB)	rs34010237	G	A	19	49509317	FCGRT	0.84	0.03047	0.00357	0.0002	73
calcium(UKB)	rs34372369	G	A	7	143395176	EPHA1	0.05	0.04413	0.005956	0.0002	55
calcium(UKB)	rs34667500	G	A	3	107467721	LINC01990	0.88	0.03805	0.004022	0.0003	89
calcium(UKB)	rs34895054	G	C	15	48992804	SECISBP2L	0.26	0.01869	0.003002	0.0001	39
calcium(UKB)	rs35320690	T	C	3	136213652	KRT18P35	0.72	0.02619	0.002936	0.0003	80
calcium(UKB)	rs35587941	G	T	19	2983177	TLE6	0.57	0.01524	0.002684	0.0001	32
calcium(UKB)	rs35674179	A	C	3	121695370	GOLGB1	0.9	0.02591	0.004319	0.0001	36
calcium(UKB)	rs35758545	T	C	1	178542789	C1ORF220	0.35	0.0163	0.00275	0.0001	35
calcium(UKB)	rs35852840	C	A	14	64129045	SYNE2	0.94	0.03052	0.005586	0.0001	30
calcium(UKB)	rs36086195	C	T	1	16184399	ARHGEF1-S1	0.42	0.01844	0.002656	0.0002	48
calcium(UKB)	rs36104352	A	C	8	23520091	SLC25A37	0.88	0.03006	0.00402	0.0002	56
calcium(UKB)	rs3740690	C	T	11	47167041	ARFGAP2	0.44	0.0148	0.002634	0.0001	32
calcium(UKB)	rs3741628	T	G	12	48654955	KANSL2	0.57	0.02193	0.002649	0.0002	69
calcium(UKB)	rs3794695	C	T	16	72063928	HPR	0.81	0.01908	0.003348	0.0001	32
calcium(UKB)	rs3798236	C	T	6	115988486	FRK	0.37	0.01671	0.002718	0.0001	38
calcium(UKB)	rs3931841	G	A	2	120283738	RALB	0.68	0.02679	0.002823	0.0003	90
calcium(UKB)	rs41264630	G	A	1	149914248	SV2A	0.92	0.02714	0.004794	0.0001	32
calcium(UKB)	rs413948	A	G	5	177029038	ZNF346	0.87	0.02215	0.003979	0.0001	31
calcium(UKB)	rs4376797	G	A	1	217248089	ESRRG	0.65	0.02575	0.002741	0.0003	88
calcium(UKB)	rs4594967	G	A	6	130045016	L3MBTL3	0.67	0.02323	0.002787	0.0002	69
calcium(UKB)	rs4633480	G	A	11	68845899	CPT1A	0.44	0.0209	0.002639	0.0002	63
calcium(UKB)	rs4758621	G	A	11	2988410	NAP1L4	0.31	0.02762	0.002842	0.0003	94
calcium(UKB)	rs4763297	A	C	12	12736355	APOLD1	0.57	0.01543	0.002651	0.0001	34
calcium(UKB)	rs4790310	T	C	17	2063626	SMG6	0.57	0.02239	0.002654	0.0002	71
calcium(UKB)	rs4805129	C	T	19	35528620	SBSN	0.63	0.01995	0.002708	0.0002	54
calcium(UKB)	rs4915444	A	C	1	200485212	RP1-21P12.1	0.4	0.01695	0.002679	0.0001	40
calcium(UKB)	rs4917	T	C	3	186619924	AHSG	0.36	0.03757	0.002733	0.0006	189
calcium(UKB)	rs4925104	T	G	17	17721871	RAI1	0.47	0.0176	0.002621	0.0001	45
calcium(UKB)	rs4976647	A	C	5	177361621	RGS14	0.67	0.01799	0.002784	0.0001	42
calcium(UKB)	rs498490	T	C	10	8076714	GATA3	0.16	0.03318	0.003548	0.0003	87
calcium(UKB)	rs507666	A	G	9	133273983	ABO	0.19	0.02125	0.003364	0.0001	40
calcium(UKB)	rs55633823	T	C	14	105488368	CRIP1	0.75	0.02176	0.003074	0.0002	50
calcium(UKB)	rs55754498	T	C	15	60591195	RORA	0.05	0.03263	0.005844	0.0001	31
calcium(UKB)	rs56230940	C	T	11	119168319	NLRX1	0.93	0.03146	0.005002	0.0001	40
calcium(UKB)	rs56252617	C	T	16	72949159	ZFHX3	0.6	0.01465	0.002669	0.0001	30
calcium(UKB)	rs56313825	G	A	19	29809934	CCNE1	0.6	0.01514	0.002671	0.0001	32
calcium(UKB)	rs56397046	T	C	16	89653547	CHMP1A	0.33	0.02126	0.002784	0.0002	58
calcium(UKB)	rs5751350	G	A	22	42721589	A4GALT	0.67	0.01568	0.002783	0.0001	32
calcium(UKB)	rs57564578	A	G	10	98402882	PYROXD2	0.07	0.03349	0.005188	0.0001	42
calcium(UKB)	rs58673639	T	G	2	113746053	SLC35F5	0.79	0.01849	0.003184	0.0001	34
calcium(UKB)	rs6013892	C	A	20	54107677	RP1-79L11.3	0.93	0.03221	0.005207	0.0001	38
calcium(UKB)	rs60155540	A	G	15	50711495	SPPL2A	0.2	0.02083	0.003295	0.0001	40
calcium(UKB)	rs611150	C	T	12	3895586	RP1-64D1.1	0.82	0.02227	0.003436	0.0001	42
calcium(UKB)	rs6118	T	C	14	94587526	SERPINA5	0.9	0.02985	0.004374	0.0001	47
calcium(UKB)	rs61594679	T	C	8	62997711	NKAIN3	0.29	0.01814	0.002905	0.0001	39
calcium(UKB)	rs61649210	A	G	8	21919240	XPO7	0.45	0.01505	0.002649	0.0001	32
calcium(UKB)	rs61770531	T	C	1	67819362	GNG12	0.91	0.03607	0.004645	0.0002	60
calcium(UKB)	rs61779309	C	T	1	39474827	MACF1	0.21	0.01972	0.003226	0.0001	37
calcium(UKB)	rs62134669	T	C	2	54541524	SPTBN1	0.85	0.02376	0.00369	0.0001	41
calcium(UKB)	rs62292542	A	G	3	186901226	RPS20P14	0.11	0.03181	0.00417	0.0002	58
calcium(UKB)	rs62362239	T	C	5	73092905	FCHO2	0.67	0.01992	0.002779	0.0002	51
calcium(UKB)	rs62439474	C	T	7	16101500	ISPD	0.7	0.02166	0.002873	0.0002	57
calcium(UKB)	rs6560613	T	C	9	77725471	GNAQ	0.91	0.03361	0.004678	0.0002	52
calcium(UKB)	rs6580981	A	G	12	54329244	COPZ1	0.46	0.01909	0.002638	0.0002	52
calcium(UKB)	rs6590227	T	C	11	126725924	KIRREL3	0.12	0.02547	0.004104	0.0001	39
calcium(UKB)	rs66527777	T	C	6	74147756	RP1-54D15.1	0.17	0.02221	0.00352	0.0001	40
calcium(UKB)	rs6680117	T	C	1	219954395	SLC30A10	0.18	0.02713	0.003441	0.0002	62
calcium(UKB)	rs6719061	T	C	2	232831175	GIGYF2	0.6	0.01924	0.002673	0.0002	52
calcium(UKB)	rs6722613	A	G	2	25316488	DNMT3A	0.57	0.0165	0.002656	0.0001	39
calcium(UKB)	rs6731551	C	T	2	113086976	RNU-180P	0.48	0.01492	0.002621	0.0001	32
calcium(UKB)	rs6734610	A	G	2	113259452	PAX8	0.48	0.02301	0.002619	0.0002	77
calcium(UKB)	rs6741561	T	C	2	96792699	CNNM4	0.39	0.04006	0.002681	0.0007	223
calcium(UKB)	rs681664	T	C	11	126190943	RPUSD4	0.22	0.01804	0.003169	0.0001	32
calcium(UKB)	rs6830950	C	T	4	27014846	STIM2	0.27	0.01679	0.002966	0.0001	32
calcium(UKB)	rs6841429	A	C	4	40563452	RBM47	0.17	0.04114	0.00351	0.0004	137
calcium(UKB)	rs6894167	T	C	5	76810617	JMY	0.52	0.01721	0.00262	0.0001	43
calcium(UKB)	rs6909201	G	A	6	73754171	CD109	0.48	0.04281	0.002617	0.0009	268
calcium(UKB)	rs697852	A	G	1	226727033	ITPKB	0.82	0.02161	0.003434	0.0001	40
calcium(UKB)	rs7012637	G	A	8	9315699	RP1-15J16.1	0.52	0.02282	0.00264	0.0002	75
calcium(UKB)	rs7208714	A	G	17	39387539	FBXL20	0.75	0.02718	0.003011	0.0003	82
calcium(UKB)	rs7221118	C	T	17	49830279	KAT7	0.21	0.02065	0.003205	0.0001	42
calcium(UKB)	rs722298	G	A	22	30381540	RNF215	0.56	0.01564	0.002646	0.0001	35
calcium(UKB)	rs72740967	T	C	1	219911536	SLC30A10	0.31	0.02024	0.002846	0.0002	51
calcium(UKB)	rs72847071	A	G	17	69420166	MAP2K6	0.09	0.03044	0.004671	0.0001	42
calcium(UKB)	rs72999033	C	T	19	19255823	HAPLN4	0.93	0.04334	0.005345	0.0002	66
calcium(UKB)	rs7312673	G	A	12	123088247	PITPNM2	0.07	0.0428	0.005052	0.0002	72
calcium(UKB)	rs7313874	C	T	12	89571272	RP1-81P6.1	0.6	0.01656	0.002677	0.0001	38
calcium(UKB)	rs73183155	T	C	3	121358229	STXBP5L	0.23	0.02769	0.003147	0.0002	77
calcium(UKB)	rs7320843	T	C	13	41955622	VWA8	0.14	0.03631	0.003737	0.0003	94
calcium(UKB)	rs74753001	T	C	3	186558135	TBCCD1	0.93	0.02824	0.005102	0.0001	31
calcium(UKB)	rs7559013	A	C	2	212870831	AC079610.1	0.87	0.02622	0.003913	0.0001	45
calcium(UKB)	rs7568296	C	T	2	69323124	GFPT1	0.42	0.01996	0.002657	0.0002	56
calcium(UKB)	rs760077	T	A	1	155208991	MTX1	0.61	0.02678	0.002683	0.0003	100
calcium(UKB)	rs76758508	T	C	12	57228336	SHMT2	0.32	0.01538	0.002804	0.0001	30
calcium(UKB)	rs77722590	G	A	10	63306019	JMJD1C	0.85	0.02343	0.003698	0.0001	40
calcium(UKB)	rs7864156	T	G	9	94142937	RP1-B6.3	0.61	0.01816	0.002687	0.0001	46
calcium(UKB)	rs7913072	A	G	10	51111800	PRKG1	0.86	0.02064	0.003757	0.0001	30
calcium(UKB)	rs7968405	T	C	12	4476262	C12orf4	0.82	0.02186	0.003446	0.0001	40
calcium(UKB)	rs8011945	T	G	14	21403840	CHD8	0.09	0.02593	0.004541	0.0001	33
calcium(UKB)	rs80339483	C	T	15	43108876	UBR1	0.93	0.03115	0.005179	0.0001	36
calcium(UKB)	rs8034835	G	A	15	51220467	CYP19A1	0.47	0.01872	0.002624	0.0002	51
calcium(UKB)	rs80350997	G	A	1	151019534	PRUNE1	0.92	0.04624	0.004954	0.0003	87
calcium(UKB)	rs8081353	T	C	17	75501334	CASKIN2	0.1	0.02541	0.004459	0.0001	32
calcium(UKB)	rs838718	A	G	2	233388004	DGKD	0.48	0.04735	0.002624	0.001	326
calcium(UKB)	rs841572	G	A	1	42970380	SLC2A-S1	0.59	0.03326	0.00267	0.0005	155
calcium(UKB)	rs848492	G	A	7	77928401	PHTF2	0.28	0.02657	0.002924	0.0003	83
calcium(UKB)	rs872629	C	A	19	51627385	SIGLEC5	0.89	0.02404	0.004133	0.0001	34
calcium(UKB)	rs900399	A	G	3	157080943	LINC02029	0.6	0.01859	0.002677	0.0002	48
calcium(UKB)	rs915894	G	T	6	32222613	NOTCH4	0.6	0.01512	0.00268	0.0001	32
calcium(UKB)	rs926103	T	C	1	156815190	SH2D2A	0.35	0.02229	0.002767	0.0002	65
calcium(UKB)	rs9282641	A	G	3	122077921	CD86	0.92	0.03573	0.004694	0.0002	58
calcium(UKB)	rs9388399	C	T	6	125012651	RNF217	0.31	0.02404	0.002829	0.0002	72
calcium(UKB)	rs9420589	G	T	10	92690476	HHEX	0.56	0.01726	0.002644	0.0001	43
calcium(UKB)	rs9530	G	A	7	65960907	GUSB	0.55	0.03213	0.002636	0.0005	149
calcium(UKB)	rs9562385	C	A	13	42206492	DGKH	0.56	0.01509	0.002639	0.0001	33
calcium(UKB)	rs9635741	A	C	17	57222987	MSI2	0.93	0.03926	0.005055	0.0002	60
calcium(UKB)	rs965344	G	A	14	94351741	SERPINA2	0.79	0.03077	0.003215	0.0003	92
calcium(UKB)	rs9806062	T	G	14	90383064	RP1-71B22.3	0.89	0.02609	0.004198	0.0001	39
calcium(UKB)	rs9895661	T	C	17	61379228	BCAS3	0.83	0.02837	0.003497	0.0002	66
copper	rs1175550	A	G	1	3774964	SMIM1	0.22	0.198	0.032	0.014	38
copper	rs2769264	T	G	1	151372265	SELENBP1	0.16	0.313	0.034	0.032	85
iron	rs1800562	G	A	6	26092913	HFE	0.07	0.328	0.016	0.009	420
iron	rs1799945	C	G	6	26090951	HFE	0.15	0.189	0.01	0.007	357
iron	rs855791	A	G	22	37066896	TMPRSS6	0.55	0.181	0.007	0.013	669
magnesium	rs11144134	T	C	9	74884880	TRPM6	0.08	0.011	0.001	0.005	121
magnesium	rs13146355	G	A	4	76490987	SHROOM3	0.44	0.005	0.001	0.001	25
magnesium	rs3925584	C	T	11	30738788	LOC101928338	0.55	0.006	0.001	0.002	36
magnesium	rs4072037	C	T	1	155192276	MUC1	0.54	0.01	0.001	0.004	100
magnesium	rs448378	G	A	3	169383111	MECOM	0.53	0.004	0.001	0.001	16
magnesium	rs7965584	G	A	12	89912002	LOC107984543-BRWD1P2	0.71	0.007	0.001	0.002	49
phosphorus	rs1697421	G	A	1	21496799	NBPF3-ALPL	0.49	0.05	0.005	0.005	100
phosphorus	rs17265703	G	A	3	122329797	CSTA	0.85	0.036	0.006	0.002	36
phosphorus	rs9469578	T	C	6	33738702	IP6K3	0.92	0.059	0.009	0.002	43
phosphorus	rs947583	T	C	6	135812521	PDE7B	0.29	0.035	0.005	0.002	49
phosphorus	rs2970818	T	A	12	4497002	C12orf4	0.09	0.047	0.008	0.002	35
selenium	rs921943	C	T	5	79020653	DMGDH	0.29	0.25	0.02	0.011	119
selenium	rs567754	T	C	5	79120593	BHMT	0.67	0.17	0.02	0.006	67
selenium	rs3797535	C	T	5	79004574	DMGDH	0.1	0.21	0.04	0.003	36
selenium	rs11951068	G	A	5	79008491	DMGDH	0.06	0.21	0.04	0.003	31
selenium	rs705415	T	C	5	78996137	ARSB-DMGDH	0.88	0.23	0.04	0.004	39
selenium	rs6586282	T	C	21	43058387	CBS	0.85	0.12	0.03	0.002	21
selenium	rs1789953	C	T	21	43062826	CBS	0.16	0.12	0.03	0.002	17
VitaminB6	rs1256335	G	A	1	21563893	ALPL	0.79	0.14	0.02	0.01	49
VitaminB6	rs4654748	C	T	1	21459575	NBPF3	0.52	0.1	0.01	0.021	100
zinc	rs2120019	C	T	15	75041843	PPCDC	0.79	0.287	0.033	0.028	76
zinc	rs4826508	C	T	X	56785262	NBDY	0.48	0.21	0.03	0.018	49
zinc	rs1532423	G	A	8	85356084	CA1	0.37	0.178	0.026	0.018	47
VitaminC	rs6693447	T	G	1	2330190	RER1	0.551	0.039	0.006	/	/
VitaminC	rs13028225	T	C	2	220031255	SLC23A3	0.857	0.102	0.009	/	/
VitaminC	rs33972313	C	T	5	138715502	SLC23A1	0.968	0.36	0.018	/	/
VitaminC	rs10051765	C	T	5	176799992	RGS14	0.342	0.039	0.007	/	/
VitaminC	rs7740812	G	A	6	52725787	GSTA5	0.594	0.038	0.006	/	/
VitaminC	rs117885456	A	G	12	96249111	SNRPF	0.087	0.078	0.012	/	/
VitaminC	rs2559850	A	G	12	102093459	CHPT1	0.598	0.058	0.006	/	/
VitaminC	rs10136000	A	G	14	105253581	AKT1	0.283	0.04	0.007	/	/
VitaminC	rs56738967	C	G	16	79740541	MAF	0.321	0.041	0.007	/	/
VitaminC	rs9895661	T	C	17	59456589	BCAS3	0.817	0.063	0.008	/	/

## Sheet: Supplementary Table S3
Supplementary Table S3. Forward MR analysis results for the association between our exposures and outcomes.
Outcome	Exposure	method	nsnp	pval	or	or_lci95	or_uci95
Forward MR analysis
Dental caries	Vitamin A	MR Egger	9	0.908271229762957	1.00053112200117	0.991852069986425	1.00928611875219
Dental caries	Vitamin A	Weighted median	9	0.0536854620418568	0.997648301701143	0.995264926338408	1.00003738456745
Dental caries	Vitamin A	Inverse variance weighted	9	0.910010831164834	0.999848842826564	0.997231209336524	1.00247334734613
Dental caries	Vitamin A	Simple mode	9	0.192178697279161	0.996871568028483	0.992582452084964	1.00117921796435
Dental caries	Vitamin A	Weighted mode	9	0.12396844879994	0.996871568028483	0.993316091804704	1.00043977072602
Chronic periodontitis	Vitamin A	MR Egger	8	0.397866643938871	1.86468872877565	0.487316280254223	7.13512803924594
Chronic periodontitis	Vitamin A	Weighted median	8	0.0686434233168386	0.684886348691912	0.455686469194712	1.02936852931683
Chronic periodontitis	Vitamin A	Inverse variance weighted	8	0.16302781915761	0.775203582935716	0.5420489701203	1.1086463181786
Chronic periodontitis	Vitamin A	Simple mode	8	0.297240358974635	0.63796259269187	0.29176954538254	1.39492375443269
Chronic periodontitis	Vitamin A	Weighted mode	8	0.176221217524595	0.608178220145345	0.31815130095507	1.16259385502684
Acute periodontitis	Vitamin A	MR Egger	8	0.104736146371415	0.0420591554775165	0.0016276190113857	1.08684682785553
Acute periodontitis	Vitamin A	Weighted median	8	0.852060685170345	0.901316181833862	0.302439190507855	2.68606346377082
Acute periodontitis	Vitamin A	Inverse variance weighted	8	0.956171996759855	1.02601696713623	0.410527978930219	2.56428519097446
Acute periodontitis	Vitamin A	Simple mode	8	0.584072684727922	0.568976120033507	0.0828915061291141	3.90551264280476
Acute periodontitis	Vitamin A	Weighted mode	8	0.390584098194396	2.14450434857618	0.418464440338788	10.9899395450158
Diseases of pulp and periapical tissues	Vitamin A	MR Egger	8	0.706858260086179	0.812625168219281	0.289859564397733	2.27820553513734
Diseases of pulp and periapical tissues	Vitamin A	Weighted median	8	0.177667231624229	1.23217879473267	0.909559045739986	1.6692314691386
Diseases of pulp and periapical tissues	Vitamin A	Inverse variance weighted	8	0.237271949554782	1.16279033228696	0.90546403808874	1.49324688776597
Diseases of pulp and periapical tissues	Vitamin A	Simple mode	8	0.339234120282492	1.27978264205432	0.798692529137519	2.05065597980763
Diseases of pulp and periapical tissues	Vitamin A	Weighted mode	8	0.406708670383892	1.20966742633606	0.792685924806562	1.84599629758228
Impacted teeth	Vitamin A	MR Egger	6	0.624047350705308	0.99354110433103	0.97002395459037	1.01762840115858
Impacted teeth	Vitamin A	Weighted median	6	0.348974215872525	0.999222342129061	0.997596879622591	1.00085045312854
Impacted teeth	Vitamin A	Inverse variance weighted	6	0.57240825697728	0.999604818698948	0.998233942209543	1.00097757781553
Impacted teeth	Vitamin A	Simple mode	6	0.380280681239526	0.998763983228722	0.996250139923489	1.00128416972821
Impacted teeth	Vitamin A	Weighted mode	6	0.365493899673273	0.99880371671984	0.996451006931913	1.00116198146562
Cleft lip and cleft palate	Vitamin A	MR Egger	8	0.391471208424126	16.4782367791696	0.043014398614594	6312.5905765483
Cleft lip and cleft palate	Vitamin A	Weighted median	8	0.548621767817478	1.62203441889918	0.333937771971019	7.87870039547948
Cleft lip and cleft palate	Vitamin A	Inverse variance weighted	8	0.121925877833405	3.00688378199745	0.745171605619465	12.1332455641854
Cleft lip and cleft palate	Vitamin A	Simple mode	8	0.580070545100658	2.03012385161653	0.185515164482934	22.2159889968536
Cleft lip and cleft palate	Vitamin A	Weighted mode	8	0.735021074727237	1.51553961878758	0.149911628060739	15.3214288032692
Oral cavity cancer	Vitamin A	MR Egger	7	0.899678754169936	0.999433307147532	0.991094383814966	1.00784239296258
Oral cavity cancer	Vitamin A	Weighted median	7	0.743103193426712	1.00015932250974	0.999206915419915	1.0011126373988
Oral cavity cancer	Vitamin A	Inverse variance weighted	7	0.64082584131411	1.00017158364005	0.999450941467048	1.00089274542348
Oral cavity cancer	Vitamin A	Simple mode	7	0.781852593612626	1.00019154474616	0.998895996321177	1.00148877347192
Oral cavity cancer	Vitamin A	Weighted mode	7	0.789485531253211	1.00018374720371	0.998894418509803	1.00147474010602
Oropharyngeal cancer	Vitamin A	MR Egger	7	0.294071396298788	0.994128886748311	0.984385537598321	1.00396867458927
Oropharyngeal cancer	Vitamin A	Weighted median	7	0.777273543473263	0.999835391050663	0.998695578841187	1.00097650412889
Oropharyngeal cancer	Vitamin A	Inverse variance weighted	7	0.821429477531565	0.99990124279492	0.999044061719745	1.00075915933255
Oropharyngeal cancer	Vitamin A	Simple mode	7	0.785137319716918	0.999756406698395	0.998083487066829	1.00143213036402
Oropharyngeal cancer	Vitamin A	Weighted mode	7	0.786056842710141	0.999770800535927	0.998189667996358	1.00135443758961
Mouth ulcers	Vitamin A	MR Egger	9	0.48415559041094	0.993001840968653	0.974668271936842	1.01168026554067
Mouth ulcers	Vitamin A	Weighted median	9	0.972918685950312	0.999874422790967	0.992650833901329	1.00715057823741
Mouth ulcers	Vitamin A	Inverse variance weighted	9	0.71840536100096	1.00109115637235	0.995174468778342	1.00704302090587
Mouth ulcers	Vitamin A	Simple mode	9	0.9331336953054	1.00055464921909	0.98807340764436	1.0131935525526
Mouth ulcers	Vitamin A	Weighted mode	9	0.940399863650842	1.00044636278585	0.989167824014074	1.01185349999536
Toothache	Vitamin A	MR Egger	8	0.429424797521494	1.00635053446818	0.991717767218572	1.02119920777944
Toothache	Vitamin A	Weighted median	8	0.369288216014404	0.997759399539779	0.992885380831637	1.00265734453269
Toothache	Vitamin A	Inverse variance weighted	8	0.290889104166306	0.997914125039513	0.994054771544151	1.00178846222574
Toothache	Vitamin A	Simple mode	8	0.734738413367384	0.998644329387754	0.991142812398675	1.00620262200637
Toothache	Vitamin A	Weighted mode	8	0.750335221419047	0.998644329387754	0.990654272324524	1.00669882973221
Loose teeth	Vitamin A	MR Egger	8	0.94391931384326	1.00075822201301	0.980691130939695	1.02123592977433
Loose teeth	Vitamin A	Weighted median	8	0.397851579306832	1.00209191893791	0.997248994126418	1.00695836236999
Loose teeth	Vitamin A	Inverse variance weighted	8	0.901502974531379	1.00031336108247	0.995362262923506	1.0052890868307
Loose teeth	Vitamin A	Simple mode	8	0.429935402314101	1.0030611883944	0.995912374803955	1.01026131727828
Loose teeth	Vitamin A	Weighted mode	8	0.462126569785902	1.00298496666098	0.995480664633231	1.01054583889741
Bleeding gums	Vitamin A	MR Egger	9	0.711861230168655	0.995049095135201	0.970204587072033	1.0205298087875
Bleeding gums	Vitamin A	Weighted median	9	0.804638833571237	1.00109085458404	0.992479401754974	1.00977702646491
Bleeding gums	Vitamin A	Inverse variance weighted	9	0.399076576000684	1.0033892929541	0.995529236959342	1.01131140687538
Bleeding gums	Vitamin A	Simple mode	9	0.820614267522718	0.99860050925988	0.98697125083323	1.01036679260133
Bleeding gums	Vitamin A	Weighted mode	9	0.795225019677233	0.998300569241108	0.985975058901219	1.01078015873723
Painful gums	Vitamin A	MR Egger	7	0.538758454216918	0.981706480638393	0.929287518598409	1.03708227522628
Painful gums	Vitamin A	Weighted median	7	0.741584510400525	1.00081461167203	0.995982460039262	1.00567020718091
Painful gums	Vitamin A	Inverse variance weighted	7	0.788639360732255	0.999387312673433	0.99491915780558	1.00387553390323
Painful gums	Vitamin A	Simple mode	7	0.546441109631895	1.00198726276755	0.99590401986713	1.00810766371076
Painful gums	Vitamin A	Weighted mode	7	0.588895777282396	1.00198726276755	0.995179202864771	1.00884189687476
Dental caries	Vitamin B9	MR Egger	6	0.98680029718686	1.00004769278266	0.99475062613531	1.00537296641408
Dental caries	Vitamin B9	Weighted median	6	0.98274397269565	0.999978007304884	0.997987047778873	1.00197
Dental caries	Vitamin B9	Inverse variance weighted	6	0.749115213167454	1.00026708882252	0.998631299087534	1.00190555803296
Dental caries	Vitamin B9	Simple mode	6	0.811526002092857	0.999636591243229	0.996807616696438	1.00247359451778
Dental caries	Vitamin B9	Weighted mode	6	0.830708149645642	0.999672639521628	0.996828539416886	1.00252485426704
Chronic periodontitis	Vitamin B9	MR Egger	6	0.551359508641414	0.613771805096283	0.140730361946449	2.67686250160074
Chronic periodontitis	Vitamin B9	Weighted median	6	0.0456114554967803	0.699013394994218	0.492042775289544	0.993043188356568
Chronic periodontitis	Vitamin B9	Inverse variance weighted	6	0.185344651199579	0.80287699305349	0.580157389023156	1.1110975714021
Chronic periodontitis	Vitamin B9	Simple mode	6	0.134760593662642	0.646574003840419	0.400292820589389	1.04438031595641
Chronic periodontitis	Vitamin B9	Weighted mode	6	0.12542093066623	0.629813527653913	0.384708449571803	1.03107971778985
Acute periodontitis	Vitamin B9	MR Egger	6	0.121338839891533	36.3956996914358	1.00284395260651	1320.89040631522
Acute periodontitis	Vitamin B9	Weighted median	6	0.405950096589251	1.55010901164905	0.551309640522596	4.35841815811145
Acute periodontitis	Vitamin B9	Inverse variance weighted	6	0.275512534846186	1.75618441588682	0.63822875742523	4.83241105437819
Acute periodontitis	Vitamin B9	Simple mode	6	0.359847919587213	2.07651383468989	0.501314739317255	8.60120273250082
Acute periodontitis	Vitamin B9	Weighted mode	6	0.690080279756993	1.33757954115804	0.347205484386918	5.15291119921017
Diseases of pulp and periapical tissues	Vitamin B9	MR Egger	6	0.960674015282246	1.02161588638253	0.459532185494615	2.2712207158804
Diseases of pulp and periapical tissues	Vitamin B9	Weighted median	6	0.390149893147028	1.10557302338608	0.879372703067851	1.38995866687111
Diseases of pulp and periapical tissues	Vitamin B9	Inverse variance weighted	6	0.350780423875347	1.09636608142337	0.903703079717883	1.33010345042852
Diseases of pulp and periapical tissues	Vitamin B9	Simple mode	6	0.501270607465905	1.1132280189921	0.832811548778042	1.48806368510069
Diseases of pulp and periapical tissues	Vitamin B9	Weighted mode	6	0.511042674923139	1.11160110457881	0.829082975861768	1.49039004740926
Impacted teeth	Vitamin B9	Wald ratio	1	0.68904383591064	0.999460738752168	0.996823566574167	1.00210488776873
Cleft lip and cleft palate	Vitamin B9	MR Egger	6	0.632092184702401	3.09710186038789	0.0428141498205425	224.039014527291
Cleft lip and cleft palate	Vitamin B9	Weighted median	6	0.256753020757512	0.443494705185029	0.108799134668216	1.80780439225878
Cleft lip and cleft palate	Vitamin B9	Inverse variance weighted	6	0.0103118764153529	0.258418822055253	0.0918957608988185	0.726696062356485
Cleft lip and cleft palate	Vitamin B9	Simple mode	6	0.505790075061975	0.513622290783005	0.0829884240824928	3.17885127360593
Cleft lip and cleft palate	Vitamin B9	Weighted mode	6	0.467843204695805	0.494924400018583	0.0855346163409253	2.86375472542518
Oral cavity cancer	Vitamin B9	MR Egger	6	0.804324731278276	0.999721808537316	0.997664271249887	1.0017835891958
Oral cavity cancer	Vitamin B9	Weighted median	6	0.501558541199977	1.00026539574141	0.999491567120214	1.00103982347795
Oral cavity cancer	Vitamin B9	Inverse variance weighted	6	0.672214107644885	1.00013684602345	0.99950308463728	1.00077100926279
Oral cavity cancer	Vitamin B9	Simple mode	6	0.558544652045175	1.00038752131238	0.999175441708485	1.00160107126564
Oral cavity cancer	Vitamin B9	Weighted mode	6	0.572217792112393	1.0003727738983	0.999163553279287	1.00158345795591
Oropharyngeal cancer	Vitamin B9	MR Egger	6	0.0573406263643295	0.996737942865618	0.994326637900083	0.999155095398154
Oropharyngeal cancer	Vitamin B9	Weighted median	6	0.0837769754165351	0.999130181077314	0.998145168661362	1.00011616554572
Oropharyngeal cancer	Vitamin B9	Inverse variance weighted	6	0.279909860681598	0.999459552681728	0.998479959911572	1.00044010651473
Oropharyngeal cancer	Vitamin B9	Simple mode	6	0.23391687238305	0.998821480529998	0.997117111642194	1.00052876268974
Oropharyngeal cancer	Vitamin B9	Weighted mode	6	0.19630927154289	0.998806808832569	0.997239827791008	1.00037625209988
Mouth ulcers	Vitamin B9	MR Egger	6	0.905779854591798	1.00116284536226	0.983232210146348	1.01942047116689
Mouth ulcers	Vitamin B9	Weighted median	6	0.777815338882592	0.998976581619126	0.991896522259789	1.00610717774254
Mouth ulcers	Vitamin B9	Inverse variance weighted	6	0.598163525228935	0.998505420161247	0.992966861022214	1.00407487221176
Mouth ulcers	Vitamin B9	Simple mode	6	0.986338254557076	1.00009668697828	0.989620819081266	1.01068344968075
Mouth ulcers	Vitamin B9	Weighted mode	6	0.929217070626373	1.00047951510324	0.990464347347877	1.0105959521122
Toothache	Vitamin B9	MR Egger	6	0.741317261068269	0.997859999057925	0.986088949318686	1.00977156108265
Toothache	Vitamin B9	Weighted median	6	0.526384543313998	1.00138319695796	0.997110111663199	1.0056745944308
Toothache	Vitamin B9	Inverse variance weighted	6	0.509517284950356	1.00122979485569	0.997579826968036	1.00489311732934
Toothache	Vitamin B9	Simple mode	6	0.333661028501273	1.00375301120434	0.996886974302544	1.01066633778286
Toothache	Vitamin B9	Weighted mode	6	0.299530337545438	1.00375301120434	0.997403673372324	1.01014276806828
Loose teeth	Vitamin B9	MR Egger	6	0.675260215830026	1.00273473387108	0.990907803865362	1.01470282360206
Loose teeth	Vitamin B9	Weighted median	6	0.422018986231697	1.00177195682458	0.997451980670688	1.00611064284555
Loose teeth	Vitamin B9	Inverse variance weighted	6	0.492675731289331	1.00127901638387	0.99762933160571	1.00494205301382
Loose teeth	Vitamin B9	Simple mode	6	0.592076886564064	1.00177430393624	0.995707581110828	1.00787799055157
Loose teeth	Vitamin B9	Weighted mode	6	0.573914480496151	1.00177430393624	0.996001484779919	1.00758058232081
Bleeding gums	Vitamin B9	MR Egger	6	0.953801780518763	1.0008693182744	0.973596465764783	1.02890615104706
Bleeding gums	Vitamin B9	Weighted median	6	0.990204251850564	0.999953042457774	0.992484842670087	1.00747743857781
Bleeding gums	Vitamin B9	Inverse variance weighted	6	0.46559442632856	0.99714556654021	0.989518372570877	1.00483155081547
Bleeding gums	Vitamin B9	Simple mode	6	0.797465816585531	1.0015500741894	0.990379426799429	1.01284671709154
Bleeding gums	Vitamin B9	Weighted mode	6	0.780846398025481	1.00164533921355	0.990713235572525	1.01269807401779
Painful gums	Vitamin B9	MR Egger	6	0.845845899018228	1.00159935473836	0.986584759613647	1.01684245335917
Painful gums	Vitamin B9	Weighted median	6	0.168055703662283	0.997018165121128	0.992793722211081	1.00126058348519
Painful gums	Vitamin B9	Inverse variance weighted	6	0.81532281972493	0.999499602666978	0.995310286512387	1.00370655188543
Painful gums	Vitamin B9	Simple mode	6	0.269831184437071	0.99576072653254	0.989099119895625	1.00246719925223
Painful gums	Vitamin B9	Weighted mode	6	0.266043153134147	0.995840582889472	0.989362245910329	1.00236133997327
Dental caries	Vitamin B12	MR Egger	7	0.449119451875932	1.00571216826051	0.99212538653425	1.01948501582097
Dental caries	Vitamin B12	Weighted median	7	0.823862854764856	0.999200671069642	0.992189431934453	1.0062614546493
Dental caries	Vitamin B12	Inverse variance weighted	7	0.876320898548141	1.00042203715036	0.995120054417743	1.00575226875685
Dental caries	Vitamin B12	Simple mode	7	0.818547108898318	0.998731299534427	0.988417167822544	1.00915305919576
Dental caries	Vitamin B12	Weighted mode	7	0.797320688577291	0.998682900062862	0.989120088827094	1.00833816454042
Chronic periodontitis	Vitamin B12	MR Egger	8	0.539261950874055	0.3838809078889	0.0214782633761446	6.86110179677194
Chronic periodontitis	Vitamin B12	Weighted median	8	0.741753186173884	1.20265689667748	0.401303690827976	3.60421208223057
Chronic periodontitis	Vitamin B12	Inverse variance weighted	8	0.414886581127927	0.657537715008408	0.239999819883087	1.80148404640094
Chronic periodontitis	Vitamin B12	Simple mode	8	0.82154065040975	1.23221227349711	0.214639140806815	7.07395250115861
Chronic periodontitis	Vitamin B12	Weighted mode	8	0.662997482415378	1.39774114209318	0.33017706324428	5.91706849986286
Acute periodontitis	Vitamin B12	MR Egger	8	0.897581322433795	0.696539967857457	0.00355077802031118	136.637076169675
Acute periodontitis	Vitamin B12	Weighted median	8	0.908832667927037	0.866889997277334	0.075186568493659	9.99511325540644
Acute periodontitis	Vitamin B12	Inverse variance weighted	8	0.9320452180003	1.08942178044212	0.152136649903615	7.80114335667033
Acute periodontitis	Vitamin B12	Simple mode	8	0.878683216124448	0.782964978039443	0.0378604558628564	16.1919380753609
Acute periodontitis	Vitamin B12	Weighted mode	8	0.875754122922357	0.756242944364673	0.0258314791999153	22.139784813532
Diseases of pulp and periapical tissues	Vitamin B12	MR Egger	8	0.972002447330481	1.03151581531373	0.195671485990585	5.43781262689212
Diseases of pulp and periapical tissues	Vitamin B12	Weighted median	8	0.648649578504013	0.83883862675048	0.393885170811447	1.78643496600553
Diseases of pulp and periapical tissues	Vitamin B12	Inverse variance weighted	8	0.634437614834948	0.880593600909917	0.521358942744045	1.48735358001558
Diseases of pulp and periapical tissues	Vitamin B12	Simple mode	8	0.364092782987837	0.562321039631703	0.175832077342968	1.79833484532921
Diseases of pulp and periapical tissues	Vitamin B12	Weighted mode	8	0.306192229831501	0.551658259295808	0.191839625653778	1.58636065939012
Impacted teeth	Vitamin B12	Inverse variance weighted	2	0.649265577703732	0.998533025441838	0.992235314210018	1.00487070820681
Cleft lip and cleft palate	Vitamin B12	MR Egger	8	0.784182793080587	0.337654813480143	0.000200385651570792	568.956769971289
Cleft lip and cleft palate	Vitamin B12	Weighted median	8	0.486066853386581	3.61396508724569	0.0972644080110702	134.28081164432
Cleft lip and cleft palate	Vitamin B12	Inverse variance weighted	8	0.562202394455551	2.27936475778091	0.140526961531897	36.9715792782891
Cleft lip and cleft palate	Vitamin B12	Simple mode	8	0.492015966579469	6.36792655431224	0.0426767626110348	950.17724213762
Cleft lip and cleft palate	Vitamin B12	Weighted mode	8	0.596381482208331	4.09176370470013	0.0281637464500008	594.470989320416
Oral cavity cancer	Vitamin B12	MR Egger	5	0.471617884416718	0.992794242680747	0.975808976459478	1.01007516028007
Oral cavity cancer	Vitamin B12	Weighted median	5	0.819852606178602	1.00039716812125	0.996984093042365	1.00382192752045
Oral cavity cancer	Vitamin B12	Inverse variance weighted	5	0.5997631219924	0.999357773370339	0.996962590064135	1.00175871105803
Oral cavity cancer	Vitamin B12	Simple mode	5	0.62528133425077	1.00137469630544	0.996283459101788	1.00649195090005
Oral cavity cancer	Vitamin B12	Weighted mode	5	0.599483141384461	1.00145670321566	0.99645206702041	1.00648647497365
Oropharyngeal cancer	Vitamin B12	MR Egger	6	0.278241877619198	1.00542487695004	0.996956334171447	1.01396535489203
Oropharyngeal cancer	Vitamin B12	Weighted median	6	0.703241983620427	1.00059670934134	0.997530395012065	1.0036724492316
Oropharyngeal cancer	Vitamin B12	Inverse variance weighted	6	0.351265244504362	1.00122750416277	0.99864818423876	1.00381348598372
Oropharyngeal cancer	Vitamin B12	Simple mode	6	0.88313382218549	1.00034225417827	0.996013708947298	1.00468961070035
Oropharyngeal cancer	Vitamin B12	Weighted mode	6	0.883421532856044	1.00032791742598	0.996170032203163	1.00450315712541
Mouth ulcers	Vitamin B12	MR Egger	8	0.418355343956997	1.02660494677632	0.967558329379687	1.08925496762691
Mouth ulcers	Vitamin B12	Weighted median	8	0.276729800630066	1.01256936393992	0.990032507680918	1.03561924364623
Mouth ulcers	Vitamin B12	Inverse variance weighted	8	0.445110133110006	1.00656891144655	0.989793833604376	1.02362829418845
Mouth ulcers	Vitamin B12	Simple mode	8	0.477668064643615	1.01269126272865	0.979861619297041	1.04662084258662
Mouth ulcers	Vitamin B12	Weighted mode	8	0.466380205998721	1.01241231587778	0.981123560617959	1.04469889266081
Toothache	Vitamin B12	MR Egger	8	0.820629603464413	1.00388662198431	0.972177111304037	1.03663040209541
Toothache	Vitamin B12	Weighted median	8	0.562479352133243	0.995965187688678	0.982430978296533	1.00968584765895
Toothache	Vitamin B12	Inverse variance weighted	8	0.131831032877169	0.991551866559064	0.98067036276096	1.0025541113619
Toothache	Vitamin B12	Simple mode	8	0.844608958766638	0.997685133398386	0.975651413833152	1.02021645363431
Toothache	Vitamin B12	Weighted mode	8	0.835931467546838	0.997685133398386	0.976823298886778	1.01899251025085
Loose teeth	Vitamin B12	MR Egger	8	0.409595439545705	1.01461702200119	0.98257232292212	1.04770679706614
Loose teeth	Vitamin B12	Weighted median	8	0.877385005023612	1.0010938135469	0.987286769074298	1.01509
Loose teeth	Vitamin B12	Inverse variance weighted	8	0.732778052142729	0.99807979794834	0.987127958387823	1.0091531443396
Loose teeth	Vitamin B12	Simple mode	8	0.897187818715083	1.00150513606595	0.979710771792415	1.0237843315037
Loose teeth	Vitamin B12	Weighted mode	8	0.888337278175544	1.00150513606595	0.98143302560701	1.02198775810109
Bleeding gums	Vitamin B12	MR Egger	9	0.34523190346714	1.03007511605083	0.972624049641107	1.09091970849235
Bleeding gums	Vitamin B12	Weighted median	9	0.0782440728672449	1.02047695353782	0.997711589172098	1.04376176843447
Bleeding gums	Vitamin B12	Inverse variance weighted	9	0.258561506549909	1.01026403208031	0.992524270766223	1.02832086285129
Bleeding gums	Vitamin B12	Simple mode	9	0.187773914997996	1.02276156032192	0.991909812870873	1.05457290138565
Bleeding gums	Vitamin B12	Weighted mode	9	0.19187792913154	1.02245038954306	0.991706901009688	1.05414694403395
Painful gums	Vitamin B12	MR Egger	7	0.754046570064936	1.00578569714958	0.972010008826136	1.04073503297805
Painful gums	Vitamin B12	Weighted median	7	0.926711808083424	1.00062630747834	0.98736520057039	1.01406552169282
Painful gums	Vitamin B12	Inverse variance weighted	7	0.995165923026124	0.999969353951647	0.990104363645815	1.00993263494007
Painful gums	Vitamin B12	Simple mode	7	0.721472415330718	1.00359167882497	0.984896677346614	1.02264154298924
Painful gums	Vitamin B12	Weighted mode	7	0.762578870745469	1.00306518356293	0.984214180319816	1.02227724675659
Dental caries	Vitamin C	MR Egger	9	0.269547714496431	0.997593738959517	0.99367259655422	1.00153035462816
Dental caries	Vitamin C	Weighted median	9	0.0817839030451213	0.997757921193783	0.995238999795983	1.00028321790948
Dental caries	Vitamin C	Inverse variance weighted	9	0.000761647356835587	0.99668247893275	0.994755991476646	0.998612697307744
Dental caries	Vitamin C	Simple mode	9	0.561348662045922	0.998449924305817	0.993452420606159	1.00347256765254
Dental caries	Vitamin C	Weighted mode	9	0.136622992456938	0.997783308234335	0.995163662668085	1.00040984969435
Chronic periodontitis	Vitamin C	MR Egger	7	0.90442135764462	1.17123665189636	0.10076653095509	13.6136004856294
Chronic periodontitis	Vitamin C	Weighted median	7	0.10635718147047	0.591591392651553	0.312828061569194	1.11876272896954
Chronic periodontitis	Vitamin C	Inverse variance weighted	7	0.0983497173468543	0.684690674105607	0.436943652133744	1.07291024121274
Chronic periodontitis	Vitamin C	Simple mode	7	0.23706256210127	0.474724552681225	0.156156896123376	1.44318570945683
Chronic periodontitis	Vitamin C	Weighted mode	7	0.160978338940635	0.492818193489721	0.206989506009591	1.17334340526045
Acute periodontitis	Vitamin C	MR Egger	8	0.825977504119055	1.19970551271606	0.253660566823983	5.67409170160864
Acute periodontitis	Vitamin C	Weighted median	8	0.813585293977642	1.15410458635117	0.350640916929679	3.79863653078438
Acute periodontitis	Vitamin C	Inverse variance weighted	8	0.827591155919799	1.11095539519101	0.430976838662083	2.86377777036817
Acute periodontitis	Vitamin C	Simple mode	8	0.977840517968671	0.975933802727297	0.185784770560068	5.12661390077622
Acute periodontitis	Vitamin C	Weighted mode	8	0.855221697901559	1.13324781598499	0.310369728061968	4.13780886574843
Diseases of pulp and periapical tissues	Vitamin C	MR Egger	6	0.185838616367531	1.4000374547458	0.925998121582451	2.11674821903682
Diseases of pulp and periapical tissues	Vitamin C	Weighted median	6	0.165037405381507	1.25786447801868	0.90985813775599	1.73897773664309
Diseases of pulp and periapical tissues	Vitamin C	Inverse variance weighted	6	0.380282052058223	1.13323243347615	0.85698663525335	1.49852482577238
Diseases of pulp and periapical tissues	Vitamin C	Simple mode	6	0.846364907049751	1.06066853118741	0.602373681262387	1.8676409146787
Diseases of pulp and periapical tissues	Vitamin C	Weighted mode	6	0.237998670085445	1.28373821644615	0.890792673614231	1.8500194907059
Impacted teeth	Vitamin C	MR Egger	5	0.947022198585403	1.00053160496281	0.986190490364135	1.01508126706822
Impacted teeth	Vitamin C	Weighted median	5	0.914176121389369	1.00017524051972	0.996993031465543	1.00336760657012
Impacted teeth	Vitamin C	Inverse variance weighted	5	0.996000731820471	1.00000655510313	0.997446565192118	1.00257311533938
Impacted teeth	Vitamin C	Simple mode	5	0.666309668668761	0.998992417034021	0.994753884862317	1.00324900910501
Impacted teeth	Vitamin C	Weighted mode	5	0.842241461303668	0.99957768612754	0.99568748623124	1.00348308522584
Cleft lip and cleft palate	Vitamin C	MR Egger	8	0.288180380189044	3.74202410994476	0.406476260548635	34.4491076071894
Cleft lip and cleft palate	Vitamin C	Weighted median	8	0.836907264903992	1.19222526531419	0.223520085139022	6.35916491517724
Cleft lip and cleft palate	Vitamin C	Inverse variance weighted	8	0.991275384592351	0.992508510235121	0.257852214441813	3.82030127226785
Cleft lip and cleft palate	Vitamin C	Simple mode	8	0.783760723831888	0.677803787951778	0.046805843765639	9.81539777943381
Cleft lip and cleft palate	Vitamin C	Weighted mode	8	0.440275496327058	2.2116170687457	0.330231284354196	14.8115889999118
Oral cavity cancer	Vitamin C	MR Egger	7	0.685922513472599	1.00108951329288	0.996119001388728	1.00608482744311
Oral cavity cancer	Vitamin C	Weighted median	7	0.862880096578593	1.00014135977493	0.998538302183603	1.00174699092165
Oral cavity cancer	Vitamin C	Inverse variance weighted	7	0.661098297128625	1.00027745779996	0.999037588030612	1.00151886632727
Oral cavity cancer	Vitamin C	Simple mode	7	0.885538109371324	1.00018321005661	0.997794895487325	1.00257724127819
Oral cavity cancer	Vitamin C	Weighted mode	7	0.930989825841381	0.999894278661728	0.997602238496171	1.0021915849022
Oropharyngeal cancer	Vitamin C	MR Egger	8	0.183357411612253	0.998909869879989	0.997490708389222	1.00033105045657
Oropharyngeal cancer	Vitamin C	Weighted median	8	0.292749538068758	0.999374985623213	0.998211672365608	1.00053965460303
Oropharyngeal cancer	Vitamin C	Inverse variance weighted	8	0.690570563353729	0.999806495211783	0.998854296589319	1.00075960155644
Oropharyngeal cancer	Vitamin C	Simple mode	8	0.875654427977809	1.00020129868664	0.997773059188709	1.00263544769174
Oropharyngeal cancer	Vitamin C	Weighted mode	8	0.333499892320815	0.999328485784087	0.998062545566892	1.00059603171692
Mouth ulcers	Vitamin C	MR Egger	9	0.798029352120295	0.997942313379004	0.982900847351556	1.01321396101721
Mouth ulcers	Vitamin C	Weighted median	9	0.444171741211821	0.996766984127066	0.988533114354944	1.00506943694455
Mouth ulcers	Vitamin C	Inverse variance weighted	9	0.550731171647891	0.997218869823635	0.98813738249944	1.00638382065552
Mouth ulcers	Vitamin C	Simple mode	9	0.720209955221745	1.00267051286414	0.988645503949637	1.01689448174382
Mouth ulcers	Vitamin C	Weighted mode	9	0.413858793875604	0.99638309897276	0.988206203154277	1.00462765437991
Toothache	Vitamin C	MR Egger	9	0.999668334403599	1.00000147880397	0.993295112212085	1.00675312433896
Toothache	Vitamin C	Weighted median	9	0.900603848218575	0.999658959461768	0.9943223096115	1.00502425176665
Toothache	Vitamin C	Inverse variance weighted	9	0.694659459162393	0.999133444893041	0.994817849268867	1.00346776189983
Toothache	Vitamin C	Simple mode	9	0.834093409981179	0.999029412272222	0.990281232394513	1.00785487388432
Toothache	Vitamin C	Weighted mode	9	0.936119193127988	0.999755504147634	0.993978631021577	1.00556595170082
Loose teeth	Vitamin C	MR Egger	9	0.674734752784474	0.99774787711346	0.987726880681497	1.00787054170031
Loose teeth	Vitamin C	Weighted median	9	0.763404286982154	1.00084573396026	0.995351680961546	1.00637011254031
Loose teeth	Vitamin C	Inverse variance weighted	9	0.616430187918838	1.00165932153557	0.995182324625249	1.00817847302193
Loose teeth	Vitamin C	Simple mode	9	0.534990025453534	0.997125948184232	0.988486165359793	1.00584124632681
Loose teeth	Vitamin C	Weighted mode	9	0.935501322300532	1.00023383630255	0.994759738835075	1.00573805736864
Bleeding gums	Vitamin C	MR Egger	9	0.167105835119965	0.990661364350457	0.978912947058388	1.00255078019534
Bleeding gums	Vitamin C	Weighted median	9	0.353462079836386	0.995592598880869	0.986346557331229	1.0049253130951
Bleeding gums	Vitamin C	Inverse variance weighted	9	0.675561691435748	0.998435868662882	0.991143396886499	1.00578
Bleeding gums	Vitamin C	Simple mode	9	0.420753121904756	1.00967	0.987481939720705	1.03234718440889
Bleeding gums	Vitamin C	Weighted mode	9	0.329952063072821	0.994631401025856	0.984565384427426	1.00480033073881
Painful gums	Vitamin C	MR Egger	9	0.516300118310266	0.997486109794747	0.990311747100242	1.00471244751653
Painful gums	Vitamin C	Weighted median	9	0.617773447037544	0.998913247643632	0.994656130780932	1.00318858491781
Painful gums	Vitamin C	Inverse variance weighted	9	0.439954699953927	0.998562975405827	0.994925109647241	1.00221414273571
Painful gums	Vitamin C	Simple mode	9	0.124624577264707	0.992290211678225	0.983553468381832	1.00110456202485
Painful gums	Vitamin C	Weighted mode	9	0.449924876828383	0.998131569226453	0.993536131088847	1.00274826280814
Dental caries	Vitamin D	MR Egger	10	0.679019717856187	0.9964610511897	0.980462850036101	1.01272029480926
Dental caries	Vitamin D	Weighted median	10	0.0906899833790441	1.0048874371335	0.999227280841589	1.01057965556969
Dental caries	Vitamin D	Inverse variance weighted	10	0.202669305044847	1.00291013830761	0.99843644344628	1.0074038784566
Dental caries	Vitamin D	Simple mode	10	0.204147744751949	1.00678160854171	0.99708751198091	1.01656995511267
Dental caries	Vitamin D	Weighted mode	10	0.242236818982387	1.00670327316202	0.996226502269905	1.01729022254073
Chronic periodontitis	Vitamin D	MR Egger	9	0.712218184047403	0.528415407531689	0.0204088233338529	13.6814767980143
Chronic periodontitis	Vitamin D	Weighted median	9	0.0706034905289095	0.443690132028501	0.183862578917065	1.07069602971394
Chronic periodontitis	Vitamin D	Inverse variance weighted	9	0.0150052723578194	0.459466842027648	0.245519438674313	0.859849550254559
Chronic periodontitis	Vitamin D	Simple mode	9	0.302192259202013	0.497253316573094	0.143645815372735	1.72132310434066
Chronic periodontitis	Vitamin D	Weighted mode	9	0.217127789607091	0.497253316573094	0.178933017019815	1.38186269343214
Acute periodontitis	Vitamin D	MR Egger	9	0.291116314201959	0.0152563599120769	1.16137350925934e-05	20.0415
Acute periodontitis	Vitamin D	Weighted median	9	0.718016287532286	0.636086502388482	0.0545836855781552	7.41258187744542
Acute periodontitis	Vitamin D	Inverse variance weighted	9	0.77460380005731	0.770225221898618	0.128992466646454	4.59908169734255
Acute periodontitis	Vitamin D	Simple mode	9	0.602637733536803	0.330682823674949	0.00604264043950254	18.096580620415
Acute periodontitis	Vitamin D	Weighted mode	9	0.543506404128296	0.29530269251201	0.00681933308121215	12.7877138667851
Diseases of pulp and periapical tissues	Vitamin D	MR Egger	9	0.516267931772726	0.445878246466731	0.0439860780188576	4.51978034020252
Diseases of pulp and periapical tissues	Vitamin D	Weighted median	9	0.789208382988393	1.09539960851886	0.561623508993726	2.13648517757591
Diseases of pulp and periapical tissues	Vitamin D	Inverse variance weighted	9	0.926028853965346	0.977783693039426	0.608495898657731	1.57118717230925
Diseases of pulp and periapical tissues	Vitamin D	Simple mode	9	0.58586424643993	1.41760173136064	0.42485134696021	4.73011250437411
Diseases of pulp and periapical tissues	Vitamin D	Weighted mode	9	0.426208742269106	1.66790808556632	0.504320590092234	5.51616855736294
Impacted teeth	Vitamin D	Wald ratio	1	0.249507943815853	1.00552151950431	0.996141683865144	1.01498967723465
Cleft lip and cleft palate	Vitamin D	MR Egger	9	0.656149658629644	0.0952821500072025	4.72209869123383e-06	1922.59601156766
Cleft lip and cleft palate	Vitamin D	Weighted median	9	0.197628470006103	0.107875395255573	0.00364475387761513	3.19283586554839
Cleft lip and cleft palate	Vitamin D	Inverse variance weighted	9	0.101642915077429	0.120315375857826	0.00953099800122902	1.51881153116843
Cleft lip and cleft palate	Vitamin D	Simple mode	9	0.225426605346946	0.0267814838889481	0.000120749446824637	5.93996824130911
Cleft lip and cleft palate	Vitamin D	Weighted mode	9	0.373533126649019	0.0861455926564914	0.000525924946241869	14.1104984412077
Oral cavity cancer	Vitamin D	MR Egger	9	0.641534498580149	1.00183720900121	0.994454678187639	1.00927454549111
Oral cavity cancer	Vitamin D	Weighted median	9	0.445113332433378	0.999062216198485	0.996659106381361	1.00147112031053
Oral cavity cancer	Vitamin D	Inverse variance weighted	9	0.140950751710284	0.99862793134217	0.996804235349296	1.00045496386488
Oral cavity cancer	Vitamin D	Simple mode	9	0.587978189137749	0.998893380262118	0.995059638908111	1.00274189216072
Oral cavity cancer	Vitamin D	Weighted mode	9	0.602890153197819	0.998920430733899	0.995022826737057	1.00283330203568
Oropharyngeal cancer	Vitamin D	MR Egger	9	0.379295492127777	1.00417125599788	0.99547831349664	1.01294010899191
Oropharyngeal cancer	Vitamin D	Weighted median	9	0.89814141160112	1.00017946382622	0.997435154393792	1.00293132385902
Oropharyngeal cancer	Vitamin D	Inverse variance weighted	9	0.726083629962949	1.00038414103158	0.998236933236993	1.00253596747047
Oropharyngeal cancer	Vitamin D	Simple mode	9	0.956625094884028	0.999887751258157	0.995975107890219	1.0038157652694
Oropharyngeal cancer	Vitamin D	Weighted mode	9	0.951921969031266	0.999871212427674	0.995822074288622	1.00393681487304
Mouth ulcers	Vitamin D	MR Egger	11	0.543084248824423	1.01825265212938	0.962708285025029	1.07700170414713
Mouth ulcers	Vitamin D	Weighted median	11	0.58646948439528	1.00578257610127	0.985102178917906	1.02689711995166
Mouth ulcers	Vitamin D	Inverse variance weighted	11	0.990583333318146	1.00008723255338	0.985704394820622	1.01467993647152
Mouth ulcers	Vitamin D	Simple mode	11	0.379631038814868	1.01429260163763	0.984059508222656	1.0454545412553
Mouth ulcers	Vitamin D	Weighted mode	11	0.399065151596038	1.01429260163763	0.98276466480117	1.04683198184071
Toothache	Vitamin D	MR Egger	11	0.423610438419612	0.984808250449286	0.950180105674156	1.02069837535156
Toothache	Vitamin D	Weighted median	11	0.237858975692635	0.992055581917644	0.979002908787794	1.00528228136989
Toothache	Vitamin D	Inverse variance weighted	11	0.115835765409902	0.992397353409391	0.983002081266444	1.00188242306175
Toothache	Vitamin D	Simple mode	11	0.986640119208673	1.00017679596603	0.980193540304775	1.02056745127889
Toothache	Vitamin D	Weighted mode	11	0.963215692817037	1.00050935137173	0.979613074967525	1.02185136944549
Loose teeth	Vitamin D	MR Egger	11	0.504269624223509	0.987379021387679	0.952664771022449	1.0233582279212
Loose teeth	Vitamin D	Weighted median	11	0.40493459878357	1.00533681338965	0.992822291724582	1.01800908055843
Loose teeth	Vitamin D	Inverse variance weighted	11	0.92185612680947	0.999524089364609	0.990062513500405	1.00907608519383
Loose teeth	Vitamin D	Simple mode	11	0.402239460406213	1.0090067005638	0.988937197419952	1.02948349444106
Loose teeth	Vitamin D	Weighted mode	11	0.395209046245031	1.0090067005638	0.989242189659648	1.02916609544617
Bleeding gums	Vitamin D	MR Egger	11	0.893062716220438	1.00428598398022	0.945214892724722	1.06704871599274
Bleeding gums	Vitamin D	Weighted median	11	0.370566519114731	0.990276611884132	0.969321455307821	1.0116847849337
Bleeding gums	Vitamin D	Inverse variance weighted	11	0.187468369097175	0.989224836663054	0.973416660893017	1.00528973540817
Bleeding gums	Vitamin D	Simple mode	11	0.666068120595326	0.992005951121481	0.957520416461742	1.02773349804573
Bleeding gums	Vitamin D	Weighted mode	11	0.608064380103529	0.990406930601624	0.955686062140597	1.02638923705411
Painful gums	Vitamin D	MR Egger	11	0.234107174245164	0.980552801362285	0.951401221059766	1.0105976059064
Painful gums	Vitamin D	Weighted median	11	0.897415244198813	1.00078595886597	0.988903921420203	1.01281076327909
Painful gums	Vitamin D	Inverse variance weighted	11	0.74886273484905	0.99869085530859	0.990713116407451	1.00673283512561
Painful gums	Vitamin D	Simple mode	11	0.85092162675233	1.00172740729737	0.984311023086352	1.01945195674464
Painful gums	Vitamin D	Weighted mode	11	0.899403277297341	1.00126480806812	0.982315506562011	1.02057964999904
Dental caries	Vitamin E	MR Egger	10	0.710214266853043	1.00252038857971	0.989757763657207	1.01544758366361
Dental caries	Vitamin E	Weighted median	10	0.86872994836595	0.9994855578014	0.993404805052753	1.00560353158401
Dental caries	Vitamin E	Inverse variance weighted	10	0.34425715069656	0.997903454102355	0.993572664282874	1.00225312099156
Dental caries	Vitamin E	Simple mode	10	0.973824670686074	1.00018341141264	0.98958287873032	1.01089749829599
Dental caries	Vitamin E	Weighted mode	10	0.973748673820172	1.00018341141264	0.989613417135262	1.01086630308721
Chronic periodontitis	Vitamin E	MR Egger	11	0.904253538441574	1.06386411361704	0.398988593367803	2.83668974766611
Chronic periodontitis	Vitamin E	Weighted median	11	0.492374535711911	0.779341185404785	0.382489894435974	1.58794439305064
Chronic periodontitis	Vitamin E	Inverse variance weighted	11	0.705257057989491	0.91077573863968	0.561154319517133	1.4782251819935
Chronic periodontitis	Vitamin E	Simple mode	11	0.910971538301682	0.938044275491908	0.314395531037025	2.79878998241713
Chronic periodontitis	Vitamin E	Weighted mode	11	0.606380619666079	0.813855979662733	0.381022383235508	1.73837964585767
Acute periodontitis	Vitamin E	MR Egger	11	0.578456772000429	0.450034554214215	0.0297980896450925	6.79678
Acute periodontitis	Vitamin E	Weighted median	11	0.306174757271654	2.89061389033374	0.378448436930106	22.0786977765574
Acute periodontitis	Vitamin E	Inverse variance weighted	11	0.371016686790752	1.87311381023382	0.473562535657511	7.40885328105029
Acute periodontitis	Vitamin E	Simple mode	11	0.290397739816682	7.74695163748716	0.212812148346097	282.010496769019
Acute periodontitis	Vitamin E	Weighted mode	11	0.236029178668309	0.177413802766297	0.0120619048728201	2.60950967064289
Diseases of pulp and periapical tissues	Vitamin E	MR Egger	11	0.386410514149213	0.713933430463496	0.345582567995081	1.47490351174377
Diseases of pulp and periapical tissues	Vitamin E	Weighted median	11	0.130491253276941	0.684460019222996	0.418729985102222	1.11882486228058
Diseases of pulp and periapical tissues	Vitamin E	Inverse variance weighted	11	0.0495609464722558	0.692677261812797	0.480136907468518	0.99930203566768
Diseases of pulp and periapical tissues	Vitamin E	Simple mode	11	0.246925528458622	0.64427678333205	0.31972524929339	1.29827898940753
Diseases of pulp and periapical tissues	Vitamin E	Weighted mode	11	0.223147785782617	0.682989613136784	0.384183744121524	1.21419716161957
Impacted teeth	Vitamin E	MR Egger	4	0.234987448459606	1.0691722284311	0.988910546353141	1.15594808677479
Impacted teeth	Vitamin E	Weighted median	4	0.342484048404106	0.997367606711878	0.991954283033619	1.00281
Impacted teeth	Vitamin E	Inverse variance weighted	4	0.167080759003737	0.996812035252549	0.992307019017144	1.00133750400002
Impacted teeth	Vitamin E	Simple mode	4	0.232535720007513	0.993299400623261	0.984564640535826	1.00211165286372
Impacted teeth	Vitamin E	Weighted mode	4	0.974542769981733	1.00014192468191	0.992143123599783	1.00820521325302
Cleft lip and cleft palate	Vitamin E	MR Egger	11	0.751303138457089	2.24469692879561	0.017577882555701	286.647967192743
Cleft lip and cleft palate	Vitamin E	Weighted median	11	0.775688427485757	1.50499466904349	0.0904367792976089	25.0452191181604
Cleft lip and cleft palate	Vitamin E	Inverse variance weighted	11	0.360191241846592	2.48936857011632	0.352887695179818	17.5607026329588
Cleft lip and cleft palate	Vitamin E	Simple mode	11	0.56818782899214	3.3050374957173	0.0623565266666057	175.174491461005
Cleft lip and cleft palate	Vitamin E	Weighted mode	11	0.819052566036563	1.4398557376241	0.0687249317518542	30.1664111163429
Oral cavity cancer	Vitamin E	MR Egger	7	0.616518104075483	1.00230716746087	0.99385759971404	1.01083
Oral cavity cancer	Vitamin E	Weighted median	7	0.673457248555928	1.00058624791168	0.997862479506839	1.00331745112289
Oral cavity cancer	Vitamin E	Inverse variance weighted	7	0.886941789041698	0.999853516862319	0.997836310936266	1.00187480073152
Oral cavity cancer	Vitamin E	Simple mode	7	0.785349522936938	1.00057633159841	0.996617145017327	1.00455124654466
Oral cavity cancer	Vitamin E	Weighted mode	7	0.780215551196272	1.00060385243691	0.996555761086264	1.00466838746711
Oropharyngeal cancer	Vitamin E	MR Egger	8	0.334077075828506	0.995922079535817	0.988355779189656	1.00354630325546
Oropharyngeal cancer	Vitamin E	Weighted median	8	0.686133864041202	0.99941595152933	0.99658803680562	1.00225189073396
Oropharyngeal cancer	Vitamin E	Inverse variance weighted	8	0.179421014747376	0.998482702678374	0.99627170381997	1.00069860834677
Oropharyngeal cancer	Vitamin E	Simple mode	8	0.995316844934972	1.00001234003246	0.996043612172891	1.00399688125665
Oropharyngeal cancer	Vitamin E	Weighted mode	8	0.995382916071889	0.999986461567522	0.99557104913406	1.0044214565983
Mouth ulcers	Vitamin E	MR Egger	11	0.189684719446548	0.975382300968349	0.942364808651548	1.00955662213623
Mouth ulcers	Vitamin E	Weighted median	11	0.36328785361021	0.991247110006783	0.972636199870197	1.01021413065638
Mouth ulcers	Vitamin E	Inverse variance weighted	11	0.290838864576413	0.992454007905247	0.978602477782051	1.00650159811526
Mouth ulcers	Vitamin E	Simple mode	11	0.646475125279306	0.992559961068871	0.962305787074896	1.02376530365847
Mouth ulcers	Vitamin E	Weighted mode	11	0.659966688250974	0.992559961068871	0.961026508902605	1.02512809708237
Toothache	Vitamin E	MR Egger	9	0.46708773022797	0.986430001896537	0.952666693836987	1.02138990996163
Toothache	Vitamin E	Weighted median	9	0.662171025408985	1.00294067699761	0.989816139946003	1.01623923977569
Toothache	Vitamin E	Inverse variance weighted	9	0.584930295263217	1.00285782181157	0.992640445903532	1.01318036648527
Toothache	Vitamin E	Simple mode	9	0.717491308787855	1.0037902109942	0.984131356927738	1.02384176725481
Toothache	Vitamin E	Weighted mode	9	0.68358597615668	1.00388037487317	0.986017301527149	1.02206706261101
Loose teeth	Vitamin E	MR Egger	9	0.98831233105065	1.00030832624907	0.961273447795803	1.04092831218591
Loose teeth	Vitamin E	Weighted median	9	0.726768327574612	1.00268061870088	0.987736905653854	1.01785041883482
Loose teeth	Vitamin E	Inverse variance weighted	9	0.854354318206422	1.00095942309054	0.990762671519074	1.01126111779884
Loose teeth	Vitamin E	Simple mode	9	0.766939719579937	1.0039282528747	0.979083527357956	1.0294034255073
Loose teeth	Vitamin E	Weighted mode	9	0.755198343507626	1.0039282528747	0.980304260176733	1.02812155150519
Bleeding gums	Vitamin E	MR Egger	11	0.561743244251827	0.986037165152072	0.941945707587901	1.03219249605254
Bleeding gums	Vitamin E	Weighted median	11	0.940210443155349	1.00086173516283	0.978585281664631	1.02364528844042
Bleeding gums	Vitamin E	Inverse variance weighted	11	0.932838787793737	0.999328224945269	0.983831057182044	1.01506950190481
Bleeding gums	Vitamin E	Simple mode	11	0.930207511039224	1.00173894420105	0.964468728755042	1.0404494022573
Bleeding gums	Vitamin E	Weighted mode	11	0.896494462161438	1.00244	0.967141590364806	1.03903447208794
Painful gums	Vitamin E	MR Egger	9	0.171231046253097	0.977420404422966	0.949136407406555	1.0065472565664
Painful gums	Vitamin E	Weighted median	9	0.288764413691736	1.00687581778501	0.994208839692111	1.01970418282963
Painful gums	Vitamin E	Inverse variance weighted	9	0.459365431160079	1.00326469151302	0.994639597757141	1.01196457843265
Painful gums	Vitamin E	Simple mode	9	0.350560179231339	1.01023370132177	0.9901002463348	1.03077656536729
Painful gums	Vitamin E	Weighted mode	9	0.395163537592125	1.00967942033551	0.98868377295735	1.03112093040596
Dental caries	betacarotene	Wald ratio	1	0.28744522274271	1.00132999103721	0.998880786518668	1.00378520087977
Chronic periodontitis	betacarotene	Wald ratio	1	0.964418438433886	0.991978652808412	0.696347793419769	1.41311806675663
Acute periodontitis	betacarotene	Wald ratio	1	0.24229453043708	1.8270169662631	0.665264568685931	5.01753911471134
Diseases of pulp and periapical tissues	betacarotene	Wald ratio	1	0.582991993727739	0.927587837727907	0.709271580514711	1.21310259756402
Impacted teeth	betacarotene	Wald ratio	1	0.645436393266472	0.999623570196343	0.998021626411594	1.00122808529199
Cleft lip and cleft palate	betacarotene	Wald ratio	1	0.109150731656297	0.31042943754502	0.0741998397443634	1.29874183052852
Oral cavity cancer	betacarotene	Wald ratio	1	0.0576757793435033	1.0009150828626	0.999970198752791	1.00186085980501
Oropharyngeal cancer	betacarotene	Wald ratio	1	0.597545179684459	0.99970100980715	0.998591764924431	1.00081148684925
Mouth ulcers	betacarotene	Wald ratio	1	0.294311551032868	1.00445	0.996152980690964	1.01280711131684
Toothache	betacarotene	Wald ratio	1	0.836732421046476	1.00057245170744	0.995141040037797	1.00603350765014
Loose teeth	betacarotene	Wald ratio	1	0.342868073341344	0.997369653359394	0.991956227686764	1.0028126218452
Bleeding gums	betacarotene	Wald ratio	1	0.931954786772158	1.0004016631954	0.991222139207573	1.00966619704864
Painful gums	betacarotene	Wald ratio	1	0.263278932552931	1.00262276902702	0.998032006962194	1.00723464774561
Dental caries	calcium	MR Egger	213	0.659968468636492	0.999418309479495	0.996834649073031	1.00200866638382
Dental caries	calcium	Weighted median	213	0.500233060121632	0.999223729791849	0.996970160333817	1.00148239325921
Dental caries	calcium	Inverse variance weighted	213	0.544232796114501	1.00037499302304	0.999163500582171	1.00158795440661
Dental caries	calcium	Simple mode	213	0.695954285796535	0.999039364952127	0.994241702674224	1.00386017810297
Dental caries	calcium	Weighted mode	213	0.44265427608453	0.999039364952127	0.996595612229661	1.00148911000217
Chronic periodontitis	calcium	MR Egger	206	0.721976289766975	0.939232517034316	0.665277661040589	1.32599931233945
Chronic periodontitis	calcium	Weighted median	206	0.730005165397796	0.940676797932912	0.664665554451274	1.33130539448496
Chronic periodontitis	calcium	Inverse variance weighted	206	0.626714249750542	1.04052525489557	0.886594785047751	1.22118111265135
Chronic periodontitis	calcium	Simple mode	206	0.989684585437506	0.994788916591212	0.450984805288261	2.19432002357636
Chronic periodontitis	calcium	Weighted mode	206	0.648990617014379	0.92280540052934	0.6532671712269	1.30355518347384
Acute periodontitis	calcium	MR Egger	206	0.099849440316747	0.438525669122844	0.165015572971955	1.16537341910342
Acute periodontitis	calcium	Weighted median	206	0.510516108508602	0.725092232570292	0.27833320899203	1.88895442134907
Acute periodontitis	calcium	Inverse variance weighted	206	0.882896158768463	1.03489925556982	0.655631883590897	1.63356373596874
Acute periodontitis	calcium	Simple mode	206	0.517514436390986	1.84760816606036	0.288784776936329	11.8207613694456
Acute periodontitis	calcium	Weighted mode	206	0.494856125780424	0.737901419366468	0.308782554727553	1.76337197929939
Diseases of pulp and periapical tissues	calcium	MR Egger	205	0.0302709578465027	0.748977960194958	0.577692465422319	0.971049508924628
Diseases of pulp and periapical tissues	calcium	Weighted median	205	0.046328421110666	0.77902683153331	0.609351355999648	0.995948886095822
Diseases of pulp and periapical tissues	calcium	Inverse variance weighted	205	0.0341107444861252	0.877069685322498	0.776849148719492	0.99021957374825
Diseases of pulp and periapical tissues	calcium	Simple mode	205	0.598585353781224	0.874978856378071	0.532576498012747	1.4375174307642
Diseases of pulp and periapical tissues	calcium	Weighted mode	205	0.0818382359654405	0.786244150270812	0.600475567662195	1.02948379105882
Impacted teeth	calcium	MR Egger	123	0.452264141655905	0.99874221687173	0.995480404444332	1.00201471702363
Impacted teeth	calcium	Weighted median	123	0.32316912200263	1.00080015293631	0.999213375305912	1.00238945041214
Impacted teeth	calcium	Inverse variance weighted	123	0.177300784434375	1.00069696634073	0.999684568606981	1.00171038934706
Impacted teeth	calcium	Simple mode	123	0.715879974416986	0.999307416876636	0.995594673210267	1.00303400600231
Impacted teeth	calcium	Weighted mode	123	0.835929690459376	1.00029264831146	0.997532376637921	1.00306055793229
Cleft lip and cleft palate	calcium	MR Egger	206	0.134360550769797	2.87849426619582	0.725145895670173	11.426292681233
Cleft lip and cleft palate	calcium	Weighted median	206	0.210622108975029	2.4217757668823	0.606324664020637	9.67303197954478
Cleft lip and cleft palate	calcium	Inverse variance weighted	206	0.0698569246871326	1.81894137058596	0.952595233595931	3.47319364294922
Cleft lip and cleft palate	calcium	Simple mode	206	0.621488935495825	1.88873145136585	0.151887562812921	23.4864950711757
Cleft lip and cleft palate	calcium	Weighted mode	206	0.161327498550471	2.41132952522614	0.706751550175099	8.22709207752958
Oral cavity cancer	calcium	MR Egger	197	0.630911878273148	0.999637665260925	0.998163185900189	1.00111432271179
Oral cavity cancer	calcium	Weighted median	197	0.12796152416058	0.999431996799646	0.998701100424844	1.00016342807875
Oral cavity cancer	calcium	Inverse variance weighted	197	0.162175145577655	0.999656351655351	0.99917468333368	1.00013825217303
Oral cavity cancer	calcium	Simple mode	197	0.472852670495732	0.999285843960312	0.997342272897563	1.00123320255777
Oral cavity cancer	calcium	Weighted mode	197	0.424515606094026	0.999430304336613	0.998036414488458	1.00082614093629
Oropharyngeal cancer	calcium	MR Egger	197	0.277456618855799	0.999079967170691	0.997426351630867	1.00073632421053
Oropharyngeal cancer	calcium	Weighted median	197	0.431005591718427	0.999659952012764	0.998814082292979	1.00050653807766
Oropharyngeal cancer	calcium	Inverse variance weighted	197	0.903163189349456	0.9999648339499	0.999398492697606	1.00053149613765
Oropharyngeal cancer	calcium	Simple mode	197	0.871203582896937	1.00020431137726	0.997740395176855	1.00267431220958
Oropharyngeal cancer	calcium	Weighted mode	197	0.220376082636228	0.99885058762034	0.997020919185938	1.00068361374415
Mouth ulcers	calcium	MR Egger	210	0.926682394540332	0.9995473413258	0.989965885088426	1.0092215323786
Mouth ulcers	calcium	Weighted median	210	0.944556706173345	1.00030399335412	0.991771648198625	1.00890974342493
Mouth ulcers	calcium	Inverse variance weighted	210	0.988045598538431	0.999965303337318	0.995436880340285	1.00451432695228
Mouth ulcers	calcium	Simple mode	210	0.538601052611302	1.00556134651908	0.987971124891555	1.02346475128437
Mouth ulcers	calcium	Weighted mode	210	0.605613494527518	1.00217151483917	0.993965967850628	1.0104448015729
Toothache	calcium	MR Egger	213	0.0954404027921315	0.995282290874246	0.989789706429213	1.00080535500975
Toothache	calcium	Weighted median	213	0.160341899106394	0.996534253144347	0.991715845078179	1.00137607220713
Toothache	calcium	Inverse variance weighted	213	0.88755842542267	1.00017687948211	0.997727773137081	1.00263199760915
Toothache	calcium	Simple mode	213	0.370261730275157	0.995301792495497	0.985122658202252	1.00558610635607
Toothache	calcium	Weighted mode	213	0.117922438228779	0.995935298967974	0.990883854132107	1.00101249565642
Loose teeth	calcium	MR Egger	211	0.0295629399451907	0.992962848000631	0.98670918182193	0.999256149303232
Loose teeth	calcium	Weighted median	211	0.0139170474037514	0.993396517196417	0.988165153764725	0.998655575556685
Loose teeth	calcium	Inverse variance weighted	211	0.0162551163950266	0.996361871349338	0.993404413000398	0.999328134329877
Loose teeth	calcium	Simple mode	211	0.13481727891415	0.990920913739716	0.979190454921199	1.00279190054582
Loose teeth	calcium	Weighted mode	211	0.00413332346358956	0.992060953469251	0.986729999442373	0.997420708759749
Bleeding gums	calcium	MR Egger	212	0.1735460947824	0.99297289824398	0.982972864437959	1.00307466494593
Bleeding gums	calcium	Weighted median	212	0.790105257103598	0.998748160308326	0.989578234024606	1.00800305971005
Bleeding gums	calcium	Inverse variance weighted	212	0.677130950101886	0.998987339376819	0.994234277683922	1.00376312367742
Bleeding gums	calcium	Simple mode	212	0.573685494072934	0.994304312646398	0.974745068831607	1.01425603243346
Bleeding gums	calcium	Weighted mode	212	0.603112759153077	0.997474810766112	0.988026861786644	1.00701310520416
Dental caries	copper	Inverse variance weighted	2	0.17211652648066	1.00086517946442	0.999623499581716	1.00210840169675
Chronic periodontitis	copper	Inverse variance weighted	2	0.450316891933614	1.06957661008676	0.898184733469585	1.27367353531557
Acute periodontitis	copper	Inverse variance weighted	2	0.708963546125354	1.0997102742489	0.667602585629781	1.81150090386146
Diseases of pulp and periapical tissues	copper	Inverse variance weighted	2	0.958855694703406	0.996520397803518	0.87291792210775	1.1376246014524
Impacted teeth	copper	Wald ratio	1	0.367618210959338	1.00066748529549	0.999215942685211	1.00212113653501
Cleft lip and cleft palate	copper	Inverse variance weighted	2	0.777259477529387	0.902906387893915	0.444955175291724	1.8321844324322
Oral cavity cancer	copper	Inverse variance weighted	2	0.8595692837907	1.00004324821123	0.999564236015506	1.00052248995968
Oropharyngeal cancer	copper	Inverse variance weighted	2	0.602925450264691	1.00014947963379	0.999586387531723	1.00071288893978
Mouth ulcers	copper	Inverse variance weighted	2	0.796729958295884	0.999447300869535	0.995251671997829	1.00366061702791
Toothache	copper	Inverse variance weighted	2	0.853964761238007	1.00025947759154	0.99749986457003	1.00302672516449
Loose teeth	copper	Inverse variance weighted	2	0.108803142487032	0.99774257842645	0.99499035763395	1.00050241207593
Bleeding gums	copper	Inverse variance weighted	2	0.163420380202928	1.00333206612231	0.998649115422266	1.00803697651463
Painful gums	copper	Inverse variance weighted	2	0.63734782458195	0.999439917292797	0.997114601832095	1.00177065549225
Dental caries	iron	Inverse variance weighted	2	0.748152986366453	1.00023717680283	0.998790212053901	1.00168623779475
Chronic periodontitis	iron	Inverse variance weighted	2	0.533149878723513	0.926629201850302	0.729162297754012	1.17757278505285
Acute periodontitis	iron	Inverse variance weighted	2	0.182034769834409	1.59486022854479	0.803497414668454	3.16563451500772
Diseases of pulp and periapical tissues	iron	Inverse variance weighted	2	0.620158695526129	0.955100162522961	0.796435096332216	1.14537433703308
Impacted teeth	iron	Wald ratio	1	0.715532533998527	1.00024815122641	0.998914275130079	1.00158380848203
Cleft lip and cleft palate	iron	Inverse variance weighted	2	0.74542423927584	1.17547674610639	0.442945556905076	3.11944788495302
Oral cavity cancer	iron	Inverse variance weighted	2	0.578455604787911	0.999840664913152	0.999278820892113	1.00040282483071
Oropharyngeal cancer	iron	Inverse variance weighted	2	0.219394986319228	1.00041413938475	0.999753291216019	1.00107542438155
Mouth ulcers	iron	Inverse variance weighted	2	0.113912407522954	1.00398585378872	0.999046389670711	1.00894973950119
Toothache	iron	Inverse variance weighted	2	0.276755769556398	1.00179877921776	0.998559581739623	1.00504848423144
Loose teeth	iron	Inverse variance weighted	2	0.933648226223224	0.99986245755707	0.996629902075706	1.00310549778801
Bleeding gums	iron	Inverse variance weighted	2	0.00585182624028606	0.992317406357272	0.986889615360528	0.997775049644126
Painful gums	iron	Inverse variance weighted	2	0.324863376335369	1.00137253903036	0.998641899693766	1.00411064489845
Dental caries	magnesium	MR Egger	5	0.738231850755602	1.01390876136716	0.941734288849597	1.09161468213383
Dental caries	magnesium	Weighted median	5	0.340917010919375	1.01486525557366	0.984508723796021	1.04615780650409
Dental caries	magnesium	Inverse variance weighted	5	0.407344570563086	1.01058112532103	0.985730118487679	1.03605864495849
Dental caries	magnesium	Simple mode	5	0.208733207797311	1.03567396294978	0.989218032161978	1.08431157000631
Dental caries	magnesium	Weighted mode	5	0.995015927806967	1.00012138038873	0.964952885558817	1.0365716196925
Chronic periodontitis	magnesium	MR Egger	5	0.910650012233061	1.88006880591201	7.37144592079458e-05	47950.6836642761
Chronic periodontitis	magnesium	Weighted median	5	0.354397782400436	7.11678603194152	0.111813518936841	452.974236979766
Chronic periodontitis	magnesium	Inverse variance weighted	5	0.327847410896123	6.00024498585695	0.165721836169256	217.249221481777
Chronic periodontitis	magnesium	Simple mode	5	0.668471622391048	3.65325362008212	0.014878766440142	897.000572348236
Chronic periodontitis	magnesium	Weighted mode	5	0.517208202173279	5.38571227867981	0.0514099520997623	564.207815102333
Acute periodontitis	magnesium	MR Egger	5	0.929018824660617	0.239991433924203	6.6872367367325e-14	861280834288.774
Acute periodontitis	magnesium	Weighted median	5	0.48260282234475	67.0023755278882	0.000535172375935563	8388546.43521565
Acute periodontitis	magnesium	Inverse variance weighted	5	0.590679109380781	16.5594879595597	0.000597983020746889	458569.277001048
Acute periodontitis	magnesium	Simple mode	5	0.681254254570878	41.5185484239508	2.78157482051379e-06	619717237.343104
Acute periodontitis	magnesium	Weighted mode	5	0.562389418127561	69.4428340952945	0.000131767849942525	36596993.9502695
Diseases of pulp and periapical tissues	magnesium	MR Egger	5	0.938786178257178	1.38643057415956	0.000641439238263036	2996.68249508644
Diseases of pulp and periapical tissues	magnesium	Weighted median	5	0.604526310727461	0.4309409775409	0.0178185884743538	10.4222692157237
Diseases of pulp and periapical tissues	magnesium	Inverse variance weighted	5	0.49608244673961	0.389511226465345	0.0257875444423736	5.88342158291099
Diseases of pulp and periapical tissues	magnesium	Simple mode	5	0.776504883070044	0.539626235689114	0.0100702359864895	28.9165491885871
Diseases of pulp and periapical tissues	magnesium	Weighted mode	5	0.672453354947386	0.437468429208727	0.0124616676582111	15.3573848864642
Impacted teeth	magnesium	MR Egger	4	0.694331665855812	1.01740735247389	0.94436281307862	1.09610173815871
Impacted teeth	magnesium	Weighted median	4	0.692032106238189	0.995536049125384	0.973738802376683	1.01782122956294
Impacted teeth	magnesium	Inverse variance weighted	4	0.556686544914063	0.994621192064859	0.976893043779972	1.01267106158997
Impacted teeth	magnesium	Simple mode	4	0.233140066802878	0.969545831470984	0.93087831909607	1.00982
Impacted teeth	magnesium	Weighted mode	4	0.826772716266285	0.99705457242084	0.973186937648453	1.0215075664573
Cleft lip and cleft palate	magnesium	MR Egger	5	0.856836233107901	60.6339168416625	9.85026688928111e-17	37323576232866652160
Cleft lip and cleft palate	magnesium	Weighted median	5	0.835827366016368	6.14910355564226	2.12956628256583e-07	177554814.083808
Cleft lip and cleft palate	magnesium	Inverse variance weighted	5	0.939176557726037	1.75854040122893	8.87282781211713e-07	3485319.90954586
Cleft lip and cleft palate	magnesium	Simple mode	5	0.659269206554995	0.00449501235067068	9.46736751536384e-13	21341873.5460439
Cleft lip and cleft palate	magnesium	Weighted mode	5	0.767353724526245	20.1994868823122	1.67986294203201e-07	2428884286.32845
Oral cavity cancer	magnesium	MR Egger	5	0.999959607097701	1.00000075726057	0.973350967928029	1.02738020248791
Oral cavity cancer	magnesium	Weighted median	5	0.704744822691135	1.00216151802455	0.991031151909643	1.01341689035104
Oral cavity cancer	magnesium	Inverse variance weighted	5	0.562176623067482	1.00285084791897	0.993243081900349	1.01255155107409
Oral cavity cancer	magnesium	Simple mode	5	0.853637656050947	1.00151264816782	0.986543126588803	1.01670931296062
Oral cavity cancer	magnesium	Weighted mode	5	0.848857977130867	1.00137799835614	0.988168512717128	1.0147640637066
Oropharyngeal cancer	magnesium	MR Egger	5	0.443767584507589	1.01435361198923	0.982652730436039	1.04707718025576
Oropharyngeal cancer	magnesium	Weighted median	5	0.950799938097763	0.99954998105956	0.985359833953961	1.01394448018758
Oropharyngeal cancer	magnesium	Inverse variance weighted	5	0.705124436700052	0.99781761927196	0.98658988652408	1.00917
Oropharyngeal cancer	magnesium	Simple mode	5	0.737696296443666	0.996509368690715	0.977669130720525	1.01571266871904
Oropharyngeal cancer	magnesium	Weighted mode	5	0.94228375665382	1.00055969408493	0.986419096817962	1.01490300082062
Mouth ulcers	magnesium	MR Egger	5	0.549689792006922	0.921457045433284	0.725880941799145	1.16972775793524
Mouth ulcers	magnesium	Weighted median	5	0.751057504746015	0.982633608852732	0.881831478332233	1.09495842796753
Mouth ulcers	magnesium	Inverse variance weighted	5	0.446647700113397	1.03333766943642	0.949644899688614	1.12440633275282
Mouth ulcers	magnesium	Simple mode	5	0.183796249407131	1.15608879419215	0.968412008503575	1.38013705769915
Mouth ulcers	magnesium	Weighted mode	5	0.635158471579943	0.968580013548296	0.857305579882616	1.09429737150862
Toothache	magnesium	MR Egger	5	0.318654942037616	0.905251649675819	0.768668003991684	1.06610467065786
Toothache	magnesium	Weighted median	5	0.938277300298321	1.00306972018692	0.928193459060717	1.0839861601417
Toothache	magnesium	Inverse variance weighted	5	0.83282174954824	0.994044447415975	0.940410874795228	1.05073685335008
Toothache	magnesium	Simple mode	5	0.466793482282081	1.05538109992469	0.925328643480484	1.2037120799468
Toothache	magnesium	Weighted mode	5	0.166384494168538	0.935676174825233	0.866221103192645	1.01070027145353
Loose teeth	magnesium	MR Egger	5	0.510106724481635	0.937615290296879	0.791528669621113	1.11066404331168
Loose teeth	magnesium	Weighted median	5	0.376928060351301	0.969011315148953	0.903654704464605	1.0390948270922
Loose teeth	magnesium	Inverse variance weighted	5	0.297076112155595	0.970927760988545	0.918548882579264	1.02629346672454
Loose teeth	magnesium	Simple mode	5	0.67917325067076	1.02530080999982	0.918509429940688	1.14450839231358
Loose teeth	magnesium	Weighted mode	5	0.32744608575847	0.955802610596809	0.882771314358672	1.03487575498233
Bleeding gums	magnesium	MR Egger	5	0.479850647520015	0.897444523336764	0.68952577658868	1.16805883088486
Bleeding gums	magnesium	Weighted median	5	0.18213194093597	0.92692605250867	0.829150837280636	1.03623112730272
Bleeding gums	magnesium	Inverse variance weighted	5	0.192270425799115	0.939426024137678	0.855204236361472	1.03194209909656
Bleeding gums	magnesium	Simple mode	5	0.385817622095863	0.927863170654841	0.79791811674223	1.07897044244677
Bleeding gums	magnesium	Weighted mode	5	0.238558034364845	0.913400548729675	0.803437558201111	1.0384136936387
Painful gums	magnesium	MR Egger	5	0.687352254217007	1.03014483875907	0.903468470601342	1.17458
Painful gums	magnesium	Weighted median	5	0.148486624831479	0.959488530215484	0.907145197064882	1.01485213457976
Painful gums	magnesium	Inverse variance weighted	5	0.11386930949661	0.96297978296308	0.918983067706013	1.00908286015589
Painful gums	magnesium	Simple mode	5	0.14284872705186	0.929173627651355	0.858505120521966	1.00565926711987
Painful gums	magnesium	Weighted mode	5	0.420383823430405	0.970933517173518	0.910333566642784	1.03556754283769
Dental caries	phosphorus	MR Egger	4	0.666944541870987	1.00674728793335	0.980531358752365	1.0336641380351
Dental caries	phosphorus	Weighted median	4	0.91704903574954	1.00030039598901	0.99466242740134	1.00597032184069
Dental caries	phosphorus	Inverse variance weighted	4	0.771741634446488	1.00076076549093	0.995632001045807	1.00591594956169
Dental caries	phosphorus	Simple mode	4	0.822530351000902	0.998947815658742	0.990557007384069	1.00740970077501
Dental caries	phosphorus	Weighted mode	4	0.513753278047523	1.00268578114595	0.99557315291087	1.00984922380915
Chronic periodontitis	phosphorus	MR Egger	4	0.756630267134847	2.80901364652845	0.00935307454195534	843.632500841108
Chronic periodontitis	phosphorus	Weighted median	4	0.437704555781158	0.686487893616601	0.265487823217117	1.77509319399841
Chronic periodontitis	phosphorus	Inverse variance weighted	4	0.35575538809769	0.713021776941513	0.347798995893269	1.46176400851039
Chronic periodontitis	phosphorus	Simple mode	4	0.349218519076875	0.394114116834812	0.0757544175627261	2.05038784648923
Chronic periodontitis	phosphorus	Weighted mode	4	0.192224493332898	0.394114116834812	0.132701476926785	1.17049139682282
Acute periodontitis	phosphorus	MR Egger	4	0.468522352511543	0.00855718799348531	2.31767154354198e-07	315.944105884575
Acute periodontitis	phosphorus	Weighted median	4	0.992907141518365	0.989087310744195	0.0880169065676921	11.1148385739142
Acute periodontitis	phosphorus	Inverse variance weighted	4	0.788242281990082	0.75535810954499	0.0974994935854682	5.85198807371468
Acute periodontitis	phosphorus	Simple mode	4	0.99933288239498	0.998380007360421	0.0300998756878137	33.1151746085299
Acute periodontitis	phosphorus	Weighted mode	4	0.977320499272416	1.04532875779388	0.0625740292040893	17.4627113799391
Diseases of pulp and periapical tissues	phosphorus	MR Egger	4	0.251958887830585	0.104032878525417	0.00643731426676758	1.6812663427288
Diseases of pulp and periapical tissues	phosphorus	Weighted median	4	0.883447583090502	0.950909036947201	0.485136287846329	1.86386386506357
Diseases of pulp and periapical tissues	phosphorus	Inverse variance weighted	4	0.967634060139118	0.988822469413672	0.574527602138596	1.70186753843983
Diseases of pulp and periapical tissues	phosphorus	Simple mode	4	0.936396114238135	0.959172910697114	0.373675011098061	2.46206635523118
Diseases of pulp and periapical tissues	phosphorus	Weighted mode	4	0.812064348327073	0.902255006969344	0.414843282020127	1.96234128135587
Impacted teeth	phosphorus	Inverse variance weighted	2	0.273569237059291	0.997738948531106	0.993704085822924	1.00179019450399
Cleft lip and cleft palate	phosphorus	MR Egger	4	0.390396097080653	5563.75271696199	0.000989522475560236	31283113885.7921
Cleft lip and cleft palate	phosphorus	Weighted median	4	0.277506793455288	0.147133800330102	0.00462937944735319	4.67629742728385
Cleft lip and cleft palate	phosphorus	Inverse variance weighted	4	0.0879087147393687	0.0789896561959486	0.00427956916506269	1.45794250432748
Cleft lip and cleft palate	phosphorus	Simple mode	4	0.390555624516876	0.0512125429759039	0.000152224514982714	17.2293178819235
Cleft lip and cleft palate	phosphorus	Weighted mode	4	0.61397720513744	0.347865581784881	0.00869334282074866	13.9199000299073
Oral cavity cancer	phosphorus	MR Egger	4	0.738041070079004	1.00220499979473	0.990997268139259	1.01353948583479
Oral cavity cancer	phosphorus	Weighted median	4	0.642534633607102	1.00055854636008	0.998202092722621	1.00292056287282
Oral cavity cancer	phosphorus	Inverse variance weighted	4	0.880859561351624	1.00015145077187	0.998172715077543	1.00213410902879
Oral cavity cancer	phosphorus	Simple mode	4	0.486124891443121	0.998408207661266	0.994480623983322	1.00235130286671
Oral cavity cancer	phosphorus	Weighted mode	4	0.478367165247381	1.0011376446338	0.998379223603777	1.00390368690272
Oropharyngeal cancer	phosphorus	MR Egger	4	0.509893433033352	0.995130177978526	0.983227594586016	1.00717684956811
Oropharyngeal cancer	phosphorus	Weighted median	4	0.465095676123707	1.00102711805128	0.998273574924199	1.0037882562905
Oropharyngeal cancer	phosphorus	Inverse variance weighted	4	0.742128868843664	1.00039087225677	0.998064776207889	1.00272238951974
Oropharyngeal cancer	phosphorus	Simple mode	4	0.547908670243752	1.00130150443142	0.997528341108935	1.00508893979096
Oropharyngeal cancer	phosphorus	Weighted mode	4	0.465518033408216	1.00137854963321	0.998141459859981	1.00462613766807
Mouth ulcers	phosphorus	MR Egger	4	0.313767420922601	0.900877955232738	0.772802695147918	1.05017890765634
Mouth ulcers	phosphorus	Weighted median	4	0.447565142046441	0.990102981652354	0.965011850314218	1.01584650380996
Mouth ulcers	phosphorus	Inverse variance weighted	4	0.31806047409991	0.984094792846003	0.953604206068304	1.01556028711271
Mouth ulcers	phosphorus	Simple mode	4	0.971183452114267	0.998928848069519	0.946826951864121	1.0539
Mouth ulcers	phosphorus	Weighted mode	4	0.054329869038114	0.961518023012912	0.937769439388858	0.985868028692815
Toothache	phosphorus	MR Egger	4	0.55551642946735	0.979250694962826	0.923547836867411	1.03831321487124
Toothache	phosphorus	Weighted median	4	0.878056126462494	1.00101127218409	0.988169599391612	1.01401982782765
Toothache	phosphorus	Inverse variance weighted	4	0.759338605599054	1.00178595042283	0.990414413469824	1.01328805075507
Toothache	phosphorus	Simple mode	4	0.475759077398718	1.00784790102373	0.989031139297112	1.02702266009524
Toothache	phosphorus	Weighted mode	4	0.90051984835928	0.998927566896553	0.983585848197135	1.01450858177239
Loose teeth	phosphorus	MR Egger	4	0.544125121126288	0.964916453655947	0.876033872387015	1.0628170803476
Loose teeth	phosphorus	Weighted median	4	0.584853769053814	1.00422182628072	0.989157322672177	1.01951575675976
Loose teeth	phosphorus	Inverse variance weighted	4	0.635027452453269	1.00276811925758	0.991387138754084	1.01427975176588
Loose teeth	phosphorus	Simple mode	4	0.380656494350115	1.01518826920851	0.986353023184557	1.04486649071256
Loose teeth	phosphorus	Weighted mode	4	0.255353767339652	0.989331399847936	0.974611698883052	1.00427341457813
Bleeding gums	phosphorus	MR Egger	4	0.223567040893851	1.09216927407756	0.989048153478013	1.20604211134157
Bleeding gums	phosphorus	Weighted median	4	0.49662017948966	1.00793608204656	0.985224576565732	1.03117113565386
Bleeding gums	phosphorus	Inverse variance weighted	4	0.560912156518533	1.00575202669911	0.986494947287095	1.0253850179275
Bleeding gums	phosphorus	Simple mode	4	0.473491077482633	0.985154432318493	0.950455938968249	1.02112
Bleeding gums	phosphorus	Weighted mode	4	0.348888558533262	1.01553341304579	0.98820555156437	1.04361699990436
Painful gums	phosphorus	MR Egger	4	0.508696148056305	0.971011233190159	0.903304945389579	1.04379237575726
Painful gums	phosphorus	Weighted median	4	0.190460138974498	1.00832010495025	0.995889858617659	1.02090549998985
Painful gums	phosphorus	Inverse variance weighted	4	0.329505939524184	1.00480017303422	0.995174955560989	1.01451848450152
Painful gums	phosphorus	Simple mode	4	0.268622771739842	1.01596846229703	0.99293946631131	1.03953156401034
Painful gums	phosphorus	Weighted mode	4	0.339797140374035	0.992622359140827	0.979981121758806	1.00542666178911
Dental caries	selenium	MR Egger	7	0.751661618458674	0.999275391424986	0.99503859706613	1.00353022571364
Dental caries	selenium	Weighted median	7	0.181204543978279	0.999126131851099	0.997846501728543	1.00040740296077
Dental caries	selenium	Inverse variance weighted	7	0.0823527679132669	0.999129187455388	0.998147598689204	1.00011174152621
Dental caries	selenium	Simple mode	7	0.405358441861472	0.999259522687914	0.997639465213617	1.00088221095852
Dental caries	selenium	Weighted mode	7	0.285653804799812	0.999090535403134	0.997571327287842	1.00061205713073
Chronic periodontitis	selenium	MR Egger	5	0.429165078537207	1.55212081822539	0.603185726816026	3.9939257964296
Chronic periodontitis	selenium	Weighted median	5	0.163407028639719	1.13712963185652	0.949124181746229	1.3623757823419
Chronic periodontitis	selenium	Inverse variance weighted	5	0.0470380897855824	1.16635566280705	1.00201333698576	1.35765212093321
Chronic periodontitis	selenium	Simple mode	5	0.478501736749947	1.0959857574247	0.870753914378132	1.37947675071395
Chronic periodontitis	selenium	Weighted mode	5	0.457850045937211	1.09448860735177	0.882226867789313	1.35782002947216
Acute periodontitis	selenium	MR Egger	5	0.372773586387435	0.212445489260086	0.0116291081646297	3.88104446772892
Acute periodontitis	selenium	Weighted median	5	0.441900312951683	0.813608382353109	0.480930021994179	1.3764135519975
Acute periodontitis	selenium	Inverse variance weighted	5	0.298603605897981	0.794571947349843	0.515015176895988	1.22587567869447
Acute periodontitis	selenium	Simple mode	5	0.988346760908597	0.993788088655931	0.45283003788438	2.18098333266172
Acute periodontitis	selenium	Weighted mode	5	0.658554350853763	0.860969007351731	0.465148874770714	1.59361372632712
Diseases of pulp and periapical tissues	selenium	MR Egger	5	0.89952872307094	1.05152311486184	0.513131704039193	2.15480909167189
Diseases of pulp and periapical tissues	selenium	Weighted median	5	0.705488765639472	0.974289462812393	0.851179325427345	1.11520560825497
Diseases of pulp and periapical tissues	selenium	Inverse variance weighted	5	0.475713691887504	0.958920376448064	0.85451305392495	1.07608454211872
Diseases of pulp and periapical tissues	selenium	Simple mode	5	0.58278739192214	0.947264410423411	0.792859876461595	1.13173826787573
Diseases of pulp and periapical tissues	selenium	Weighted mode	5	0.909343485766614	0.99051758746342	0.849125932014384	1.15545298298313
Impacted teeth	selenium	Inverse variance weighted	2	0.865791966699698	0.999925657073953	0.999063889023124	1.0007881684648
Cleft lip and cleft palate	selenium	MR Egger	5	0.383886120663382	0.138045442204352	0.00304247469857602	6.26350126175717
Cleft lip and cleft palate	selenium	Weighted median	5	0.216304269436035	0.622295491016492	0.293382619003271	1.31995439762278
Cleft lip and cleft palate	selenium	Inverse variance weighted	5	0.0981643362418163	0.596249460413284	0.323057376453319	1.10046525773883
Cleft lip and cleft palate	selenium	Simple mode	5	0.781488585684479	0.842402993508777	0.271298152530239	2.61573032051315
Cleft lip and cleft palate	selenium	Weighted mode	5	0.122512265335157	0.415734183931335	0.172304374922516	1.00307906730038
Oral cavity cancer	selenium	MR Egger	7	0.240439897643438	0.999003156561287	0.997537797464949	1.00047066823499
Oral cavity cancer	selenium	Weighted median	7	0.186882687969592	0.999673305720442	0.999188358662404	1.00015848814316
Oral cavity cancer	selenium	Inverse variance weighted	7	0.106566972859526	0.999687341113547	0.999307744788188	1.0000670816321
Oral cavity cancer	selenium	Simple mode	7	0.364238283249235	0.999706193222805	0.999119751972525	1.00029297868942
Oral cavity cancer	selenium	Weighted mode	7	0.250269056036954	0.99966435127355	0.999147595641531	1.00018137416977
Oropharyngeal cancer	selenium	MR Egger	7	0.703268948500062	0.999572216680362	0.997496776763981	1.00165197485716
Oropharyngeal cancer	selenium	Weighted median	7	0.143215202337635	0.999561362962089	0.998974386685389	1.00014868413367
Oropharyngeal cancer	selenium	Inverse variance weighted	7	0.0607842899698099	0.999572988681034	0.999126829024066	1.00001934757041
Oropharyngeal cancer	selenium	Simple mode	7	0.189421053953504	0.999284646579935	0.998337940745612	1.0002322501583
Oropharyngeal cancer	selenium	Weighted mode	7	0.253885992829426	0.999519336468536	0.998773104599887	1.00026612588324
Mouth ulcers	selenium	MR Egger	6	0.0833526562635383	1.01598737851399	1.00232072813456	1.02984037377022
Mouth ulcers	selenium	Weighted median	6	0.00436482589746045	1.00662774941094	1.00206584400568	1.01121042289352
Mouth ulcers	selenium	Inverse variance weighted	6	0.00321660693421139	1.00546665731393	1.00182662282695	1.00911991749362
Mouth ulcers	selenium	Simple mode	6	0.0983057402167757	1.00652411100832	1.00021945265864	1.01286850935386
Mouth ulcers	selenium	Weighted mode	6	0.0382142887445147	1.00688149683231	1.00205105210713	1.01173522699409
Toothache	selenium	MR Egger	7	0.281356725446632	1.00522381990737	0.996755949211323	1.01376362880873
Toothache	selenium	Weighted median	7	0.625277343182826	0.999315323718672	0.99657227329965	1.00206592434334
Toothache	selenium	Inverse variance weighted	7	0.118970204992675	0.998260198844566	0.996077341651733	1.00044783966747
Toothache	selenium	Simple mode	7	0.746354908242951	0.999338274530135	0.995517876016771	1.00317333420143
Toothache	selenium	Weighted mode	7	0.767191304727768	0.999494979997847	0.996305786175902	1.00269438249004
Loose teeth	selenium	MR Egger	7	0.699389964728655	1.00205189257623	0.992259718427462	1.01194070137898
Loose teeth	selenium	Weighted median	7	0.0918669838631131	0.997551518724899	0.99471203624675	1.0003991067255
Loose teeth	selenium	Inverse variance weighted	7	0.0887702628640623	0.998101151180147	0.995918827472301	1.00028825694114
Loose teeth	selenium	Simple mode	7	0.179514755729982	0.997442639751506	0.994152942043687	1.00074322322001
Loose teeth	selenium	Weighted mode	7	0.146418318650988	0.997481277899159	0.994529226328276	1.00044209201643
Bleeding gums	selenium	MR Egger	7	0.633720553742623	1.00379328155459	0.989207994239892	1.01859362031175
Bleeding gums	selenium	Weighted median	7	0.36516072075854	1.0022259017875	0.997414454966548	1.00706055863954
Bleeding gums	selenium	Inverse variance weighted	7	0.23943066713725	1.0022276118107	0.998518970637389	1.00595002740368
Bleeding gums	selenium	Simple mode	7	0.437424876097846	1.00272698886176	0.996312287583316	1.00918299083778
Bleeding gums	selenium	Weighted mode	7	0.423311965092594	1.00239746981111	0.996935656015462	1.00788920671138
Painful gums	selenium	MR Egger	7	0.996714417968346	0.999984251346899	0.992877059175511	1.00714231807531
Painful gums	selenium	Weighted median	7	0.831521495144424	0.99975460702429	0.99749671469412	1.0020176102262
Painful gums	selenium	Inverse variance weighted	7	0.904919964135348	0.999887522065936	0.998043707673215	1.00173474277392
Painful gums	selenium	Simple mode	7	0.912253285125474	0.999813771924646	0.996643091053111	1.00299453987478
Painful gums	selenium	Weighted mode	7	0.806562896588464	0.999633256444377	0.996828920256875	1.00244548195099
Dental caries	VitaminB6	Inverse variance weighted	2	0.622901361530531	1.00059531100293	0.998225	1.00297164030385
Chronic periodontitis	VitaminB6	Inverse variance weighted	2	0.277341950951436	0.827724811629186	0.588477430670206	1.16423898025501
Acute periodontitis	VitaminB6	Inverse variance weighted	2	0.256733028364295	1.75710175788493	0.663354768540201	4.65423139168285
Diseases of pulp and periapical tissues	VitaminB6	Inverse variance weighted	2	0.996466330280834	1.00058485908542	0.77246169189221	1.29607729514526
Impacted teeth	VitaminB6	Inverse variance weighted	2	0.322129439679541	0.999212265697717	0.997654684520167	1.00077227863764
Cleft lip and cleft palate	VitaminB6	Inverse variance weighted	2	0.913151538437927	1.07993267040772	0.271158324136884	4.30100966410019
Oral cavity cancer	VitaminB6	Inverse variance weighted	2	0.857803261919986	1.00008397150189	0.999165768871901	1.00100301793188
Oropharyngeal cancer	VitaminB6	Inverse variance weighted	2	0.282178037666707	1.00059257293884	0.999512865382978	1.00167344683127
Mouth ulcers	VitaminB6	Inverse variance weighted	2	0.000202286666052016	0.984831462325116	0.976924045186573	0.992802883667579
Toothache	VitaminB6	Inverse variance weighted	2	0.0745793054886168	0.995195288597898	0.989940367879445	1.00047810411957
Loose teeth	VitaminB6	Inverse variance weighted	2	0.0151277312836609	0.993460591815914	0.988215684983152	0.998733335737383
Bleeding gums	VitaminB6	Inverse variance weighted	2	0.128466241885569	1.00697768092597	0.997990231583006	1.01604606717907
Painful gums	VitaminB6	Inverse variance weighted	2	0.602815096645287	0.998815623400989	0.994367072375434	1.00328407613767
Dental caries	zinc	MR Egger	3	0.442197780046016	0.996699937190298	0.991334714570843	1.00209419703939
Dental caries	zinc	Weighted median	3	0.877611207894349	0.999899379712642	0.998619626442877	1.0011807730147
Dental caries	zinc	Inverse variance weighted	3	0.631109449089482	0.9997470339408	0.998715109586943	1.00078002453253
Dental caries	zinc	Simple mode	3	0.848877760467881	1.00019503744082	0.998428298102738	1.00196490306036
Dental caries	zinc	Weighted mode	3	0.835640879645987	1.00022809988224	0.998332427456499	1.00212737188449
Chronic periodontitis	zinc	MR Egger	3	0.628010961011025	0.776341245819328	0.36661757572925	1.64396300085026
Chronic periodontitis	zinc	Weighted median	3	0.641641407323815	0.961152884767203	0.813438928727321	1.1356905051762
Chronic periodontitis	zinc	Inverse variance weighted	3	0.556070858704303	0.956821298973491	0.826053637737082	1.10829001452894
Chronic periodontitis	zinc	Simple mode	3	0.925022014438559	0.988497321682217	0.798659354036276	1.22345897538757
Chronic periodontitis	zinc	Weighted mode	3	0.531599347705709	0.923700120423168	0.750623732289222	1.13668390135715
Acute periodontitis	zinc	MR Egger	3	0.694322338141791	0.35777082166638	0.00747581329955481	17.1218776749627
Acute periodontitis	zinc	Weighted median	3	0.133876640490952	0.667048691330761	0.392857448384977	1.13260919052259
Acute periodontitis	zinc	Inverse variance weighted	3	0.398687608919569	0.834326799462773	0.547835487777265	1.27063913133136
Acute periodontitis	zinc	Simple mode	3	0.358321669492196	0.643092183470678	0.309505560583257	1.33622011721445
Acute periodontitis	zinc	Weighted mode	3	0.306275229537841	0.627714545344519	0.321189839284551	1.22676841619513
Diseases of pulp and periapical tissues	zinc	MR Egger	3	0.48515150397691	1.35459776537455	0.76778721978555	2.38990055925943
Diseases of pulp and periapical tissues	zinc	Weighted median	3	0.72820735095365	0.976804800538246	0.855702112546984	1.11504646811559
Diseases of pulp and periapical tissues	zinc	Inverse variance weighted	3	0.751381580196521	0.98212641224434	0.878437451904337	1.09805460540972
Diseases of pulp and periapical tissues	zinc	Simple mode	3	0.546319342463236	0.931501048166639	0.767871834413558	1.1299987365707
Diseases of pulp and periapical tissues	zinc	Weighted mode	3	0.735686861439068	1.03867467620355	0.857317877512327	1.25839564446857
Impacted teeth	zinc	Wald ratio	1	0.917401858964755	1.00007167110758	0.998717998870952	1.00142717812492
Cleft lip and cleft palate	zinc	MR Egger	3	0.808982738116505	1.61393158771173	0.0777900355651883	33.4846892778561
Cleft lip and cleft palate	zinc	Weighted median	3	0.604925370652748	1.20302024353161	0.597233977708783	2.42326753059009
Cleft lip and cleft palate	zinc	Inverse variance weighted	3	0.52048051075365	1.21824899191999	0.667165722622416	2.22453066155803
Cleft lip and cleft palate	zinc	Simple mode	3	0.83703980707568	1.10561122589018	0.476138468221183	2.56727037279953
Cleft lip and cleft palate	zinc	Weighted mode	3	0.759980783425915	1.17041113480469	0.484474172941009	2.82752373807466
Oral cavity cancer	zinc	MR Egger	3	0.614456666598737	0.999268219396816	0.997199658746072	1.00134107100688
Oral cavity cancer	zinc	Weighted median	3	0.671633014004345	0.999899350840693	0.999434116412327	1.00036480183468
Oral cavity cancer	zinc	Inverse variance weighted	3	0.506310721881047	0.999865704283736	0.999469748064025	1.00026181736795
Oral cavity cancer	zinc	Simple mode	3	0.918955953459793	0.999967720256933	0.999417682391477	1.00051806084032
Oral cavity cancer	zinc	Weighted mode	3	0.909378664721146	0.999963451783754	0.999406961779187	1.00052025165321
Oropharyngeal cancer	zinc	MR Egger	3	0.586682453892917	0.999057178594983	0.996626604952262	1.00149367992236
Oropharyngeal cancer	zinc	Weighted median	3	0.0634357289063263	0.999498934449632	0.998970100146682	1.00002804870663
Oropharyngeal cancer	zinc	Inverse variance weighted	3	0.048535583187686	0.999531514290677	0.999066249938186	0.999996995316404
Oropharyngeal cancer	zinc	Simple mode	3	0.263957583084438	0.999481031054593	0.998819926055467	1.00014257362991
Oropharyngeal cancer	zinc	Weighted mode	3	0.244234802887601	0.999475685708353	0.998846422652485	1.00010534519353
Mouth ulcers	zinc	Inverse variance weighted	2	0.371019504377157	1.00196252084221	0.997667636193555	1.00627589464845
Toothache	zinc	Inverse variance weighted	2	0.39795766996115	0.998784439938881	0.995971513527395	1.00160531090992
Loose teeth	zinc	Inverse variance weighted	2	0.66183898795456	1.00062948166431	0.997811688894722	1.00345523180319
Bleeding gums	zinc	Inverse variance weighted	2	0.728352627798421	0.999153955762539	0.994392918362626	1.00393778845464
Painful gums	zinc	Inverse variance weighted	2	0.495813021034251	1.0008266612504	0.998449597790076	1.00320938391547

## Sheet: Supplementary Table S4
Supplementary Table S4. Reverse MR analysis results for the association between our exposures and outcomes.
Exposuer	Outcome	method	nsnp	pval	or	or_lci95	or_uci95
Reverse MR analysis
Dental caries	VitaminA	MR Egger	14	0.148303222003629	2.95462628435803e-06	2.85533223955513e-13	30.5737327491511
Dental caries	VitaminA	Weighted median	14	0.565456767736057	0.0279869475854724	1.4152926108857e-07	5534.32717112686
Dental caries	VitaminA	Inverse variance weighted	14	0.405895733629995	0.0214776767126889	2.50298619274368e-06	184.296101317734
Dental caries	VitaminA	Simple mode	14	0.812090378987168	0.0495978291757075	1.43388946921983e-12	1715574813.64383
Dental caries	VitaminA	Weighted mode	14	0.769110666057417	0.0404310011537347	3.13450398972583e-11	52150702.619979
Chronic periodontitis	VitaminA	MR Egger	12	0.932216675957402	1.00759552323057	0.850041890146881	1.19435141985633
Chronic periodontitis	VitaminA	Weighted median	12	0.747343249778538	1.01526338086569	0.925874845917407	1.1132819268953
Chronic periodontitis	VitaminA	Inverse variance weighted	12	0.887298107158448	1.0046025717841	0.942787676876735	1.07047042721071
Chronic periodontitis	VitaminA	Simple mode	12	0.938560277662696	1.00668913362941	0.852968698114747	1.18811278070042
Chronic periodontitis	VitaminA	Weighted mode	12	0.815743547267415	1.01914826488525	0.872153436853257	1.19092
Acute periodontitis	VitaminA	MR Egger	8	0.335168762820141	1.0159485922477	0.986314387858556	1.04647316798353
Acute periodontitis	VitaminA	Weighted median	8	0.270750643295403	1.01407855969348	0.989159283736508	1.03962561150458
Acute periodontitis	VitaminA	Inverse variance weighted	8	0.28202262088188	1.00974283882876	0.992062570185508	1.0277382003993
Acute periodontitis	VitaminA	Simple mode	8	0.917687724948349	0.997192484230548	0.947198831783451	1.04982482794408
Acute periodontitis	VitaminA	Weighted mode	8	0.238970499800009	1.01655868772372	0.991451397657122	1.04230178910288
Diseases of pulp and periapical tissues	VitaminA	MR Egger	12	0.677953710252994	1.04576374225748	0.851864087192066	1.28379846158933
Diseases of pulp and periapical tissues	VitaminA	Weighted median	12	0.740474667384907	1.01898494452335	0.911665602957292	1.13893769140469
Diseases of pulp and periapical tissues	VitaminA	Inverse variance weighted	12	0.635051368813178	1.02098873148342	0.937062538227556	1.11243161186215
Diseases of pulp and periapical tissues	VitaminA	Simple mode	12	0.528980353344804	1.06111702767038	0.887334159019491	1.26893497220509
Diseases of pulp and periapical tissues	VitaminA	Weighted mode	12	0.659860480656423	1.03658830351044	0.887102816982537	1.21126355412735
Impacted teeth	VitaminA	Wald ratio	1	0.642716957838596	298883.016647457	2.19488825687257e-18	4.0699592501155e+28
Cleft lip and cleft palate	VitaminA	MR Egger	12	0.258094718640367	1.01652460736638	0.989655884872084	1.04412280387231
Cleft lip and cleft palate	VitaminA	Weighted median	12	0.278436275684062	1.00955850047364	0.992339222493093	1.02707657097135
Cleft lip and cleft palate	VitaminA	Inverse variance weighted	12	0.391977097302964	1.00566566371088	0.992740547395857	1.01875906028019
Cleft lip and cleft palate	VitaminA	Simple mode	12	0.546636476866786	1.00890215224551	0.981114369093209	1.0374769597416
Cleft lip and cleft palate	VitaminA	Weighted mode	12	0.214932712106332	1.01427726767035	0.993086978345621	1.03591971110793
Oral cavity cancer	VitaminA	MR Egger	8	0.658297063083748	2.59887079654128e-11	6.33846028591675e-56	1.0655788807452e+34
Oral cavity cancer	VitaminA	Weighted median	8	0.958493029099864	0.336719430551552	5.29954879503244e-19	213942694550219584
Oral cavity cancer	VitaminA	Inverse variance weighted	8	0.53578092345387	5.86774244346574e-05	2.36710522692178e-18	1454536156.2833
Oral cavity cancer	VitaminA	Simple mode	8	0.846478823589726	0.00358789731895655	5.02686978684932e-27	2.56083959147945e+21
Oral cavity cancer	VitaminA	Weighted mode	8	0.82106702950191	0.0021944326886962	1.41294600977084e-25	34081520397226065920
Oropharyngeal cancer	VitaminA	MR Egger	9	0.589881584864989	848630543292944	1.30826589586456e-37	5.50479685579319e+66
Oropharyngeal cancer	VitaminA	Weighted median	9	0.447843442310319	1.49104158047232e-06	1.34193376300461e-21	1656717385.00683
Oropharyngeal cancer	VitaminA	Inverse variance weighted	9	0.673020300912823	193.321844986209	4.65262413592245e-09	8032743384602.23
Oropharyngeal cancer	VitaminA	Simple mode	9	0.517034529690236	7.03704958861867e-11	3.07491764139574e-40	1.6104518132785e+19
Oropharyngeal cancer	VitaminA	Weighted mode	9	0.394941926751221	9.53507334903069e-12	8.91464319937575e-36	10198683417611.4
Mouth ulcers	VitaminA	MR Egger	83	0.674088590721134	1.31724869591921	0.366406658346509	4.73556931178889
Mouth ulcers	VitaminA	Weighted median	83	0.23021509966848	2.02112720789418	0.640289255423288	6.37985903385121
Mouth ulcers	VitaminA	Inverse variance weighted	83	0.725206661352697	0.881278044344851	0.435576875372253	1.78303999903701
Mouth ulcers	VitaminA	Simple mode	83	0.444415661685161	0.384891792431353	0.0337081880601548	4.39482809389369
Mouth ulcers	VitaminA	Weighted mode	83	0.505561828614695	1.46259344594272	0.4798881172371	4.45766317455548
Toothache	VitaminA	MR Egger	13	0.908650888524145	0.454006568514623	8.55504185293391e-07	240936.24297552
Toothache	VitaminA	Weighted median	13	0.131787560129742	0.0157508266648148	7.12625417770497e-05	3.48133162863043
Toothache	VitaminA	Inverse variance weighted	13	0.160226200031075	0.0475156446728228	0.000676230592552396	3.33870799922294
Toothache	VitaminA	Simple mode	13	0.283825886410265	0.00663464579022573	1.03914470203091e-06	42.3603418039181
Toothache	VitaminA	Weighted mode	13	0.275458746738833	0.00644899459171198	1.12767061900082e-06	36.8809212044391
Loose teeth	VitaminA	MR Egger	15	0.610903907631721	0.00263158020753517	5.26275385331168e-13	13158917.5205924
Loose teeth	VitaminA	Weighted median	15	0.802363016265032	2.01971334845683	0.00821471156308522	496.577631315229
Loose teeth	VitaminA	Inverse variance weighted	15	0.675729967943053	0.44459566746956	0.00996432678468395	19.8372967691639
Loose teeth	VitaminA	Simple mode	15	0.619752618243599	9.13876945815192	0.00177565612451371	47034.5051929032
Loose teeth	VitaminA	Weighted mode	15	0.658628849379403	6.53069055072537	0.00188890972370147	22579.1198669662
Bleeding gums	VitaminA	MR Egger	38	0.889526912190343	1.36647257801939	0.0172064212086942	108.52037642409
Bleeding gums	VitaminA	Weighted median	38	0.0460497733491737	8.32416967606849	1.03780960679664	66.7673534164502
Bleeding gums	VitaminA	Inverse variance weighted	38	0.145321801094597	2.84718117851616	0.69632196442503	11.6417994511926
Bleeding gums	VitaminA	Simple mode	38	0.131331456478066	38.7696677473881	0.372185207824797	4038.54614756863
Bleeding gums	VitaminA	Weighted mode	38	0.175592233199028	33.8810787135209	0.228244907733608	5029.36738519303
Painful gums	VitaminA	MR Egger	9	0.89745915529057	5.07190476955508	2.3005454212339e-10	111817909587.886
Painful gums	VitaminA	Weighted median	9	0.110929903939587	0.00237783858110282	1.41241604927096e-06	4.00315213120069
Painful gums	VitaminA	Inverse variance weighted	9	0.328074475749985	0.0523922989523712	0.00014208995996092	19.3184162362323
Painful gums	VitaminA	Simple mode	9	0.278935820747247	0.000734971604173356	3.78430112252004e-09	142.743201836285
Painful gums	VitaminA	Weighted mode	9	0.274512244249385	0.000734971604173356	4.26886038994946e-09	126.540390079975
Dental caries	VitaminB9	MR Egger	9	0.857981874111349	32.9720111773341	3.09452203363412e-15	351315488874229888
Dental caries	VitaminB9	Weighted median	9	0.914328953072804	3.05739475960614	4.39261303574617e-09	2128041473.26381
Dental caries	VitaminB9	Inverse variance weighted	9	0.52000393354834	0.00975201546700529	7.28889920418984e-09	13047.4853615816
Dental caries	VitaminB9	Simple mode	9	0.496761468122758	31962.604505458	1.26592436345289e-08	80700562866633200
Dental caries	VitaminB9	Weighted mode	9	0.49595795137798	43227.6411868876	7.88951572354448e-09	236849640467258752
Chronic periodontitis	VitaminB9	MR Egger	7	0.770180743927465	0.959917267173839	0.740183346821175	1.24488231703098
Chronic periodontitis	VitaminB9	Weighted median	7	0.489705428479685	0.952215021841344	0.828701572652634	1.09413747691822
Chronic periodontitis	VitaminB9	Inverse variance weighted	7	0.361153535502487	0.953086509854643	0.859691325207252	1.05662796474993
Chronic periodontitis	VitaminB9	Simple mode	7	0.222035917846133	0.843131810249888	0.659591019262626	1.07774549485218
Chronic periodontitis	VitaminB9	Weighted mode	7	0.627304285622829	0.949346268051413	0.777877281179203	1.15861249385881
Acute periodontitis	VitaminB9	Wald ratio	1	0.134179995438312	1.08173403163709	0.97604871821102	1.19886281634238
Diseases of pulp and periapical tissues	VitaminB9	MR Egger	7	0.398420510675209	0.823403990028189	0.544993931380438	1.24403978054769
Diseases of pulp and periapical tissues	VitaminB9	Weighted median	7	0.849795364529621	1.01748786307962	0.850363746831178	1.21745730032851
Diseases of pulp and periapical tissues	VitaminB9	Inverse variance weighted	7	0.335463177586904	1.06786022279588	0.934305658672621	1.22050577864394
Diseases of pulp and periapical tissues	VitaminB9	Simple mode	7	0.979534500328006	0.996480650938175	0.769552666582014	1.29033
Diseases of pulp and periapical tissues	VitaminB9	Weighted mode	7	0.774137793379063	0.964926387269797	0.76430109438152	1.21821483665804
Impacted teeth	VitaminB9	Wald ratio	1	0.832030865330245	0.00100778507227374	2.04837501752381e-31	4.95822660991809e+24
Cleft lip and cleft palate	VitaminB9	MR Egger	9	0.915309678353591	0.997590120751897	0.955702163449973	1.04131400668727
Cleft lip and cleft palate	VitaminB9	Weighted median	9	0.461600870106945	1.01034251380082	0.983041666938284	1.0384015546082
Cleft lip and cleft palate	VitaminB9	Inverse variance weighted	9	0.138580352951015	1.01496195170167	0.995209515676701	1.03510642450158
Cleft lip and cleft palate	VitaminB9	Simple mode	9	0.0704174214984727	1.05359468199174	1.00316654583253	1.10655778796934
Cleft lip and cleft palate	VitaminB9	Weighted mode	9	0.811960757617262	0.99633595351213	0.967605271400084	1.02591972326127
Oral cavity cancer	VitaminB9	MR Egger	7	0.419580003790171	7.50598994502067e-20	1.72341669354422e-62	3.26908084770188e+23
Oral cavity cancer	VitaminB9	Weighted median	7	0.487130825270432	164092059.390836	1.10494540375016e-15	2.43688094124277e+31
Oral cavity cancer	VitaminB9	Inverse variance weighted	7	0.883432522874978	20.5495484405242	5.79858064625832e-17	7282539760517784576
Oral cavity cancer	VitaminB9	Simple mode	7	0.652715687173305	217272315.708322	6.51083286045245e-27	7.25057149907796e+42
Oral cavity cancer	VitaminB9	Weighted mode	7	0.639023843187889	217272315.708322	1.7511743404021e-25	2.69574868042078e+41
Oropharyngeal cancer	VitaminB9	Inverse variance weighted	2	0.304968878606553	5.92500639455157e-15	3.88566679019884e-42	9034665778349.02
Mouth ulcers	VitaminB9	MR Egger	58	0.307784336459983	0.400923935827786	0.0703360417602247	2.28531487267373
Mouth ulcers	VitaminB9	Weighted median	58	0.174282951845116	0.338533631563859	0.0709514636257784	1.61525941599006
Mouth ulcers	VitaminB9	Inverse variance weighted	58	0.225618610163722	0.551179175387432	0.210293389881793	1.44464114422016
Mouth ulcers	VitaminB9	Simple mode	58	0.31451241343819	0.194610742013682	0.00824493606841825	4.59352754137021
Mouth ulcers	VitaminB9	Weighted mode	58	0.0783743445655851	0.291797683838744	0.0758839000028438	1.12205472162692
Toothache	VitaminB9	MR Egger	8	0.794792272306199	0.0866317132356136	1.90843161540571e-09	3932576.71773692
Toothache	VitaminB9	Weighted median	8	0.40729694617887	0.0312054454995129	8.56418837265291e-06	113.703691050577
Toothache	VitaminB9	Inverse variance weighted	8	0.924491275749342	0.726779843621818	0.000989061250476946	534.050788907402
Toothache	VitaminB9	Simple mode	8	0.51741836181835	0.0099031769133066	1.70683361138631e-08	5745.9
Toothache	VitaminB9	Weighted mode	8	0.531419450311822	0.010773160526681	1.49108807914895e-08	7783.64399505365
Loose teeth	VitaminB9	MR Egger	9	0.899087755671454	0.114960544235412	1.14007133397394e-15	11592192819054.1
Loose teeth	VitaminB9	Weighted median	9	0.902337262491447	1.6763998696392	0.000436978891365147	6431.24090993676
Loose teeth	VitaminB9	Inverse variance weighted	9	0.750097270747839	2.60250667522988	0.00723141761089447	936.613173108984
Loose teeth	VitaminB9	Simple mode	9	0.74612714654095	0.115436007602279	3.79210015896281e-07	35140.0841026257
Loose teeth	VitaminB9	Weighted mode	9	0.72880779695973	0.10029004046262	3.5494046908327e-07	28337.4061063585
Bleeding gums	VitaminB9	MR Egger	21	0.12613034387184	96.7654291007421	0.357249943948897	26210.0762439593
Bleeding gums	VitaminB9	Weighted median	21	0.694092428622393	1.91179404723199	0.0756682022188498	48.302409358963
Bleeding gums	VitaminB9	Inverse variance weighted	21	0.726665109700483	1.51756487883738	0.14637283883296	15.733814960772
Bleeding gums	VitaminB9	Simple mode	21	0.353563201124175	27.4220270695078	0.0295373880724469	25458.1605779244
Bleeding gums	VitaminB9	Weighted mode	21	0.401221228956978	16.5670756528691	0.0271044166618853	10126.3199688725
Painful gums	VitaminB9	MR Egger	5	0.134223359254778	4.23692596243847e-18	8.39822156163133e-35	0.213754084474261
Painful gums	VitaminB9	Weighted median	5	0.383612932624768	0.00222711642349121	2.40533276348356e-09	2062.10452004188
Painful gums	VitaminB9	Inverse variance weighted	5	0.394397071143006	0.0155601237007588	1.07444562315981e-06	225.34174309434
Painful gums	VitaminB9	Simple mode	5	0.578528998533634	0.00336604599201951	3.16425461511906e-11	358071
Painful gums	VitaminB9	Weighted mode	5	0.580600414029486	0.00298316593977852	1.70122490488981e-11	523110.083721179
Dental caries	VitaminB12	MR Egger	15	0.819903893186578	0.503022084351136	0.00152765853336763	165.63336100193
Dental caries	VitaminB12	Weighted median	15	0.552048618499163	3.5596091726126	0.0542101884720092	233.734982646117
Dental caries	VitaminB12	Inverse variance weighted	15	0.939807160515529	1.12616851132745	0.0515445894280762	24.6050173253428
Dental caries	VitaminB12	Simple mode	15	0.463485472627867	12.0637365427044	0.0185904548776479	7828.41196353749
Dental caries	VitaminB12	Weighted mode	15	0.531967746111679	9.13101876647786	0.0105403027003114	7910.16217317054
Chronic periodontitis	VitaminB12	MR Egger	11	0.599439529581801	1.01735687701265	0.956232847542585	1.08238805837387
Chronic periodontitis	VitaminB12	Weighted median	11	0.555793775462159	1.01029571738185	0.976445127489854	1.04531981145116
Chronic periodontitis	VitaminB12	Inverse variance weighted	11	0.246020263005644	1.01394532764282	0.990495841942164	1.03794996800071
Chronic periodontitis	VitaminB12	Simple mode	11	0.964141684842672	1.00137276536677	0.944633062931835	1.0615205570998
Chronic periodontitis	VitaminB12	Weighted mode	11	0.812524481882128	1.00597380685779	0.958887451022188	1.05537234740654
Acute periodontitis	VitaminB12	MR Egger	8	0.0176473472760907	0.986041955056747	0.977697523921408	0.994457604057805
Acute periodontitis	VitaminB12	Weighted median	8	0.018702840707145	0.989904763785114	0.981567849054517	0.998312487830923
Acute periodontitis	VitaminB12	Inverse variance weighted	8	0.101705680926071	0.994694517710232	0.988377829236261	1.00105157592146
Acute periodontitis	VitaminB12	Simple mode	8	0.524495704022967	0.993703661475525	0.975504094639862	1.01224276992339
Acute periodontitis	VitaminB12	Weighted mode	8	0.0529133303317307	0.989972738101282	0.981601906624974	0.998414953729486
Diseases of pulp and periapical tissues	VitaminB12	MR Egger	11	0.81763485456169	0.990210294096719	0.912973440725375	1.07398132606801
Diseases of pulp and periapical tissues	VitaminB12	Weighted median	11	0.620910582986006	0.989877204788013	0.95075712983094	1.03060692348756
Diseases of pulp and periapical tissues	VitaminB12	Inverse variance weighted	11	0.948601702348636	0.998944343607504	0.967373583727853	1.03154543230339
Diseases of pulp and periapical tissues	VitaminB12	Simple mode	11	0.559010181487434	0.981124195541202	0.922333348226873	1.04366245558281
Diseases of pulp and periapical tissues	VitaminB12	Weighted mode	11	0.642671038784583	0.986456029831974	0.932852328270366	1.04313991539916
Impacted teeth	VitaminB12	MR Egger	3	0.446480212069811	2.57425375592995e-74	3.93473763653455e-196	1.68417389215207e+48
Impacted teeth	VitaminB12	Weighted median	3	0.848545483257258	3.99225665781699	2.69666332529666e-06	5910308.88890466
Impacted teeth	VitaminB12	Inverse variance weighted	3	0.581287854618683	21.4573256678791	0.000397438330638361	1158461.04747348
Impacted teeth	VitaminB12	Simple mode	3	0.994607970446004	0.936636501392513	4.61857080748672e-08	18994792.3786016
Impacted teeth	VitaminB12	Weighted mode	3	0.9560563960904	0.621373499678338	1.91530484365246e-07	2015893.33093424
Cleft lip and cleft palate	VitaminB12	MR Egger	12	0.594268435175188	0.997312631179951	0.987797581395035	1.00691933554483
Cleft lip and cleft palate	VitaminB12	Weighted median	12	0.361867992631729	0.996996868899631	0.990571931025602	1.00346347949362
Cleft lip and cleft palate	VitaminB12	Inverse variance weighted	12	0.487115594827803	1.00163957020833	0.997021993550964	1.00627853256663
Cleft lip and cleft palate	VitaminB12	Simple mode	12	0.711504830787823	0.998088673429309	0.988276549179411	1.00799821755867
Cleft lip and cleft palate	VitaminB12	Weighted mode	12	0.487970093335186	0.997273081088338	0.989862697194443	1.0047389411504
Oral cavity cancer	VitaminB12	MR Egger	8	0.919477628656449	4.32593443269096	6.45699840207643e-12	2898205567144.54
Oral cavity cancer	VitaminB12	Weighted median	8	0.308987866098149	856.125438678919	0.00191768231373745	382206563.361736
Oral cavity cancer	VitaminB12	Inverse variance weighted	8	0.43560872766665	79.089690761844	0.00133727693289383	4677549.60168802
Oral cavity cancer	VitaminB12	Simple mode	8	0.567571922065069	613.547197529991	4.75400855337032e-07	791837371285.399
Oral cavity cancer	VitaminB12	Weighted mode	8	0.560671093327326	336.342922731563	2.61679865802262e-06	43230900216.4859
Oropharyngeal cancer	VitaminB12	MR Egger	12	0.405669260610602	2.30980022158114e-06	4.34738638722419e-19	12272148.3401958
Oropharyngeal cancer	VitaminB12	Weighted median	12	0.69671116204798	0.128329777959575	4.21101135290574e-06	3910.82581617595
Oropharyngeal cancer	VitaminB12	Inverse variance weighted	12	0.173573221648175	0.00507854003081252	2.51927645146727e-06	10.2376890116779
Oropharyngeal cancer	VitaminB12	Simple mode	12	0.78204184760137	0.0790959398473765	1.91004748652718e-09	3275399.0382274
Oropharyngeal cancer	VitaminB12	Weighted mode	12	0.803945143007948	0.108104570440825	3.86938694811408e-09	3020271.24888383
Mouth ulcers	VitaminB12	MR Egger	86	0.977075909658416	0.993015923707397	0.616536478638503	1.59938731754205
Mouth ulcers	VitaminB12	Weighted median	86	0.986943160923337	1.00355044386481	0.656435881776188	1.53421456891753
Mouth ulcers	VitaminB12	Inverse variance weighted	86	0.281438778462965	0.873621513532658	0.683201164271075	1.11711541024873
Mouth ulcers	VitaminB12	Simple mode	86	0.101054521090195	0.460752074447336	0.184321461748026	1.15175125074548
Mouth ulcers	VitaminB12	Weighted mode	86	0.830239541826587	0.954555846743844	0.624758080287789	1.45844750680637
Toothache	VitaminB12	MR Egger	13	0.642759851179028	3.10825586848997	0.0294020316375411	328.591393380676
Toothache	VitaminB12	Weighted median	13	0.413094355483841	2.36305507188948	0.301370686465993	18.5287737777799
Toothache	VitaminB12	Inverse variance weighted	13	0.433229871229911	1.82889358091276	0.404060957810089	8.27808692141937
Toothache	VitaminB12	Simple mode	13	0.643571272138805	2.27548192766092	0.0763006474425446	67.8607348254865
Toothache	VitaminB12	Weighted mode	13	0.668154840542218	2.22543604993226	0.0627844140601096	78.8820870032576
Loose teeth	VitaminB12	MR Egger	16	0.511430671198364	9.12249025529323	0.0146935816971787	5663.68569440757
Loose teeth	VitaminB12	Weighted median	16	0.780645495139688	1.29264842677227	0.212252244839069	7.87242536117224
Loose teeth	VitaminB12	Inverse variance weighted	16	0.569828851101589	1.46340115904404	0.39359361420413	5.44100024748059
Loose teeth	VitaminB12	Simple mode	16	0.867715458792224	1.31767155662572	0.0541908009342107	32.039724477376
Loose teeth	VitaminB12	Weighted mode	16	0.874384757631044	1.28007622693859	0.0631329798910095	25.9546618835695
Bleeding gums	VitaminB12	MR Egger	40	0.745518211237991	0.769691599916067	0.160235043101976	3.69722594703785
Bleeding gums	VitaminB12	Weighted median	40	0.629045474180223	0.840325797938068	0.414861913849502	1.70212647415115
Bleeding gums	VitaminB12	Inverse variance weighted	40	0.0220967932675768	0.567344438143779	0.349177126144371	0.92182358863792
Bleeding gums	VitaminB12	Simple mode	40	0.919003818055153	1.08963112575072	0.210558891898923	5.63878342774876
Bleeding gums	VitaminB12	Weighted mode	40	0.894494847903317	1.11808539039383	0.217126107631875	5.75755239131176
Painful gums	VitaminB12	MR Egger	9	0.944026929325555	0.727905354405924	0.000140292531996515	3776.72423066664
Painful gums	VitaminB12	Weighted median	9	0.878880385138451	1.22901263628751	0.0866355687384818	17.4347797578831
Painful gums	VitaminB12	Inverse variance weighted	9	0.972593013485658	1.03819089412504	0.122370124723554	8.80803492747181
Painful gums	VitaminB12	Simple mode	9	0.869599865859519	1.41576768645369	0.0254190426224068	78.8541949349248
Painful gums	VitaminB12	Weighted mode	9	0.866938064082201	1.41576768645369	0.027571800306501	72.6973980561519
Dental caries	VitaminC	MR Egger	13	0.707346993581484	0.198596439925866	5.33308413052684e-05	739.544792205103
Dental caries	VitaminC	Weighted median	13	0.944763327108095	1.2057391979675	0.00606257393969741	239.800294062535
Dental caries	VitaminC	Inverse variance weighted	13	0.822952777459923	1.5689	0.0303540733034929	81.0910818005828
Dental caries	VitaminC	Simple mode	13	0.802932478909332	3.38831334325877	0.000287527507902678	39928.9354811624
Dental caries	VitaminC	Weighted mode	13	0.941946886253609	1.38764686270884	0.000246717142299378	7804.74270105288
Chronic periodontitis	VitaminC	MR Egger	11	0.343389157362583	0.969587500781998	0.912641586086127	1.03008665833902
Chronic periodontitis	VitaminC	Weighted median	11	0.0576545585339901	0.964430753632493	0.92903269441841	1.00117755181308
Chronic periodontitis	VitaminC	Inverse variance weighted	11	0.0554888601390843	0.973043167318073	0.946205604319569	1.00064193357347
Chronic periodontitis	VitaminC	Simple mode	11	0.265051885155236	0.964227272676242	0.907645384277625	1.02433643081061
Chronic periodontitis	VitaminC	Weighted mode	11	0.202106579091635	0.959431143397451	0.904048468116035	1.01820660217389
Acute periodontitis	VitaminC	MR Egger	7	0.658846858481584	0.997408184755777	0.986647870782861	1.00828584997449
Acute periodontitis	VitaminC	Weighted median	7	0.79129846826416	0.998597232542723	0.988268417669111	1.00903399826733
Acute periodontitis	VitaminC	Inverse variance weighted	7	0.857881702622564	1.00073437476781	0.992725646353196	1.00880771290723
Acute periodontitis	VitaminC	Simple mode	7	0.858689356531152	1.00160297078095	0.984826003046409	1.01866574194218
Acute periodontitis	VitaminC	Weighted mode	7	0.682471148850152	0.997459710636878	0.985952139828216	1.00910159241315
Diseases of pulp and periapical tissues	VitaminC	MR Egger	11	0.756708058554613	0.977223024012665	0.848381228040451	1.12563174089341
Diseases of pulp and periapical tissues	VitaminC	Weighted median	11	0.750504727693264	1.0086100134227	0.956693673542606	1.06334366716311
Diseases of pulp and periapical tissues	VitaminC	Inverse variance weighted	11	0.491255298749116	1.01341046433374	0.975688701506071	1.05259061382575
Diseases of pulp and periapical tissues	VitaminC	Simple mode	11	0.897443080661727	1.00527888131368	0.929796075901251	1.08688953998405
Diseases of pulp and periapical tissues	VitaminC	Weighted mode	11	0.826875101317036	1.00796372579642	0.940527681474331	1.08023494952192
Impacted teeth	VitaminC	MR Egger	3	0.729339513151395	9.44380747748504e+32	1.68953804338576e-110	5.27869141632797e+175
Impacted teeth	VitaminC	Weighted median	3	0.365893597153893	0.000444683396148029	2.41042687215651e-11	8203.6640519541
Impacted teeth	VitaminC	Inverse variance weighted	3	0.23441116579632	0.00037524698032077	8.46476102044541e-10	166.348814691578
Impacted teeth	VitaminC	Simple mode	3	0.503205749420102	0.000586209147844707	8.77168826336337e-12	39176.1716444144
Impacted teeth	VitaminC	Weighted mode	3	0.505479894801849	0.000758510673024248	1.90481073299682e-11	30204.4938704499
Cleft lip and cleft palate	VitaminC	MR Egger	11	0.232405923603233	0.992602273067545	0.981384206768648	1.00394857152121
Cleft lip and cleft palate	VitaminC	Weighted median	11	0.293620027819942	0.99612978065096	0.988946856759732	1.0033648755919
Cleft lip and cleft palate	VitaminC	Inverse variance weighted	11	0.1925017399754	0.996378946092003	0.990957649094843	1.00182990173417
Cleft lip and cleft palate	VitaminC	Simple mode	11	0.391974602936207	0.995158664600579	0.984634580705174	1.00579523321266
Cleft lip and cleft palate	VitaminC	Weighted mode	11	0.366055845510503	0.995820157961396	0.987222803560265	1.00449238350857
Oral cavity cancer	VitaminC	MR Egger	8	0.604933669993836	9202.30489750344	5.33828895848119e-11	1586321311664421376
Oral cavity cancer	VitaminC	Weighted median	8	0.308960818396856	0.00014482266188593	5.818403655395e-12	3604.70064263745
Oral cavity cancer	VitaminC	Inverse variance weighted	8	0.0830518221465427	1.08913942151001e-05	2.6600501057947e-11	4.45940727546095
Oral cavity cancer	VitaminC	Simple mode	8	0.482445031359637	8.11993533692167e-05	1.25673102948144e-15	5246416.96027788
Oral cavity cancer	VitaminC	Weighted mode	8	0.494081506438906	0.000161243596628942	7.99113422138065e-15	3253542.83053766
Oropharyngeal cancer	VitaminC	MR Egger	12	0.635979898962068	4.20515556837051e-05	1.12730196962298e-22	15686421057271.5
Oropharyngeal cancer	VitaminC	Weighted median	12	0.162050867161783	0.000136847546025364	5.24847151099334e-10	35.6813422992548
Oropharyngeal cancer	VitaminC	Inverse variance weighted	12	0.358924633775882	0.0135636387071053	1.38777531973641e-06	132.566340069969
Oropharyngeal cancer	VitaminC	Simple mode	12	0.391791395165746	5.22560806317158e-05	2.01056454204634e-14	135817.473445001
Oropharyngeal cancer	VitaminC	Weighted mode	12	0.413818995743261	0.000110847042212886	8.25567266523764e-14	148831.806511451
Mouth ulcers	VitaminC	MR Egger	86	0.802524872945644	1.07642681515005	0.605478406652525	1.91368457676318
Mouth ulcers	VitaminC	Weighted median	86	0.946515737967099	1.01707818694407	0.620123504355077	1.66813228508933
Mouth ulcers	VitaminC	Inverse variance weighted	86	0.301790822861551	0.861889000253144	0.650025252863794	1.14280583021137
Mouth ulcers	VitaminC	Simple mode	86	0.486446077857634	1.36879165684876	0.56762193242501	3.30077203298748
Mouth ulcers	VitaminC	Weighted mode	86	0.858390667407015	1.04200205737422	0.66401053046055	1.63516727184888
Toothache	VitaminC	MR Egger	13	0.596595451510391	0.153868248721903	0.000183716276265239	128.869572397407
Toothache	VitaminC	Weighted median	13	0.172391125091631	0.168832197477628	0.0131160559358574	2.17323797981054
Toothache	VitaminC	Inverse variance weighted	13	0.101159363022754	0.232083915447739	0.0404734975871617	1.33082009266822
Toothache	VitaminC	Simple mode	13	0.207026379856922	0.0379834321735259	0.000310712152660859	4.6433366294996
Toothache	VitaminC	Weighted mode	13	0.242654145780556	0.0604282402572593	0.0006877875112923	5.30915749506418
Loose teeth	VitaminC	MR Egger	16	0.774112709497497	3.60427701679659	0.000671512155399417	19345.6108118864
Loose teeth	VitaminC	Weighted median	16	0.0577880476695271	8.15022711311242	0.933017448400329	71.1950265337496
Loose teeth	VitaminC	Inverse variance weighted	16	0.0534426172144465	4.41760951370251	0.978185905326118	19.9504753741557
Loose teeth	VitaminC	Simple mode	16	0.0966266695259623	39.3105973620396	0.678051158502241	2279.06559200324
Loose teeth	VitaminC	Weighted mode	16	0.128568359413242	29.4249380235927	0.477566494395481	1812.99774555638
Bleeding gums	VitaminC	MR Egger	38	0.678743153623573	0.63170816016166	0.0731427204402118	5.45584300410353
Bleeding gums	VitaminC	Weighted median	38	0.825708759899606	0.903024550692073	0.364247534855791	2.23873399575776
Bleeding gums	VitaminC	Inverse variance weighted	38	0.393527868122092	0.73294216451389	0.359018403251389	1.49631387042338
Bleeding gums	VitaminC	Simple mode	38	0.901063414297879	1.12664484825912	0.174138745443546	7.28917973352643
Bleeding gums	VitaminC	Weighted mode	38	0.736998374311499	1.35674583805946	0.231739485170642	7.94322671311804
Painful gums	VitaminC	MR Egger	9	0.539914539097495	23.0687085140303	0.00164659770901516	323190.849587411
Painful gums	VitaminC	Weighted median	9	0.782814164122013	0.633865003598309	0.024781052361299	16.2133890413047
Painful gums	VitaminC	Inverse variance weighted	9	0.642949698853983	0.55986194769082	0.0481917601192988	6.50412850031258
Painful gums	VitaminC	Simple mode	9	0.858965337162533	0.658041094865624	0.00753460097777687	57.4706057837869
Painful gums	VitaminC	Weighted mode	9	0.871166438364357	0.684269558969465	0.00806565759649431	58.0516620908601
Dental caries	VitaminD	MR Egger	15	0.180849084108783	0.0150106501678325	4.45361239345089e-05	5.05925524170863
Dental caries	VitaminD	Weighted median	15	0.147973215081489	0.0451737868000616	0.000680066661279537	3.00069262330537
Dental caries	VitaminD	Inverse variance weighted	15	0.0335052871348696	0.0347771710620534	0.00157206378114419	0.769340049421563
Dental caries	VitaminD	Simple mode	15	0.407393400188865	0.041848453651258	2.8768976021073e-05	60.8743624284259
Dental caries	VitaminD	Weighted mode	15	0.396405000794013	0.0466732541528463	4.86791043318573e-05	44.7500561712383
Chronic periodontitis	VitaminD	MR Egger	11	0.599111411262567	1.01631051092141	0.958846413432986	1.07721845765816
Chronic periodontitis	VitaminD	Weighted median	11	0.841588414665351	0.996675059696051	0.964648297688234	1.02976512476174
Chronic periodontitis	VitaminD	Inverse variance weighted	11	0.598462269943675	1.00633215154988	0.982965627187499	1.03025413222292
Chronic periodontitis	VitaminD	Simple mode	11	0.687885601969117	0.989562470869121	0.94156441073556	1.04000732460524
Chronic periodontitis	VitaminD	Weighted mode	11	0.888991218436002	0.996336729653278	0.947518861382119	1.04766978190617
Acute periodontitis	VitaminD	MR Egger	8	0.125178728946999	0.992275476584911	0.983844210523631	1.0007789962069
Acute periodontitis	VitaminD	Weighted median	8	0.324366970945549	0.995432458742284	0.986410486096995	1.00453694874881
Acute periodontitis	VitaminD	Inverse variance weighted	8	0.0193537024792403	0.992397673895232	0.986070764825329	0.998765178204145
Acute periodontitis	VitaminD	Simple mode	8	0.533026668360652	1.00570108511211	0.988752972203558	1.0229397038793
Acute periodontitis	VitaminD	Weighted mode	8	0.0909134121290674	0.990340299686313	0.980770507963491	1.00000346790534
Diseases of pulp and periapical tissues	VitaminD	MR Egger	11	0.866278281230243	0.992817998227242	0.915078396520881	1.07716189274222
Diseases of pulp and periapical tissues	VitaminD	Weighted median	11	0.27754277837229	0.976704316866507	0.936020220907484	1.01915674605918
Diseases of pulp and periapical tissues	VitaminD	Inverse variance weighted	11	0.185179877721212	0.978438409493785	0.947392471114778	1.01050171957377
Diseases of pulp and periapical tissues	VitaminD	Simple mode	11	0.26266582540482	0.960382	0.898369567824857	1.0266754281637
Diseases of pulp and periapical tissues	VitaminD	Weighted mode	11	0.253405839961832	0.961909745285363	0.90335336870352	1.02426181174581
Impacted teeth	VitaminD	MR Egger	3	0.329079861262023	1.68204860174709e-110	8.20469945014557e-233	3448374332089.8
Impacted teeth	VitaminD	Weighted median	3	0.484523542637853	227.708354259587	5.59378684661115e-05	926940836.707463
Impacted teeth	VitaminD	Inverse variance weighted	3	0.55645300260108	26.6543412033247	0.000472239967107414	1.50443e+06
Impacted teeth	VitaminD	Simple mode	3	0.456037198859088	14873.9649983822	1.78703575510091e-05	12379989272268.7
Impacted teeth	VitaminD	Weighted mode	3	0.493708341794135	7559.93142139315	5.28113138843828e-06	10822030147041.7
Cleft lip and cleft palate	VitaminD	MR Egger	12	0.944637655017704	0.999624002423644	0.989329717195959	1.01002540290978
Cleft lip and cleft palate	VitaminD	Weighted median	12	0.438188165992437	0.997379724050852	0.990785734043841	1.00401759913081
Cleft lip and cleft palate	VitaminD	Inverse variance weighted	12	0.897761268460355	1.0003	0.995674206050842	1.00495568658855
Cleft lip and cleft palate	VitaminD	Simple mode	12	0.552940593718557	0.996960259074331	0.987288088557155	1.00672718499633
Cleft lip and cleft palate	VitaminD	Weighted mode	12	0.377115602945469	0.996744650060501	0.989847493989551	1.00368986480933
Oral cavity cancer	VitaminD	MR Egger	8	0.394970576484158	2856616.75755245	4.39191044169843e-08	1.85802042365275e+20
Oral cavity cancer	VitaminD	Weighted median	8	0.92739660939077	2.00389686662076	6.4352249858984e-07	6240034.59218897
Oral cavity cancer	VitaminD	Inverse variance weighted	8	0.70459375941741	8.44819846319776	0.000136647564909223	522307.56780035
Oral cavity cancer	VitaminD	Simple mode	8	0.45283759243541	2.40324066309179e-05	9.76161731662821e-17	5916607.35859784
Oral cavity cancer	VitaminD	Weighted mode	8	0.428545935862634	1.23876134041866e-05	4.42908283572272e-17	3464666.87445787
Oropharyngeal cancer	VitaminD	MR Egger	12	0.69099715146801	0.00214933154142189	3.59304898579168e-16	12857119658.5931
Oropharyngeal cancer	VitaminD	Weighted median	12	0.996627635981851	0.978122449563742	3.43157528377576e-05	27880.0098270871
Oropharyngeal cancer	VitaminD	Inverse variance weighted	12	0.630640239475977	0.153489229301654	7.38365506817825e-05	319.068852676353
Oropharyngeal cancer	VitaminD	Simple mode	12	0.706214949934883	27.6869144012064	1.36686318938004e-06	560820742.716336
Oropharyngeal cancer	VitaminD	Weighted mode	12	0.778604954721866	11.6634464606549	6.45225882931003e-07	210834665.718316
Mouth ulcers	VitaminD	MR Egger	86	0.514450495168542	1.18577149525171	0.71196881475714	1.97488149734632
Mouth ulcers	VitaminD	Weighted median	86	0.426957763706341	1.18366826363039	0.780824872196731	1.79434673281358
Mouth ulcers	VitaminD	Inverse variance weighted	86	0.80503403915007	0.965530683075292	0.730805680024734	1.27564621545948
Mouth ulcers	VitaminD	Simple mode	86	0.219527435580663	0.570665292088025	0.234609000033637	1.38809199795072
Mouth ulcers	VitaminD	Weighted mode	86	0.492924843020747	1.15801134617239	0.762735923952537	1.75813179339308
Toothache	VitaminD	MR Egger	13	0.671827210245346	2.82661971450241	0.0262387607975744	304.50290972401
Toothache	VitaminD	Weighted median	13	0.760665158568488	1.36724608761794	0.182700449953895	10.2318405049266
Toothache	VitaminD	Inverse variance weighted	13	0.357673039938464	2.03693896466339	0.4472838162141	9.27625859769067
Toothache	VitaminD	Simple mode	13	0.907840195199216	0.824252951952457	0.0334612719904514	20.3038584126811
Toothache	VitaminD	Weighted mode	13	0.919225998931118	0.838387077882034	0.029826083117955	23.5663828059421
Loose teeth	VitaminD	MR Egger	16	0.73863498060767	3.06887449680107	0.00481611473873917	1955.51625906271
Loose teeth	VitaminD	Weighted median	16	0.354626800811019	0.436752311643288	0.0755892158804255	2.52354227390727
Loose teeth	VitaminD	Inverse variance weighted	16	0.935001286044625	1.05639521931167	0.282620093401247	3.94866071252819
Loose teeth	VitaminD	Simple mode	16	0.368501303316893	0.208108708575245	0.00753759323639268	5.74576436093054
Loose teeth	VitaminD	Weighted mode	16	0.325979089019775	0.208108708575245	0.0100578130808053	4.30602897835804
Bleeding gums	VitaminD	MR Egger	40	0.458417464299191	0.581570064644883	0.140824500047706	2.40173932786182
Bleeding gums	VitaminD	Weighted median	40	0.643342029991802	0.847497096854401	0.420677219416421	1.70736920381147
Bleeding gums	VitaminD	Inverse variance weighted	40	0.0972805379978888	0.662121816746891	0.40670873594348	1.07793430892305
Bleeding gums	VitaminD	Simple mode	40	0.961427142282244	0.963000307877655	0.211010121748344	4.39490572911219
Bleeding gums	VitaminD	Weighted mode	40	0.990454564699286	1.00894648753592	0.236704383875862	4.30060904678865
Painful gums	VitaminD	MR Egger	9	0.484360770838589	0.0393554499300369	7.32732079860606e-06	211.380323281369
Painful gums	VitaminD	Weighted median	9	0.768737718846145	1.49902714389907	0.100890780161684	22.2724254341686
Painful gums	VitaminD	Inverse variance weighted	9	0.899568684938073	1.14824811861806	0.134175249084829	9.82650489492549
Painful gums	VitaminD	Simple mode	9	0.674297035897057	2.46834509862746	0.042536528804108	143.235183904565
Painful gums	VitaminD	Weighted mode	9	0.685342317274289	2.36817084107535	0.0424928403930816	131.980660286307
Dental caries	VitaminE	MR Egger	15	0.659460448355182	0.262115456100594	0.000778039630405153	88.3046436735429
Dental caries	VitaminE	Weighted median	15	0.38600655500726	0.166549886921039	0.00289384093551696	9.58548360172935
Dental caries	VitaminE	Inverse variance weighted	15	0.679779953503376	0.520972482705403	0.0235567116688887	11.5216559743644
Dental caries	VitaminE	Simple mode	15	0.445533824698536	0.060408634232904	5.46684573711626e-05	66.7515284930962
Dental caries	VitaminE	Weighted mode	15	0.4420241284885	0.060408634232904	5.77549746553428e-05	63.1842211283387
Chronic periodontitis	VitaminE	MR Egger	11	0.459618664256805	1.01968536993708	0.970478344397423	1.07138738300165
Chronic periodontitis	VitaminE	Weighted median	11	0.302566198173165	1.01696702595134	0.984952508236761	1.05002213124343
Chronic periodontitis	VitaminE	Inverse variance weighted	11	0.495409416669706	1.00820415670534	0.984796424391411	1.0321682699306
Chronic periodontitis	VitaminE	Simple mode	11	0.365394949310295	1.02782060900973	0.971141346124172	1.08780787526068
Chronic periodontitis	VitaminE	Weighted mode	11	0.363220393901489	1.02541566447959	0.973810545124365	1.07975549271326
Acute periodontitis	VitaminE	MR Egger	8	0.177036739969518	0.993364350975834	0.984924736285948	1.00187628296418
Acute periodontitis	VitaminE	Weighted median	8	0.0507087207465344	0.991324667460017	0.98269802508217	1.00002703906171
Acute periodontitis	VitaminE	Inverse variance weighted	8	0.0193537024792403	0.992397673895232	0.986070764825329	0.998765178204145
Acute periodontitis	VitaminE	Simple mode	8	0.232510078446087	0.991392461700164	0.978623047322367	1.00432849584437
Acute periodontitis	VitaminE	Weighted mode	8	0.0707210197738867	0.990749606672297	0.982311203929053	0.999260498297447
Diseases of pulp and periapical tissues	VitaminE	MR Egger	11	0.854923615621917	1.00785770600626	0.928947354540918	1.0934711752941
Diseases of pulp and periapical tissues	VitaminE	Weighted median	11	0.503361753562188	0.985850552705954	0.945550686077177	1.02786802080677
Diseases of pulp and periapical tissues	VitaminE	Inverse variance weighted	11	0.689721124065197	1.00658865378566	0.97465350958729	1.0395701733625
Diseases of pulp and periapical tissues	VitaminE	Simple mode	11	0.567240795380645	0.978494698304569	0.910498184196612	1.0515692301517
Diseases of pulp and periapical tissues	VitaminE	Weighted mode	11	0.541914643037619	0.977280293662061	0.909994055150048	1.04954177115225
Impacted teeth	VitaminE	MR Egger	3	0.758783934569797	1.04788686010701e-47	5.54656239644158e-279	1.97972508573857e+184
Impacted teeth	VitaminE	Weighted median	3	0.915115866901773	2.38457965262493	2.73746641077698e-07	20771835.2171447
Impacted teeth	VitaminE	Inverse variance weighted	3	0.746204190019161	0.164254605337777	2.91560378156131e-06	9253.51227258363
Impacted teeth	VitaminE	Simple mode	3	0.73412741213445	61.467102257479	6.31627826779813e-08	59816944405.2768
Impacted teeth	VitaminE	Weighted mode	3	0.747705398442193	43.7484973744932	8.28462433335499e-08	23102206515.5121
Cleft lip and cleft palate	VitaminE	MR Egger	12	0.548569385165627	1.00305331836387	0.993446141077237	1.01275340240367
Cleft lip and cleft palate	VitaminE	Weighted median	12	0.251687707725517	1.00380414853926	0.99730815332617	1.01034245560317
Cleft lip and cleft palate	VitaminE	Inverse variance weighted	12	0.572494648829774	1.00133662110259	0.996702420095487	1.00599236898121
Cleft lip and cleft palate	VitaminE	Simple mode	12	0.290366976816718	1.00586189131207	0.995541177508503	1.01628959931721
Cleft lip and cleft palate	VitaminE	Weighted mode	12	0.312845534776351	1.00405668020861	0.996552645204986	1.01161722054751
Oral cavity cancer	VitaminE	MR Egger	8	0.587492497528737	2955.19687624896	3.96334570595946e-09	2203488977572651
Oral cavity cancer	VitaminE	Weighted median	8	0.829542610910516	4.70446999793564	3.54750674518874e-06	6238758.52850538
Oral cavity cancer	VitaminE	Inverse variance weighted	8	0.619812649403198	16.3163799360163	0.000264194184223642	1007684.00712059
Oral cavity cancer	VitaminE	Simple mode	8	0.795425741306196	0.0528114912952131	2.6814801965271e-11	104011717.723539
Oral cavity cancer	VitaminE	Weighted mode	8	0.753263822274171	0.024620471398416	5.59098642253468e-12	108418723.65081
Oropharyngeal cancer	VitaminE	MR Egger	12	0.589453629584561	6006.66058348728	3.11784237143947e-10	115720960417130032
Oropharyngeal cancer	VitaminE	Weighted median	12	0.919796685905239	0.59442704246548	2.38102732762536e-05	14839.9602438269
Oropharyngeal cancer	VitaminE	Inverse variance weighted	12	0.675617691835449	5.10819638408346	0.00245912467863912	10610.9586573722
Oropharyngeal cancer	VitaminE	Simple mode	12	0.351311659564497	0.000146382717066282	2.77869487543981e-12	7711.4979572255
Oropharyngeal cancer	VitaminE	Weighted mode	12	0.355046579018598	0.000204484786257592	6.62352367586164e-12	6312.95815597329
Mouth ulcers	VitaminE	MR Egger	86	0.0102045517282767	1.8326604027199	1.1664995948449	2.87925016565827
Mouth ulcers	VitaminE	Weighted median	86	0.166370748286112	1.37402583032084	0.876118656580518	2.15489873227619
Mouth ulcers	VitaminE	Inverse variance weighted	86	0.0312702085563146	1.31155236024526	1.02468247671385	1.67873427403724
Mouth ulcers	VitaminE	Simple mode	86	0.593038688933683	0.791790084364292	0.337424788327581	1.85799
Mouth ulcers	VitaminE	Weighted mode	86	0.261584546696922	1.30716751710624	0.821453772645647	2.08007677933543
Toothache	VitaminE	MR Egger	13	0.197735343656192	0.0379032436166633	0.000352004269371044	4.08135923814539
Toothache	VitaminE	Weighted median	13	0.687255145842404	0.652600197108017	0.0817043823249092	5.21253579241101
Toothache	VitaminE	Inverse variance weighted	13	0.814445163202306	0.834004887436156	0.183158804053961	3.79760151776527
Toothache	VitaminE	Simple mode	13	0.627956464883727	0.402395458408981	0.0111304767331525	14.5476342864887
Toothache	VitaminE	Weighted mode	13	0.674763383678876	0.441863969514275	0.0106842952001891	18.2739023863227
Loose teeth	VitaminE	MR Egger	16	0.828467458464566	2.51841846869314	0.000691390095879943	9173.44871043108
Loose teeth	VitaminE	Weighted median	16	0.443815689772842	0.454633705823239	0.060455595098023	3.41890285151341
Loose teeth	VitaminE	Inverse variance weighted	16	0.877895819772442	1.10887106226547	0.296700817668283	4.14422529197228
Loose teeth	VitaminE	Simple mode	16	0.260601374892889	0.126753296649685	0.00397270435680263	4.04419679104789
Loose teeth	VitaminE	Weighted mode	16	0.297250641841855	0.15712196730459	0.00546265106990959	4.51929151134182
Bleeding gums	VitaminE	MR Egger	40	0.0553373966490121	4.15755292650838	1.01228618294391	17.0754541827784
Bleeding gums	VitaminE	Weighted median	40	0.525053441831518	1.26009264802651	0.617702209035775	2.57054849146331
Bleeding gums	VitaminE	Inverse variance weighted	40	0.725375480181776	0.916368471970385	0.562910242891665	1.49176744787526
Bleeding gums	VitaminE	Simple mode	40	0.364953580156039	2.06662318820058	0.437695413465182	9.7577705194484
Bleeding gums	VitaminE	Weighted mode	40	0.354658666339197	1.97107137725156	0.476514519478305	8.15320880143135
Painful gums	VitaminE	MR Egger	9	0.423276278717045	0.0112129092815286	3.58324901294793e-07	350.880818222432
Painful gums	VitaminE	Weighted median	9	0.408147503345179	3.78815362845231	0.161364912055629	88.9295431698889
Painful gums	VitaminE	Inverse variance weighted	9	0.377431326654738	2.62917347188418	0.307300345905839	22.4944528613632
Painful gums	VitaminE	Simple mode	9	0.328331477424231	20.0761413437048	0.0707745387851493	5694.86510503389
Painful gums	VitaminE	Weighted mode	9	0.365104105108591	15.7645803005385	0.056591854497232	4391.47990925591
Dental caries	calcium	MR Egger	3	0.681269008626647	0.135820458938912	0.000106448756396218	173.296501442568
Dental caries	calcium	Weighted median	3	0.161459770078601	0.0636511393196491	0.00134694151347195	3.00790160238369
Dental caries	calcium	Inverse variance weighted	3	0.0983906490228781	0.0710833909236532	0.00309058970314054	1.6349140295363
Dental caries	calcium	Simple mode	3	0.299254609871994	0.0536940356205091	0.000866716223924841	3.32640532348741
Dental caries	calcium	Weighted mode	3	0.303389586173769	0.0536940356205091	0.000826105988173107	3.48993
Chronic periodontitis	calcium	Wald ratio	1	0.189097706098514	1.02312895411514	0.988802413942862	1.05864714930724
Acute periodontitis	calcium	Inverse variance weighted	2	0.96458205984892	1.00008488554778	0.996344908007772	1.0038389018327
Acute periodontitis	calcium	Wald ratio	1	0.718847133564018	4.91889490169272	0.000841459349714888	28754.2435200188
Impacted teeth	calcium	Inverse variance weighted	2	0.843344755971099	1.00084141397385	0.992527337035989	1.00922513521544
Cleft lip and cleft palate	calcium	Inverse variance weighted	2	0.707414479671383	7.16859649697773	0.000244514930301296	210166.208145895
Oral cavity cancer	calcium	MR Egger	3	0.256686802325018	1.84800456570684e-19	4.01874969908009e-35	0.000849796859867903
Oropharyngeal cancer	calcium	Weighted median	3	0.090537049124764	0.000217245166608061	1.2448979070791e-08	3.79111107394331
Oropharyngeal cancer	calcium	Inverse variance weighted	3	0.968477356396668	0.668819148574242	1.4489157711674e-09	308726747.54528
Oropharyngeal cancer	calcium	Simple mode	3	0.198788295316967	2.33295590891336e-05	3.74407981846016e-10	1.45367714814696
Oropharyngeal cancer	calcium	Weighted mode	3	0.204127587903233	3.40601213236245e-05	6.63215471338467e-10	1.7491930069707
Oropharyngeal cancer	calcium	MR Egger	14	0.546278581773689	1.11672325651958	0.78812535550387	1.58232548025867
Mouth ulcers	calcium	Weighted median	14	0.332977838437434	1.12554365148269	0.885887394340755	1.4300333422576
Mouth ulcers	calcium	Inverse variance weighted	14	0.0293129968654091	1.24656115800487	1.02242064246033	1.51983895484262
Mouth ulcers	calcium	Simple mode	14	0.550783365236301	1.24697052266369	0.61532834498813	2.52700122959907
Mouth ulcers	calcium	Weighted mode	14	0.357601570050755	1.12894853133077	0.879889377679274	1.44850570847381
Mouth ulcers	calcium	Inverse variance weighted	2	0.886774097855703	1.13296609488969	0.20319185296892	6.31724231761368
Toothache	calcium	MR Egger	3	0.522723555734458	12.3462990527526	0.0621831768679439	2451.32378205301
Loose teeth	calcium	Weighted median	3	0.166807212526593	3.13001850845552	0.620894255017862	15.7788798722131
Loose teeth	calcium	Inverse variance weighted	3	0.118727051326623	2.84155413434125	0.765163694244081	10.552552295844
Loose teeth	calcium	Simple mode	3	0.284703232207482	3.70727315097823	0.628855934515096	21.8553621928715
Loose teeth	calcium	Weighted mode	3	0.313885098852405	3.68555380667362	0.542026005621527	25.0602493625944
Loose teeth	calcium	MR Egger	4	0.770434649246106	0.43823556070689	0.00343872749610397	55.8492660106602
Bleeding gums	calcium	Weighted median	4	0.674455021119036	0.805284107423004	0.293149116390499	2.21212501559866
Bleeding gums	calcium	Inverse variance weighted	4	0.551168008332731	0.673697833148387	0.183809300833894	2.46924
Bleeding gums	calcium	Simple mode	4	0.922308205809293	0.92054173346631	0.199013363839909	4.25799085399524
Bleeding gums	calcium	Weighted mode	4	0.906011368204986	0.90699898732426	0.204222388596787	4.0281928375221
Bleeding gums	ironferritin	MR Egger	16	0.533282416694002	3.33002460349704	0.0830573810526282	133.510877893792
Bleeding gums	ironferritin	Weighted median	16	0.384697436169821	3.22810454771462	0.229823814629851	45.3419459065158
Bleeding gums	ironferritin	Inverse variance weighted	16	0.251445797906208	3.06737088883346	0.451715219269108	20.8289731412785
Bleeding gums	ironferritin	Simple mode	16	0.24119228620416	15.7702489257342	0.187889258746912	1323.65603461464
Bleeding gums	ironferritin	Weighted mode	16	0.373464745316347	7.05528838213447	0.108548346805961	458.570725577811
Bleeding gums	ironferritin	MR Egger	12	0.959679588376554	0.999064414761008	0.964323975415322	1.03505640250402
Chronic periodontitis	ironferritin	Weighted median	12	0.15499020288173	0.985462353688773	0.965772003315552	1.00555415481485
Chronic periodontitis	ironferritin	Inverse variance weighted	12	0.0900043195914736	0.98778598123623	0.973851328540369	1.00192002221659
Chronic periodontitis	ironferritin	Simple mode	12	0.237303889963885	0.980467817781584	0.950602271956258	1.01127166435977
Chronic periodontitis	ironferritin	Weighted mode	12	0.3064396416219	0.984703423670007	0.957352083811553	1.0128361853321
Acute periodontitis	ironferritin	MR Egger	8	0.465936424251919	1.00226211479444	0.996575572909626	1.00798110455325
Acute periodontitis	ironferritin	Weighted median	8	0.375697497241692	1.00245042695635	0.997036743479346	1.00789350550728
Acute periodontitis	ironferritin	Inverse variance weighted	8	0.834285026095283	1.00045222476227	0.996223507983309	1.00469889137422
Acute periodontitis	ironferritin	Simple mode	8	0.535529169775674	1.00288813975753	0.994224228597485	1.01162755034159
Acute periodontitis	ironferritin	Weighted mode	8	0.372507379224044	1.00280407246834	0.997043302859266	1.00859812695722
Diseases of pulp and periapical tissues	ironferritin	MR Egger	11	0.0600528734100065	1.06258496983455	1.00537470890446	1.1230507472668
Diseases of pulp and periapical tissues	ironferritin	Weighted median	11	0.118038979949063	1.02407507525558	0.993976729066494	1.05508482149743
Diseases of pulp and periapical tissues	ironferritin	Inverse variance weighted	11	0.00046148185308866	1.03599615704486	1.01569407059755	1.0567040494588
Diseases of pulp and periapical tissues	ironferritin	Simple mode	11	0.624384749239614	1.01494680954875	0.958173598938018	1.07508391731406
Diseases of pulp and periapical tissues	ironferritin	Weighted mode	11	0.72078818847328	1.01121552604985	0.952844034460889	1.07316287151111
Impacted teeth	ironferritin	MR Egger	3	0.431032442521079	3.20651817615283e-61	1.58086674951984e-156	6.50387442023271e+34
Impacted teeth	ironferritin	Weighted median	3	0.946799725983515	0.711118768320982	3.18361603222144e-05	15884.1360748361
Impacted teeth	ironferritin	Inverse variance weighted	3	0.234907818612645	0.0147585691205823	1.40538480791003e-05	15.4986279388434
Impacted teeth	ironferritin	Simple mode	3	0.917273115992261	2.08057597571164	1.01368615882147e-05	427035.167940066
Impacted teeth	ironferritin	Weighted mode	3	0.914538031923633	2.08057597571164	1.50350969001297e-05	287912.769665696
Cleft lip and cleft palate	ironferritin	MR Egger	12	0.670402634772319	1.00185893483807	0.99357507154579	1.01021186426637
Cleft lip and cleft palate	ironferritin	Weighted median	12	0.353472417151791	0.998105555864223	0.994115609334335	1.0021115162995
Cleft lip and cleft palate	ironferritin	Inverse variance weighted	12	0.68396060647296	0.999212086155428	0.995426993491488	1.00301157156396
Cleft lip and cleft palate	ironferritin	Simple mode	12	0.456624654640276	0.99749482193004	0.991159163252072	1.00387097922051
Cleft lip and cleft palate	ironferritin	Weighted mode	12	0.385998778464769	0.997597200647013	0.992400251779373	1.00282136462013
Oral cavity cancer	ironferritin	MR Egger	9	0.793947591123874	9.18345657222199	1.01660900617768e-06	82958024.2761954
Oral cavity cancer	ironferritin	Weighted median	9	0.798969978729671	0.358644202290401	0.000134088560779969	959.259038118731
Oral cavity cancer	ironferritin	Inverse variance weighted	9	0.37666555249768	0.0625713237920125	0.000134238393506563	29.1658031567061
Oral cavity cancer	ironferritin	Simple mode	9	0.995129688152552	0.966063285904875	2.0801824159312e-05	44865.213032557
Oral cavity cancer	ironferritin	Weighted mode	9	0.994997979054831	1.0386421604453	1.06293628555741e-05	101490.329393427
Oropharyngeal cancer	ironferritin	MR Egger	11	0.30625144983497	15823.5610253378	0.000408709370981976	612623789175.686
Oropharyngeal cancer	ironferritin	Weighted median	11	0.575805117147713	6.49901492374199	0.00923535769629547	4573.42274852695
Oropharyngeal cancer	ironferritin	Inverse variance weighted	11	0.305534062965467	13.9970995846305	0.0899115094800588	2179.01799130083
Oropharyngeal cancer	ironferritin	Simple mode	11	0.258668747930837	860.322792684815	0.013551596033282	54617574.6233296
Oropharyngeal cancer	ironferritin	Weighted mode	11	0.368101760108367	179.78271056353	0.00368389863858398	8773808.99654557
Mouth ulcers	ironferritin	MR Egger	11	0.30625144983497	15823.5610253378	0.000408709370981976	612623789175.686
Mouth ulcers	ironferritin	Weighted median	11	0.588542773530429	6.49901492374199	0.00737373601652498	5728.05900351805
Mouth ulcers	ironferritin	Inverse variance weighted	11	0.305534062965467	13.9970995846305	0.0899115094800588	2179.01799130083
Mouth ulcers	ironferritin	Simple mode	11	0.266005593511526	860.322792684815	0.0112865118980165	65578746.9415659
Mouth ulcers	ironferritin	Weighted mode	11	0.377649502662617	179.78271056353	0.00293569059037252	11009955.5871345
Toothache	ironferritin	MR Egger	13	0.454096270529351	2.98109099149937	0.188907713450196	47.0436243035764
Toothache	ironferritin	Weighted median	13	0.949041091325412	1.04038082630093	0.308989521170628	3.50300637909624
Toothache	ironferritin	Inverse variance weighted	13	0.485257476010487	1.39571184093342	0.547181181729495	3.56008504671998
Toothache	ironferritin	Simple mode	13	0.666078522206368	0.620554006032099	0.0749349001871829	5.13895759439942
Toothache	ironferritin	Weighted mode	13	0.714158140003852	0.66308423144232	0.0774686442674415	5.67559561865525
Loose teeth	ironferritin	MR Egger	16	0.361784849566653	0.140628470739938	0.00238194645370743	8.30260762238051
Loose teeth	ironferritin	Weighted median	16	0.576780925595003	0.721380635359713	0.22910988234801	2.27135562961674
Loose teeth	ironferritin	Inverse variance weighted	16	0.13779283843408	0.538299204658211	0.237567257055998	1.21972210028658
Loose teeth	ironferritin	Simple mode	16	0.950232406581411	0.936420374187156	0.12314965847088	7.12046730848352
Loose teeth	ironferritin	Weighted mode	16	0.900302453026157	0.883979026538418	0.132612681992561	5.89249012702755
Painful gums	ironferritin	MR Egger	8	0.254968695234518	80.5331768487332	0.0866076469584946	74884.7567289001
Painful gums	ironferritin	Weighted median	8	0.127340236459667	4.71585087483016	0.642221874679158	34.6286078853149
Painful gums	ironferritin	Inverse variance weighted	8	0.0232413705521201	4.84268652535798	1.23997518154317	18.9129694948392
Painful gums	ironferritin	Simple mode	8	0.358577029885195	4.88855929849896	0.206228717515919	115.881106679995
Painful gums	ironferritin	Weighted mode	8	0.356763752282775	3.62751909881641	0.280371266030075	46.9338209960013
Dental Calciumries	ironserum	MR Egger	16	0.108160861580439	46.9434481297687	0.578804449480541	3807.30888349257
Dental Calciumries	ironserum	Weighted median	16	0.158241385220401	9.58559168776064	0.415027277459188	221.391636152159
Dental Calciumries	ironserum	Inverse variance weighted	16	0.0269181631513716	12.1000316968536	1.32941332844936	110.131863380396
Dental Calciumries	ironserum	Simple mode	16	0.357855669281768	14.0628862036455	0.0596939611967647	3312.97780230742
Dental Calciumries	ironserum	Weighted mode	16	0.432647122493142	8.79046296339255	0.0446026555991778	1732.45826000102
Chronic periodontitis	ironserum	MR Egger	12	0.836491240457833	1.00390052327323	0.968384106784146	1.0407195384227
Chronic periodontitis	ironserum	Weighted median	12	0.436860462052641	1.0088213842555	0.986731361667194	1.03140593769274
Chronic periodontitis	ironserum	Inverse variance weighted	12	0.972567683075815	1.00028734306098	0.984040829448842	1.0168020866049
Chronic periodontitis	ironserum	Simple mode	12	0.625006875080679	1.00932047506308	0.973472293774646	1.04648876798684
Chronic periodontitis	ironserum	Weighted mode	12	0.547401307102273	1.00972238141906	0.979342609173055	1.04104455171155
Acute periodontitis	ironserum	MR Egger	8	0.193716616463746	1.0048035094262	0.998374692355325	1.01127372346881
Acute periodontitis	ironserum	Weighted median	8	0.410596459390205	1.00270014982986	0.996280407397224	1.00916125922364
Acute periodontitis	ironserum	Inverse variance weighted	8	0.619910347617682	1.00121439133299	0.996423952478242	1.00602786085091
Acute periodontitis	ironserum	Simple mode	8	0.169441232924158	0.991027889912472	0.979664734722147	1.00252284661744
Acute periodontitis	ironserum	Weighted mode	8	0.285663451664655	1.00374190311313	0.99740492653162	1.01011914144905
Diseases of pulp and periapiCalciuml tissues	ironserum	MR Egger	12	0.796692571635363	1.00704725473564	0.956000728728415	1.06081945629845
Diseases of pulp and periapiCalciuml tissues	ironserum	Weighted median	12	0.739573372954191	0.995150189341738	0.967029232867124	1.02408889585551
Diseases of pulp and periapiCalciuml tissues	ironserum	Inverse variance weighted	12	0.850427046289762	0.997879412054463	0.976102913010999	1.02014173682826
Diseases of pulp and periapiCalciuml tissues	ironserum	Simple mode	12	0.740894412876166	0.991709822875878	0.945126174591716	1.04058949929448
Diseases of pulp and periapiCalciuml tissues	ironserum	Weighted mode	12	0.608987064998895	0.987869955363363	0.943993483409143	1.03378578969135
Impacted teeth	ironserum	MR Egger	3	0.782737402159511	1.61352953551633e-17	3.47364414789108e-110	7.49494608871811e+75
Impacted teeth	ironserum	Weighted median	3	0.897911479713461	1.95115153334351	7.17146026920943e-05	53085.3154470365
Impacted teeth	ironserum	Inverse variance weighted	3	0.995234346601168	1.02532750083603	0.000279453286670315	3761.97573661366
Impacted teeth	ironserum	Simple mode	3	0.777556907533207	8.81546192183331	1.5975675854055e-05	4864418.23214432
Impacted teeth	ironserum	Weighted mode	3	0.77340563881417	7.80051471748665	3.78023079182775e-05	1609637.96150408
Cleft lip and cleft palate	ironserum	MR Egger	12	0.99181103295704	0.9999621470136	0.992936593886141	1.0070374096563
Cleft lip and cleft palate	ironserum	Weighted median	12	0.615537647611589	1.00113667919897	0.996707586453758	1.00558545360689
Cleft lip and cleft palate	ironserum	Inverse variance weighted	12	0.884738360285034	0.99975986750828	0.996518813801781	1.00301146233953
Cleft lip and cleft palate	ironserum	Simple mode	12	0.65250288357451	1.00167486410666	0.994601386034958	1.0087986478513
Cleft lip and cleft palate	ironserum	Weighted mode	12	0.634165246390311	1.00167486410666	0.994984148917895	1.00841057063502
Oral Calciumvity Calciumncer	ironserum	MR Egger	9	0.436433766230816	0.000384242594829028	2.97269817871411e-12	49666.1156985703
Oral Calciumvity Calciumncer	ironserum	Weighted median	9	0.215635470555519	0.00239507003124885	1.70210596173176e-07	33.7015472805823
Oral Calciumvity Calciumncer	ironserum	Inverse variance weighted	9	0.662430218661702	0.205169531128943	0.000167396140503397	251.466589236064
Oral Calciumvity Calciumncer	ironserum	Simple mode	9	0.405998844405546	0.000554332098739914	2.93289770468012e-11	10477.149448583
Oral Calciumvity Calciumncer	ironserum	Weighted mode	9	0.346250458396917	0.000291728819842563	3.47983191799111e-11	2445.68434143985
Oropharyngeal Calciumncer	ironserum	MR Egger	10	0.64871596177062	0.000867814634465396	1.80819779838432e-16	4164932843.43797
Oropharyngeal Calciumncer	ironserum	Weighted median	10	0.772424168396769	0.273831360634119	4.21891017895502e-05	1777.32188850026
Oropharyngeal Calciumncer	ironserum	Inverse variance weighted	10	0.494165820623713	8.12818567357882	0.0200105100874499	3301.63509353056
Oropharyngeal Calciumncer	ironserum	Simple mode	10	0.455413286486398	0.00217890283754263	4.46385447212743e-10	10635.6907580561
Oropharyngeal Calciumncer	ironserum	Weighted mode	10	0.379345842090957	0.00255183146796091	8.11369903520682e-09	802.573994009326
Mouth ulcers	ironserum	MR Egger	84	0.0848312277560504	0.698223166101067	0.466347708197572	1.04539076982803
Mouth ulcers	ironserum	Weighted median	84	0.523111111073699	0.902742201896335	0.659432288711264	1.23582587179238
Mouth ulcers	ironserum	Inverse variance weighted	84	0.114071727413693	0.836035133410217	0.669503626478515	1.04398948213714
Mouth ulcers	ironserum	Simple mode	84	0.00771894237386839	0.354347533974534	0.168273329625387	0.746179891450192
Mouth ulcers	ironserum	Weighted mode	84	0.391111718565462	0.862481556908202	0.616137059901867	1.20731974169071
Toothache	ironserum	MR Egger	13	0.606914554890819	0.415649156501618	0.0161310508745605	10.7100413137351
Toothache	ironserum	Weighted median	13	0.341758505412614	0.495906147402358	0.116794100028716	2.10561070268948
Toothache	ironserum	Inverse variance weighted	13	0.199576688477744	0.492184292907072	0.166614256295187	1.45392947500994
Toothache	ironserum	Simple mode	13	0.714467746177291	0.637949686073704	0.0607406692694087	6.70028511138761
Toothache	ironserum	Weighted mode	13	0.701750176136821	0.624194372745878	0.0592345121373379	6.57756096757025
Loose teeth	ironserum	MR Egger	16	0.34627315885506	0.0823066260262858	0.000542506745131248	12.4871824150167
Loose teeth	ironserum	Weighted median	16	0.508157159246691	0.636260872207456	0.166724027856208	2.42813170187646
Loose teeth	ironserum	Inverse variance weighted	16	0.48590876489876	0.707798507209922	0.267759721794525	1.87100107309283
Loose teeth	ironserum	Simple mode	16	0.785474132172617	1.44713721937241	0.105985170268171	19.7594260253015
Loose teeth	ironserum	Weighted mode	16	0.791945998419445	1.4118609895881	0.113888298754977	17.5026888250323
Bleeding gums	ironserum	MR Egger	38	0.283789587756227	1.78274803184632	0.629206590581365	5.05110816165387
Bleeding gums	ironserum	Weighted median	38	0.542961544673532	1.17700972775691	0.696202047499978	1.98987047540168
Bleeding gums	ironserum	Inverse variance weighted	38	0.777513286802643	1.05280155484215	0.736781527796882	1.50436876069945
Bleeding gums	ironserum	Simple mode	38	0.538114834297583	1.41855936618112	0.470903990731753	4.27329288981644
Bleeding gums	ironserum	Weighted mode	38	0.572066374727318	1.34866182219874	0.482263852420602	3.77156343260433
Painful gums	ironserum	MR Egger	8	0.475062085344324	0.0843380137888423	0.000145461447692313	48.8988710252112
Painful gums	ironserum	Weighted median	8	0.685080893802811	0.633947697097332	0.0700429592735409	5.73775989511662
Painful gums	ironserum	Inverse variance weighted	8	0.77124611479684	0.779580348325004	0.145500055784205	4.17694354973923
Painful gums	ironserum	Simple mode	8	0.584444892105762	0.334612984542043	0.00792070405629685	14.1358455799295
Painful gums	ironserum	Weighted mode	8	0.575521699758241	0.35406996902382	0.011065309609345	11.3296010134821
Dental caries	irontibc	MR Egger	16	0.164304731893886	37.484698359566	0.296496059284497	4739.02626057978
Dental caries	irontibc	Weighted median	16	0.293722778595614	6.54542066801133	0.196263432859918	218.290952608623
Dental caries	irontibc	Inverse variance weighted	16	0.144130657769829	6.61687512941138	0.524073477262001	83.5436983130026
Dental caries	irontibc	Simple mode	16	0.405170267211943	22.8752302898484	0.0177336233140442	29507.6
Dental caries	irontibc	Weighted mode	16	0.395691742344609	13.1874692154459	0.0406669656314011	4276.42784771846
Chronic periodontitis	irontibc	MR Egger	12	0.581695788646946	0.98831329098696	0.949114500620686	1.02913100632506
Chronic periodontitis	irontibc	Weighted median	12	0.453032551466202	0.989736052397533	0.963420360533718	1.01677055368934
Chronic periodontitis	irontibc	Inverse variance weighted	12	0.334856286563091	0.990614687376232	0.971810558486428	1.00978266831541
Chronic periodontitis	irontibc	Simple mode	12	0.667156326219064	0.99120547332258	0.95311728289216	1.03081573273266
Chronic periodontitis	irontibc	Weighted mode	12	0.612707151274086	0.990807315478364	0.956973759939397	1.02583704747308
Acute periodontitis	irontibc	MR Egger	8	0.306683113223417	0.995100782257849	0.986562713701675	1.00371274233015
Acute periodontitis	irontibc	Weighted median	8	0.137383590273901	0.993810434730593	0.985702945807755	1.00198460842587
Acute periodontitis	irontibc	Inverse variance weighted	8	0.491318017381934	0.998069495496998	0.992591909285417	1.00357730959017
Acute periodontitis	irontibc	Simple mode	8	0.559555550101065	0.995456120578725	0.981054543283687	1.01006910857463
Acute periodontitis	irontibc	Weighted mode	8	0.135137117047964	0.993657019208057	0.986345263381012	1.00102297692085
Diseases of pulp and periapical tissues	irontibc	MR Egger	11	0.257548272929002	1.0529285151088	0.968455195717667	1.1447700036424
Diseases of pulp and periapical tissues	irontibc	Weighted median	11	0.399069044244482	1.01553256446349	0.97979609754954	1.05257246080595
Diseases of pulp and periapical tissues	irontibc	Inverse variance weighted	11	0.934286765696808	1.0015485097169	0.965379318870576	1.03907282630592
Diseases of pulp and periapical tissues	irontibc	Simple mode	11	0.975054818377663	1.00086857205621	0.949130767374884	1.05542664189514
Diseases of pulp and periapical tissues	irontibc	Weighted mode	11	0.618647460850426	1.01351792347105	0.962897621172399	1.06679937576993
Impacted teeth	irontibc	MR Egger	3	0.349569230157701	2.58805049124559e+86	6.03712444666623e-18	1.10946948409113e+190
Impacted teeth	irontibc	Weighted median	3	0.983601803644377	0.873141654261904	2.10320009368571e-06	362483.983666625
Impacted teeth	irontibc	Inverse variance weighted	3	0.463495470813794	0.030735275117266	2.7812166219049e-06	339.656080398017
Impacted teeth	irontibc	Simple mode	3	0.844603620642094	5.81450360329937	1.06881954231807e-06	31631581.2110406
Impacted teeth	irontibc	Weighted mode	3	0.83967380129861	6.3968635732764	8.49109563260126e-07	48191500.0674355
Cleft lip and cleft palate	irontibc	MR Egger	12	0.499936584576323	1.00290666867668	0.994788262631956	1.01109132853558
Cleft lip and cleft palate	irontibc	Weighted median	12	0.190005380362114	0.996436569461215	0.99113099742032	1.00177054248518
Cleft lip and cleft palate	irontibc	Inverse variance weighted	12	0.292317694106793	0.997970753726627	0.994204759979818	1.00175101285364
Cleft lip and cleft palate	irontibc	Simple mode	12	0.0884480614022479	0.992643815183517	0.984987994094024	1.00035914115724
Cleft lip and cleft palate	irontibc	Weighted mode	12	0.516630347734096	0.997477393285697	0.9901351192432	1.00487411342052
Oral cavity cancer	irontibc	MR Egger	9	0.185482214666717	8.9976854716337e-08	3.53557406005728e-17	228.982175090222
Oral cavity cancer	irontibc	Weighted median	9	0.245005251625106	0.0010851366627648	1.09027293122649e-08	108.002459122936
Oral cavity cancer	irontibc	Inverse variance weighted	9	0.211097514715585	0.00481282625424906	1.12204784815201e-06	20.6437689727213
Oral cavity cancer	irontibc	Simple mode	9	0.508044788712616	0.00168034018811427	2.37548696328958e-11	118861.656217294
Oral cavity cancer	irontibc	Weighted mode	9	0.4576975055958	0.00039166704354813	1.08250821870033e-12	141710.769813749
Oropharyngeal cancer	irontibc	MR Egger	11	0.645313711246155	0.000769053184582332	1.16806544492984e-16	5063438896.19777
Oropharyngeal cancer	irontibc	Weighted median	11	0.767648989411174	3.77674681667847	0.000560489343366192	25448.8630089293
Oropharyngeal cancer	irontibc	Inverse variance weighted	11	0.707292951045196	3.67088693977349	0.00413796048591048	3256.5344619608
Oropharyngeal cancer	irontibc	Simple mode	11	0.517959586601652	103.049688936113	0.000133395125787319	79607394.4018061
Oropharyngeal cancer	irontibc	Weighted mode	11	0.5809635002512	33.6187	0.000191169706328611	5912110.47036196
Mouth ulcers	irontibc	MR Egger	84	0.216051227485996	0.739885493252836	0.460759243407687	1.1881053955148
Mouth ulcers	irontibc	Weighted median	84	0.275655490095637	0.840240343085031	0.614447687773951	1.14900559998101
Mouth ulcers	irontibc	Inverse variance weighted	84	0.367619698513951	0.886985579838163	0.683295982501372	1.15139476740486
Mouth ulcers	irontibc	Simple mode	84	0.940990938939837	1.02378212508939	0.550493458061343	1.90398237127778
Mouth ulcers	irontibc	Weighted mode	84	0.225017549669495	0.820049421837402	0.596609959775345	1.12717034510969
Toothache	irontibc	MR Egger	13	0.615795967347178	0.367149591741262	0.00818857396316379	16.4618190324916
Toothache	irontibc	Weighted median	13	0.721712301534961	1.36192952147911	0.248831668239257	7.45424420694253
Toothache	irontibc	Inverse variance weighted	13	0.158875240037747	2.47752789814959	0.70123466595671	8.75333862414678
Toothache	irontibc	Simple mode	13	0.653226897335722	0.448226228041023	0.014755066629071	13.6161195712969
Toothache	irontibc	Weighted mode	13	0.637591574853213	0.45954738511134	0.0196283360686818	10.7591289665978
Loose teeth	irontibc	MR Egger	16	0.442691516227212	0.0750784530876281	0.000121823548988338	46.2699877391587
Loose teeth	irontibc	Weighted median	16	0.444051327817531	1.8823960431232	0.372577319582145	9.51054902413252
Loose teeth	irontibc	Inverse variance weighted	16	0.81294096620771	1.14379177155875	0.375896394641961	3.48037287756274
Loose teeth	irontibc	Simple mode	16	0.375481026682075	4.47292195662169	0.179693411533495	111.33981295858
Loose teeth	irontibc	Weighted mode	16	0.36511029060878	3.9373348063562	0.221887420955451	69.8669861977279
Bleeding gums	irontibc	MR Egger	38	0.709192552920815	1.2368824710052	0.408246257566194	3.74743973453785
Bleeding gums	irontibc	Weighted median	38	0.541886885699719	1.19422499382449	0.675124886938051	2.11246
Bleeding gums	irontibc	Inverse variance weighted	38	0.303770204235734	1.24348147668302	0.820853410619126	1.88370562009061
Bleeding gums	irontibc	Simple mode	38	0.441902833836676	1.65037830890354	0.466617592000089	5.83721790433225
Bleeding gums	irontibc	Weighted mode	38	0.530170817963355	1.48132177638291	0.439384923158832	4.99405894360423
Painful gums	irontibc	MR Egger	8	0.257791359710455	0.00833536710718782	4.58496746270259e-06	15.1535088038847
Painful gums	irontibc	Weighted median	8	0.257269900061052	0.225027252629162	0.017042066821176	2.97131005042818
Painful gums	irontibc	Inverse variance weighted	8	0.191367530009453	0.269841258137992	0.0378173376299663	1.92542122626307
Painful gums	irontibc	Simple mode	8	0.450494025272034	0.184209851678553	0.0029059660691376	11.6771044974744
Painful gums	irontibc	Weighted mode	8	0.459267307769112	0.178145900506034	0.00237374879958602	13.369553624478
Dental caries	irontsat	MR Egger	16	0.8082416172524	1.81431643484443	0.0161630480370347	203.658624178074
Dental caries	irontsat	Weighted median	16	0.44159323221945	4.00433817763825	0.116904353288935	137.161053372073
Dental caries	irontsat	Inverse variance weighted	16	0.334446859501798	3.37789080161262	0.285192033246562	40.0086430806942
Dental caries	irontsat	Simple mode	16	0.263413270768493	58.2068632699919	0.0613434256030829	55230.6771006485
Dental caries	irontsat	Weighted mode	16	0.263508642346404	45.2536676391016	0.0728232555930861	28121.4348096887
Chronic periodontitis	irontsat	MR Egger	12	0.456935172168182	1.01535509713208	0.976912426658071	1.05531053259183
Chronic periodontitis	irontsat	Weighted median	12	0.320776275000744	1.0122309739771	0.988228073424621	1.03681687682472
Chronic periodontitis	irontsat	Inverse variance weighted	12	0.226104640652394	1.01146101951789	0.992968229581763	1.03029821451092
Chronic periodontitis	irontsat	Simple mode	12	0.560403326721759	1.01332972111355	0.970459775282344	1.05809344173314
Chronic periodontitis	irontsat	Weighted mode	12	0.436155246814833	1.01529546450464	0.978595122154451	1.05337218314991
Acute periodontitis	irontsat	MR Egger	8	0.0484426743505125	1.00919124751376	1.00189157904659	1.01654410053786
Acute periodontitis	irontsat	Weighted median	8	0.174832325884215	1.00513625136514	0.997725197628845	1.01260235404438
Acute periodontitis	irontsat	Inverse variance weighted	8	0.100413061419633	1.00457517267272	0.999119186080394	1.01006095329775
Acute periodontitis	irontsat	Simple mode	8	0.659769428774901	0.995954891935324	0.978885315476803	1.0133221237329
Acute periodontitis	irontsat	Weighted mode	8	0.0361830347113024	1.00983929747255	1.00237145562258	1.01736277604439
Diseases of pulp and periapical tissues	irontsat	MR Egger	12	0.835985662126707	0.992377088807485	0.924750364693557	1.06494933550674
Diseases of pulp and periapical tissues	irontsat	Weighted median	12	0.389059776314892	1.0166266247119	0.979185676084967	1.05549919623561
Diseases of pulp and periapical tissues	irontsat	Inverse variance weighted	12	0.497380803797581	1.00868685303892	0.983800712253999	1.03420251156606
Diseases of pulp and periapical tissues	irontsat	Simple mode	12	0.96712067993277	0.998441541746341	0.928620639926486	1.07351212047551
Diseases of pulp and periapical tissues	irontsat	Weighted mode	12	0.59473848467437	0.981434668106007	0.917792352925402	1.04949012125691
Impacted teeth	irontsat	MR Egger	3	0.423525770803447	1.14122905382984e-66	4.47965920777054e-168	2.90737239798546e+35
Impacted teeth	irontsat	Weighted median	3	0.294928609302126	0.00188939334561193	1.51133661856239e-08	236.201993030403
Impacted teeth	irontsat	Inverse variance weighted	3	0.443603498884887	0.0278298791206036	2.91773213428225e-06	265.446633283193
Impacted teeth	irontsat	Simple mode	3	0.411258036049431	0.000501612421120173	2.64076919181678e-10	952.80958972767
Impacted teeth	irontsat	Weighted mode	3	0.407096394597065	0.000472773057034319	2.60127074841043e-10	859.250670443129
Cleft lip and cleft palate	irontsat	MR Egger	12	0.991712320987983	1.00004316404573	0.992130506127994	1.00801892873715
Cleft lip and cleft palate	irontsat	Weighted median	12	0.461031722750271	0.998234963682696	0.993557061179978	1.00293489086088
Cleft lip and cleft palate	irontsat	Inverse variance weighted	12	0.784053766124834	0.999483843076761	0.995799925400628	1.00318138924301
Cleft lip and cleft palate	irontsat	Simple mode	12	0.529274736198159	0.997463954712056	0.98985114103191	1.00513531753129
Cleft lip and cleft palate	irontsat	Weighted mode	12	0.505883003296931	0.997630006178837	0.990906119896781	1.0044
Oral cavity cancer	irontsat	MR Egger	9	0.903895623842272	3.7403241880266	4.00908846769551e-09	3489577529.72173
Oral cavity cancer	irontsat	Weighted median	9	0.935940527825241	1.49715914066934	7.96408349783179e-05	28144.9270729019
Oral cavity cancer	irontsat	Inverse variance weighted	9	0.700556045674205	4.82266970873979	0.00158797306596475	14646.4342614439
Oral cavity cancer	irontsat	Simple mode	9	0.856426418318209	0.209376217342791	1.57699472775155e-08	2779869.8129625
Oral cavity cancer	irontsat	Weighted mode	9	0.881176578133792	0.295735694982638	5.6374671579934e-08	1551398.86115087
Oropharyngeal cancer	irontsat	MR Egger	12	0.953899385403549	2.50559179647001	1.61766122280713e-13	38809054467187
Oropharyngeal cancer	irontsat	Weighted median	12	0.637779995953969	8.53147475577641	0.00113525654736652	64114.1966344909
Oropharyngeal cancer	irontsat	Inverse variance weighted	12	0.288902973600663	28.298480816859	0.0587104843145933	13639.8809495612
Oropharyngeal cancer	irontsat	Simple mode	12	0.724428869297379	9.53083510113362	4.71355175601559e-05	1927141.62115801
Oropharyngeal cancer	irontsat	Weighted mode	12	0.768583864982772	6.14806486273933	4.60201048482915e-05	821351.921753677
Mouth ulcers	irontsat	MR Egger	83	0.205166522178013	0.767848558146165	0.511946044733555	1.15166708349901
Mouth ulcers	irontsat	Weighted median	83	0.584521853330065	0.904071284910643	0.629809413778154	1.29776543557332
Mouth ulcers	irontsat	Inverse variance weighted	83	0.381647337059869	0.910986779391227	0.739273487561055	1.12258443754492
Mouth ulcers	irontsat	Simple mode	83	0.096802972015469	0.525327465979725	0.247871164360778	1.11335639716044
Mouth ulcers	irontsat	Weighted mode	83	0.463208486486519	0.878025976691464	0.621262315243097	1.24090838415547
Toothache	irontsat	MR Egger	13	0.553743766168533	0.296571461831765	0.00600121725433717	14.6561319554736
Toothache	irontsat	Weighted median	13	0.163083376563064	0.29255161139966	0.0520100203183352	1.64557607954569
Toothache	irontsat	Inverse variance weighted	13	0.0460159504456874	0.279870143115651	0.0801092951441761	0.977755413608449
Toothache	irontsat	Simple mode	13	0.245449698622226	0.168610223885913	0.00968457812821896	2.9355339202665
Toothache	irontsat	Weighted mode	13	0.304509634652261	0.163476450970516	0.00597437170269601	4.47319841345926
Loose teeth	irontsat	MR Egger	16	0.87225865315481	1.55261820968789	0.00802229974279075	300.490306064758
Loose teeth	irontsat	Weighted median	16	0.610726086660681	1.4653075317327	0.336539217514137	6.38001769425988
Loose teeth	irontsat	Inverse variance weighted	16	0.691153919352532	1.23523293624973	0.435624566272475	3.50255822313237
Loose teeth	irontsat	Simple mode	16	0.573006003324564	2.33171221380716	0.130934849176492	41.5235659735546
Loose teeth	irontsat	Weighted mode	16	0.594592166026443	1.97086527760906	0.170832580776926	22.7375
Bleeding gums	irontsat	MR Egger	38	0.397042618519131	1.67807379532821	0.513731304556738	5.48133165643253
Bleeding gums	irontsat	Weighted median	38	0.921009744839552	0.970120432839988	0.532630404402627	1.76695443300721
Bleeding gums	irontsat	Inverse variance weighted	38	0.886240498651336	0.970994027826605	0.648753933261638	1.45329277209129
Bleeding gums	irontsat	Simple mode	38	0.878956509478201	1.10824693628874	0.297935835308156	4.1224019612244
Bleeding gums	irontsat	Weighted mode	38	0.963619909358008	1.03091369484389	0.281107148247641	3.78070444967988
Painful gums	irontsat	MR Egger	9	0.694370056747806	4.52836273309915	0.00328751230430794	6237.56419577508
Painful gums	irontsat	Weighted median	9	0.43422105316232	2.53716033932618	0.245967935236978	26.1708201162392
Painful gums	irontsat	Inverse variance weighted	9	0.388941216039144	2.17010098388986	0.372381936873026	12.6465271646232
Painful gums	irontsat	Simple mode	9	0.54621660604968	2.87128739184083	0.107924269631366	76.3895953588932
Painful gums	irontsat	Weighted mode	9	0.527755197211663	2.94139810035942	0.119461198800051	72.4237063724683
Dental caries	Magnesium	MR Egger	15	0.418834332061364	0.0881394148819246	0.000294421742011095	26.3858110568318
Dental caries	Magnesium	Weighted median	15	0.629410023515175	2.63964721805394	0.0512101400028453	136.061675195435
Dental caries	Magnesium	Inverse variance weighted	15	0.75082633936147	1.63470499862844	0.0787112083326933	33.9501894221442
Dental caries	Magnesium	Simple mode	15	0.759586700643729	2.82135020789595	0.00418117047758804	1903.77719307593
Dental caries	Magnesium	Weighted mode	15	0.790866691956953	2.70206102544646	0.00200210989319736	3646.71979797118
Chronic periodontitis	Magnesium	MR Egger	11	0.162586033409917	1.04512123967385	0.987342668940973	1.10628097010027
Chronic periodontitis	Magnesium	Weighted median	11	0.308720378082718	1.01679160788258	0.98470634413149	1.04992232458124
Chronic periodontitis	Magnesium	Inverse variance weighted	11	0.0670188223861933	1.02173886862027	0.998492856927689	1.04552607302731
Chronic periodontitis	Magnesium	Simple mode	11	0.824206872223057	0.994081192366379	0.944633209762914	1.04611759019629
Chronic periodontitis	Magnesium	Weighted mode	11	0.903016528769049	0.996852418024485	0.948766485953924	1.04737546913047
Acute periodontitis	Magnesium	MR Egger	8	0.244521408011995	0.994513157262308	0.986234406722873	1.00286140214307
Acute periodontitis	Magnesium	Weighted median	8	0.248505599169505	0.99498897967509	0.986535439562593	1.00351495746957
Acute periodontitis	Magnesium	Inverse variance weighted	8	0.197865	0.995891877412849	0.989671093195376	1.0021517636679
Acute periodontitis	Magnesium	Simple mode	8	0.89523524133746	0.999131981067077	0.986754858946441	1.0116643526406
Acute periodontitis	Magnesium	Weighted mode	8	0.256095553444603	0.994719624120163	0.986407665350925	1.00310162356428
Diseases of pulp and periapical tissues	Magnesium	MR Egger	11	0.955659294698969	0.997672921364324	0.921083733721597	1.08063058936233
Diseases of pulp and periapical tissues	Magnesium	Weighted median	11	0.577847	1.01173983852577	0.970995721422096	1.05419362647756
Diseases of pulp and periapical tissues	Magnesium	Inverse variance weighted	11	0.401049583509626	1.01362464974291	0.982108953117267	1.04615167930738
Diseases of pulp and periapical tissues	Magnesium	Simple mode	11	0.688104677828638	1.01307705513746	0.952542874170598	1.07745818847224
Diseases of pulp and periapical tissues	Magnesium	Weighted mode	11	0.734858990401761	1.01022003152531	0.954033336933871	1.06971577678289
Impacted teeth	Magnesium	MR Egger	3	0.734902310462551	9.20783942583778e-28	1.4200187995904e-147	5.97064679118807e+92
Impacted teeth	Magnesium	Weighted median	3	0.776758234226264	0.156826166021141	4.30313203535079e-07	57154.7564584212
Impacted teeth	Magnesium	Inverse variance weighted	3	0.870816217994726	0.410990387411673	9.11037250127657e-06	18540.745564589
Impacted teeth	Magnesium	Simple mode	3	0.76047873776614	0.0688503039792273	2.03926903313941e-08	232454.094138541
Impacted teeth	Magnesium	Weighted mode	3	0.76245131288536	0.0711758625122995	2.22928930931791e-08	227247.463269798
Cleft lip and cleft palate	Magnesium	MR Egger	12	0.720746769924782	0.998232709579149	0.988865313577236	1.0076888417382
Cleft lip and cleft palate	Magnesium	Weighted median	12	0.53891544573065	0.998037978189809	0.991805160287737	1.00430996509458
Cleft lip and cleft palate	Magnesium	Inverse variance weighted	12	0.922633963353812	0.999774855246984	0.99524181014072	1.00432854709229
Cleft lip and cleft palate	Magnesium	Simple mode	12	0.452294107577454	0.996169362863611	0.986598655881836	1.0058329124938
Cleft lip and cleft palate	Magnesium	Weighted mode	12	0.473205657456084	0.997072910678576	0.989389700731131	1.00481578540225
Oral cavity cancer	Magnesium	MR Egger	8	0.758997791482558	0.0124237974289439	2.9034274764017e-14	5316156294.92921
Oral cavity cancer	Magnesium	Weighted median	8	0.949674158158551	1.55337759877737	1.78389757767699e-06	1352646.02327985
Oral cavity cancer	Magnesium	Inverse variance weighted	8	0.937831861859105	1.53732961205054	3.11429373716569e-05	75888.228136064
Oral cavity cancer	Magnesium	Simple mode	8	0.952401629972479	0.487941147620365	6.52919926523509e-11	3646489467.83992
Oral cavity cancer	Magnesium	Weighted mode	8	0.937144206954921	0.418039460816558	3.45308690339337e-10	506089176.69597
Oropharyngeal cancer	Magnesium	MR Egger	12	0.469893408501056	98047.5784632299	9.25576477367637e-09	1038631369483784320
Oropharyngeal cancer	Magnesium	Weighted median	12	0.911277223806245	1.78447287379117	6.72168862542112e-05	47374.1587084748
Oropharyngeal cancer	Magnesium	Inverse variance weighted	12	0.662130634484674	5.30398819197953	0.00298174935721126	9434.82746885528
Oropharyngeal cancer	Magnesium	Simple mode	12	0.976535977551461	0.776185745370955	5.27277117593309e-08	11425952.145751
Oropharyngeal cancer	Magnesium	Weighted mode	12	0.978237726398477	0.776185745370955	1.44993749695334e-08	41551053.9304616
Mouth ulcers	Magnesium	MR Egger	86	0.274738365300168	1.29246818189085	0.818050287973046	2.04201871909283
Mouth ulcers	Magnesium	Weighted median	86	0.969248962612482	1.00770212357313	0.682205765564252	1.48850042188358
Mouth ulcers	Magnesium	Inverse variance weighted	86	0.0511690894773985	1.27199950169159	0.998774270780005	1.6199683748762
Mouth ulcers	Magnesium	Simple mode	86	0.285119346490969	1.59457712222413	0.681397416587524	3.73156125459715
Mouth ulcers	Magnesium	Weighted mode	86	0.638182317334382	1.09925732312428	0.742008829846673	1.62850711991131
Toothache	Magnesium	MR Egger	13	0.485380850978941	0.184771815521348	0.00188663471502801	18.0960434678253
Toothache	Magnesium	Weighted median	13	0.336265336077697	0.359101834830588	0.0445249612248589	2.8962210012369
Toothache	Magnesium	Inverse variance weighted	13	0.343073657453061	0.487523868118688	0.110407519732891	2.1527475896608
Toothache	Magnesium	Simple mode	13	0.623307670073284	0.397439175820817	0.0109960539980891	14.3649620586239
Toothache	Magnesium	Weighted mode	13	0.65798077178607	0.425855446586539	0.0106774566045797	16.9846498190998
Loose teeth	Magnesium	MR Egger	16	0.974097035299008	1.11634273775344	0.00163558596665456	761.941673224232
Loose teeth	Magnesium	Weighted median	16	0.678566868918423	0.684641784082372	0.114100219677179	4.10809351496141
Loose teeth	Magnesium	Inverse variance weighted	16	0.945496833897382	0.955949283971951	0.262718732255297	3.47839313048474
Loose teeth	Magnesium	Simple mode	16	0.689255318239154	0.509730452698018	0.0199702871856092	13.0105857764008
Loose teeth	Magnesium	Weighted mode	16	0.693072203043623	0.509730452698018	0.0191350979694736	13.5784585384526
Bleeding gums	Magnesium	MR Egger	40	0.121001821585242	3.49685773816546	0.744458215003551	16.4253866698339
Bleeding gums	Magnesium	Weighted median	40	0.989623581261709	0.99531783022553	0.490666356336866	2.01900450350976
Bleeding gums	Magnesium	Inverse variance weighted	40	0.96738390143095	0.987963900402159	0.552917247244009	1.76531420092796
Bleeding gums	Magnesium	Simple mode	40	0.981813719980782	0.98302534813406	0.227688163108397	4.24413294868577
Bleeding gums	Magnesium	Weighted mode	40	0.952005727503465	0.958598864966754	0.244054248907768	3.76519477955419
Painful gums	Magnesium	MR Egger	9	0.849478526526177	0.322190936177454	4.09697047690958e-06	25337.502415494
Painful gums	Magnesium	Weighted median	9	0.565686951247028	2.42859755921003	0.117613769150602	50.1479218563988
Painful gums	Magnesium	Inverse variance weighted	9	0.522300336886314	1.98678376456043	0.242540346874116	16.2748580926606
Painful gums	Magnesium	Simple mode	9	0.435270517321319	0.115741581528503	0.000673781063389402	19.8819979109106
Painful gums	Magnesium	Weighted mode	9	0.460248730667222	0.135382068340765	0.000865344595738715	21.1803534897877
Dental caries	VitaminB6	MR Egger	15	0.395182569887276	13.3396487540768	0.0414238754915472	4295.74072369096
Dental caries	VitaminB6	Weighted median	15	0.457558947519224	0.191350967187484	0.00243785211544912	15.0194478211162
Dental caries	VitaminB6	Inverse variance weighted	15	0.847039027061691	1.35305759459166	0.062666418974315	29.2144482523016
Dental caries	VitaminB6	Simple mode	15	0.436424319567017	0.0538698274800544	4.24279691746865e-05	68.3972947369397
Dental caries	VitaminB6	Weighted mode	15	0.445640703216369	0.0538698274800544	3.65593437621929e-05	79.3766521523788
Chronic periodontitis	VitaminB6	MR Egger	11	0.750545570820251	1.00979884347644	0.952609715141022	1.0704212733495
Chronic periodontitis	VitaminB6	Weighted median	11	0.0393559406745388	1.03687024080194	1.00176662364534	1.07320394878846
Chronic periodontitis	VitaminB6	Inverse variance weighted	11	0.0473094866436307	1.02386913611323	1.00027973555725	1.04801484086973
Chronic periodontitis	VitaminB6	Simple mode	11	0.0790711144080412	1.05875738197763	0.999858138608497	1.12112623842037
Chronic periodontitis	VitaminB6	Weighted mode	11	0.0775414515868363	1.05482590122451	1.00018753437827	1.11244905945136
Acute periodontitis	VitaminB6	MR Egger	8	0.0478075748705056	0.989345154211087	0.9810046491407	0.997756570285709
Acute periodontitis	VitaminB6	Weighted median	8	0.0589121062922544	0.992030342367542	0.983827617203341	1.00030145827311
Acute periodontitis	VitaminB6	Inverse variance weighted	8	0.0701786248570084	0.994154151539957	0.987864992346466	1.00048335013526
Acute periodontitis	VitaminB6	Simple mode	8	0.17020453782852	0.991019524374479	0.97962262553987	1.00254901437191
Acute periodontitis	VitaminB6	Weighted mode	8	0.074759840664413	0.991559413068525	0.983715692123794	0.999465676431509
Diseases of pulp and periapical tissues	VitaminB6	MR Egger	11	0.143342638592402	0.935970622208758	0.863236567826713	1.01483305769052
Diseases of pulp and periapical tissues	VitaminB6	Weighted median	11	0.546528930557895	1.01381479080961	0.969593399957577	1.06005303884011
Diseases of pulp and periapical tissues	VitaminB6	Inverse variance weighted	11	0.773085220152713	1.00471730838854	0.973084601093448	1.03737832110506
Diseases of pulp and periapical tissues	VitaminB6	Simple mode	11	0.534856942716755	1.02236458993368	0.955681162618888	1.09370090740931
Diseases of pulp and periapical tissues	VitaminB6	Weighted mode	11	0.677460563216692	1.01432402490305	0.950419582502848	1.08252528297674
Impacted teeth	VitaminB6	MR Egger	3	0.834733798567983	1.11669138572023e+25	1.58942460624199e-160	7.8456042900343e+209
Impacted teeth	VitaminB6	Weighted median	3	0.467060432323642	0.00422784128010876	1.6923357148412e-09	10562.1134938164
Impacted teeth	VitaminB6	Inverse variance weighted	3	0.982553634367754	1.12874432801345	2.17981386003727e-05	58448.2822767607
Impacted teeth	VitaminB6	Simple mode	3	0.561111163913699	0.00277047387592615	1.53457900439038e-10	50017.1413477564
Impacted teeth	VitaminB6	Weighted mode	3	0.538975168320373	0.00277047387592615	4.17029109258086e-10	18405.2511606309
Cleft lip and cleft palate	VitaminB6	MR Egger	12	0.633023584031695	0.997603514248459	0.988122319944868	1.0071756821528
Cleft lip and cleft palate	VitaminB6	Weighted median	12	0.911073405198096	0.999653048586929	0.993583813719559	1.00575935693654
Cleft lip and cleft palate	VitaminB6	Inverse variance weighted	12	0.742435493405897	0.999228554622981	0.994639876786517	1.00383840189451
Cleft lip and cleft palate	VitaminB6	Simple mode	12	0.364040926489349	0.995844934696704	0.987298829896292	1.00446501497956
Cleft lip and cleft palate	VitaminB6	Weighted mode	12	0.854998670929734	0.999289369657186	0.991874794192742	1.00675937140087
Oral cavity cancer	VitaminB6	MR Egger	8	0.382945794993381	453692.614889167	7.52582356609152e-07	273507592886434912
Oral cavity cancer	VitaminB6	Weighted median	8	0.491813001988557	0.00659524373637359	3.99397999179951e-09	10890.7005121418
Oral cavity cancer	VitaminB6	Inverse variance weighted	8	0.796061430874871	0.236158696865463	4.16625116760021e-06	13386.358109878
Oral cavity cancer	VitaminB6	Simple mode	8	0.510666913727988	0.000307630709530278	3.58538852903956e-14	2639509.01498123
Oral cavity cancer	VitaminB6	Weighted mode	8	0.517596238784072	0.000364886812347811	4.69425696473258e-14	2836282.4367228
Oropharyngeal cancer	VitaminB6	MR Egger	12	0.331192817434108	1.89509006143884e-07	2.3786584622679e-20	1509828.50120489
Oropharyngeal cancer	VitaminB6	Weighted median	12	0.94327388929093	0.691136448323645	2.63213388733218e-05	18147.617509137
Oropharyngeal cancer	VitaminB6	Inverse variance weighted	12	0.945595429299952	0.768062749954002	0.000392366287058675	1503.49407511326
Oropharyngeal cancer	VitaminB6	Simple mode	12	0.932683385900188	0.465907865206093	1.39833503350476e-08	15523471.3898885
Oropharyngeal cancer	VitaminB6	Weighted mode	12	0.94511480385563	0.541002657988012	2.0346602116303e-08	14384901.9250038
Mouth ulcers	VitaminB6	MR Egger	86	0.244736436498673	1.32140619156124	0.828939516108583	2.10644358142488
Mouth ulcers	VitaminB6	Weighted median	86	0.226389136166725	1.29895095853978	0.850251830946513	1.98443982274417
Mouth ulcers	VitaminB6	Inverse variance weighted	86	0.0691679095303999	1.25493791621691	0.982329377312884	1.60319869275093
Mouth ulcers	VitaminB6	Simple mode	86	0.0427989086045267	2.43993496811227	1.04275355565724	5.70919429266747
Mouth ulcers	VitaminB6	Weighted mode	86	0.154290905089032	1.3704006015423	0.891741273791168	2.1059895553823
Toothache	VitaminB6	MR Egger	13	0.77317766855897	0.496697030416817	0.00478351363121641	51.5746288282551
Toothache	VitaminB6	Weighted median	13	0.559724104654244	0.535475961003829	0.065641455406226	4.3681923723126
Toothache	VitaminB6	Inverse variance weighted	13	0.302255421289406	0.45309678710221	0.100686848153011	2.03896240917545
Toothache	VitaminB6	Simple mode	13	0.886641638526764	0.793980189158524	0.0355832204762937	17.7163430498427
Toothache	VitaminB6	Weighted mode	13	0.881137060579775	0.776254543353462	0.0300996694767168	20.0191937836062
Loose teeth	VitaminB6	MR Egger	16	0.184172284204165	96.1614201030259	0.158775913052516	58239.430266555
Loose teeth	VitaminB6	Weighted median	16	0.776547481387973	1.31157619653086	0.201530081000665	8.53585782710367
Loose teeth	VitaminB6	Inverse variance weighted	16	0.222106505854324	2.25894636493459	0.610627330132612	8.35671518099753
Loose teeth	VitaminB6	Simple mode	16	0.84680572431948	0.729851276950419	0.0315874948314063	16.8637269055136
Loose teeth	VitaminB6	Weighted mode	16	0.791138298848236	0.638222179930978	0.0243856258630895	16.703592240886
Bleeding gums	VitaminB6	MR Egger	39	0.54282127494614	1.57986766400211	0.367134984419544	6.79853988773564
Bleeding gums	VitaminB6	Weighted median	39	0.0541311951112153	0.506134125175655	0.253091190893445	1.01217174632987
Bleeding gums	VitaminB6	Inverse variance weighted	39	0.283659908891243	0.765373347501339	0.469438499220269	1.24786604004232
Bleeding gums	VitaminB6	Simple mode	39	0.191655842233696	0.324480305467517	0.0617286423236138	1.70565015968311
Bleeding gums	VitaminB6	Weighted mode	39	0.160035771419556	0.346700797118851	0.0814181563920192	1.47634689913747
Painful gums	VitaminB6	MR Egger	9	0.845813386410817	3.13456603395032	4.75309431188545e-05	206718.057258525
Painful gums	VitaminB6	Weighted median	9	0.948826240726539	1.1091377516564	0.0469014827677887	26.2291612024318
Painful gums	VitaminB6	Inverse variance weighted	9	0.586190555054994	1.8068335600984	0.214722357680092	15.2040409260118
Painful gums	VitaminB6	Simple mode	9	0.404763442326006	0.0778715774570338	0.000263529035372233	23.0106810320976
Painful gums	VitaminB6	Weighted mode	9	0.41838743362364	0.0817864135084958	0.000259836352151325	25.7431932799267

## Sheet: Supplementary Table S5
Supplementary Table S5. Sensitivity analysis results for Mendelian randomization (Forward MR).
Exposure	Outcome	method	Q	Q_pval	egger_intercept	se	pval	MR.PRESSO
Forward MR analysis
Vitamin A	Dental caries	MR Egger	19.7220334490232	0.00620243994558352	-6.57287e-05	0.000405627794016145	0.875850990381721	0.189
Vitamin A	Dental caries	Inverse variance weighted	19.7960124861781	0.0111359770352724
Vitamin A	Chronic periodontitis	MR Egger	8.8738852604395	0.180795892111971	-0.0779676	0.0588349379069314	0.233334389950617	0.148
Vitamin A	Chronic periodontitis	Inverse variance weighted	11.4711750029084	0.119346286519238
Vitamin A	Acute periodontitis	MR Egger	5.2172588450976	0.516265368749317	0.282194442527107	0.142061376878557	0.0941813526276553	0.24
Vitamin A	Acute periodontitis	Inverse variance weighted	9.16314793474218	0.241154024639301
Vitamin A	Diseases of pulp and periapical tissues	MR Egger	8.99032428533005	0.174122957989643	0.0318024693860261	0.0451772853494154	0.507850659890586	0.213
Vitamin A	Diseases of pulp and periapical tissues	Inverse variance weighted	9.7328397974449	0.204225439640399
Vitamin A	Impacted teeth	MR Egger	5.12648706852184	0.274563614224739	0.000491334515141137	0.000985008647792475	0.644095674984891	0.4
Vitamin A	Impacted teeth	Inverse variance weighted	5.44537224767918	0.363973201729914
Vitamin A	Cleft lip and cleft palate	MR Egger	10.0162832117447	0.123967970863761	-0.15026	0.259789418671187	0.584040755866686	0.185
Vitamin A	Cleft lip and cleft palate	Inverse variance weighted	10.5747528542097	0.158273694803915
Vitamin A	Oral cavity cancer	MR Egger	4.22332972090508	0.517730375585985	6.10949102894689e-05	0.000352375283310723	0.869153128755459	0.663
Vitamin A	Oral cavity cancer	Inverse variance weighted	4.25339042764088	0.642428170691637
Vitamin A	Oropharyngeal cancer	MR Egger	4.81061104060632	0.439428131860369	0.000479018073819256	0.000414221803708916	0.299753228941357	0.438
Vitamin A	Oropharyngeal cancer	Inverse variance weighted	6.1479388916149	0.406823726826477
Vitamin A	Mouth ulcers	MR Egger	7.89875876686894	0.341605930714485	0.00078250023576034	0.000868189568232464	0.397377376865913	0.355
Vitamin A	Mouth ulcers	Inverse variance weighted	8.81540263591854	0.35810703621841
Vitamin A	Toothache	MR Egger	2.62004766814189	0.854797911552232	-0.000766484	0.00065616074817585	0.287063902361721	0.758
Vitamin A	Toothache	Inverse variance weighted	3.98459	0.781551131477533
Vitamin A	Loose teeth	MR Egger	11.4772329513755	0.0747002915092272	-4.04815e-05	0.000907404731753073	0.965863916116691	0.139
Vitamin A	Loose teeth	Inverse variance weighted	11.4810400848449	0.118969234697197
Vitamin A	Bleeding gums	MR Egger	11.7616529844007	0.108674539871627	0.000805044256465778	0.00117801575987318	0.5163349176005	0.156
Vitamin A	Bleeding gums	Inverse variance weighted	12.5463601752729	0.128440492134158
Vitamin A	Painful gums	MR Egger	9.07251796675241	0.106206385827944	0.00147678137330288	0.00230768767369307	0.550379436707577	0.133
Vitamin A	Painful gums	Inverse variance weighted	9.81559901288771	0.132635430784713
Vitamin B9	Dental caries	MR Egger	2.32597427978797	0.676044120243945	3.03315414373244e-05	0.000356431659631955	0.936272774064374	0.82
Vitamin B9	Dental caries	Inverse variance weighted	2.33321591122355	0.801376253196027
Vitamin B9	Chronic periodontitis	MR Egger	7.84456186731783	0.097440932391914	0.0336009652445888	0.0911999076577398	0.731221655594018	0.172
Vitamin B9	Chronic periodontitis	Inverse variance weighted	8.11077128215625	0.150235541774093
Vitamin B9	Acute periodontitis	MR Egger	5.58447615331199	0.23240314757687	-0.378145	0.221919788324387	0.163592279384631	0.137
Vitamin B9	Acute periodontitis	Inverse variance weighted	9.6381244453629	0.0861627151125042
Vitamin B9	Diseases of pulp and periapical tissues	MR Egger	0.0739809245894022	0.999332492391341	0.00882854675266012	0.0494481238147799	0.86697570706844	1
Vitamin B9	Diseases of pulp and periapical tissues	Inverse variance weighted	0.105858024701976	0.999813247336497
Vitamin B9	Cleft lip and cleft palate	MR Egger	2.60218780427429	0.626435612893356	-0.310611	0.265096941264048	0.306350354945706	0.545
Vitamin B9	Cleft lip and cleft palate	Inverse variance weighted	3.97504093595025	0.553015031650386
Vitamin B9	Oral cavity cancer	MR Egger	2.60179302086313	0.626505530983457	5.73068063786076e-05	0.000138087160486722	0.699431995655848	0.725
Vitamin B9	Oral cavity cancer	Inverse variance weighted	2.77402183633381	0.734775919746273
Vitamin B9	Oropharyngeal cancer	MR Egger	3.28131118512799	0.511898776458376	0.000376461249087052	0.000162337349329773	0.0812252357792134	0.16
Vitamin B9	Oropharyngeal cancer	Inverse variance weighted	8.65909892655936	0.123458815580229
Vitamin B9	Mouth ulcers	MR Egger	2.71959828654575	0.605789546253345	-0.000367118	0.00121175527674268	0.77701984214888	0.735
Vitamin B9	Mouth ulcers	Inverse variance weighted	2.81138548339268	0.729036835037181
Vitamin B9	Toothache	MR Egger	1.80252112294589	0.772021065909859	0.000465659463828849	0.000795648320180825	0.589799833012052	0.846
Vitamin B9	Toothache	Inverse variance weighted	2.14504793072424	0.828732689526758
Vitamin B9	Loose teeth	MR Egger	0.4405772109553	0.979021952960049	-0.000200667	0.000795542547320922	0.813287034338523	0.991
Vitamin B9	Loose teeth	Inverse variance weighted	0.504201813828183	0.991968631676657
Vitamin B9	Bleeding gums	MR Egger	7.55996234284546	0.109094089360289	-0.000514852	0.00185243156906537	0.794838227282123	0.196
Vitamin B9	Bleeding gums	Inverse variance weighted	7.70595794364924	0.173202761247458
Vitamin B9	Painful gums	MR Egger	9.11617871781823	0.0582602666719137	-0.000289866	0.00101273712099844	0.788921662241453	0.12
Vitamin B9	Painful gums	Inverse variance weighted	9.30288225914427	0.0975761577479315
Vitamin B12	Dental caries	MR Egger	2.43519542590051	0.786221560985264	-0.000224213	0.00027157966050676	0.446626449361402	0.79
Vitamin B12	Dental caries	Inverse variance weighted	3.11678990621828	0.794052220856858
Vitamin B12	Chronic periodontitis	MR Egger	14.4605269161118	0.0248942215447596	0.0230404171638937	0.0584409160463396	0.707026547996746	0.057
Vitamin B12	Chronic periodontitis	Inverse variance weighted	14.835137043691	0.0381717405984887
Vitamin B12	Acute periodontitis	MR Egger	3.7361623254662	0.71232947474312	0.0191689293065387	0.107102001332697	0.863845544627993	0.846
Vitamin B12	Acute periodontitis	Inverse variance weighted	3.7681955412324	0.806056103973267
Vitamin B12	Diseases of pulp and periapical tissues	MR Egger	8.41976900021124	0.208934034268122	-0.00677879	0.033714318724438	0.847290086895795	0.301
Vitamin B12	Diseases of pulp and periapical tissues	Inverse variance weighted	8.47650058294243	0.292455176709639
Vitamin B12	Impacted teeth	Inverse variance weighted	0.156103422435883	0.692769637602415	/	/	/	/
Vitamin B12	Cleft lip and cleft palate	MR Egger	4.00131033996789	0.676499080958715	0.082097109647345	0.151067676010764	0.606408376599062	0.728
Vitamin B12	Cleft lip and cleft palate	Inverse variance weighted	4.29664378976881	0.74504587287866
Vitamin B12	Oral cavity cancer	MR Egger	5.0839713983018	0.165750603846116	0.000228538180166416	0.000300314539374522	0.502008952921492	0.233
Vitamin B12	Oral cavity cancer	Inverse variance weighted	6.06537276030758	0.194319099054614
Vitamin B12	Oropharyngeal cancer	MR Egger	0.345591478818074	0.986684131048147	-0.000161755	0.000158914523249901	0.366296057210902	0.925
Vitamin B12	Oropharyngeal cancer	Inverse variance weighted	1.38165686829308	0.926309249173718
Vitamin B12	Mouth ulcers	MR Egger	8.81049742584243	0.184519396653039	-0.000783649	0.00112839701485923	0.513360326825139	0.24
Vitamin B12	Mouth ulcers	Inverse variance weighted	9.51871813216323	0.217526409071766
Vitamin B12	Toothache	MR Egger	3.36329819805177	0.762059411674378	-0.000491567	0.0006114203503134	0.452079183322359	0.787
Vitamin B12	Toothache	Inverse variance weighted	4.00967613988119	0.778662232072752
Vitamin B12	Loose teeth	MR Egger	4.33992695834565	0.63077835348638	-0.000653397	0.000611344414472335	0.326267285262833	0.59
Vitamin B12	Loose teeth	Inverse variance weighted	5.4822325932239	0.601327813696006
Vitamin B12	Bleeding gums	MR Egger	12.254695128831	0.0924880916441348	-0.000835281	0.00114954998189009	0.491039280574277	0.109
Vitamin B12	Bleeding gums	Inverse variance weighted	13.1789973737907	0.105837482383247
Vitamin B12	Painful gums	MR Egger	3.46973707217955	0.627971661406355	-0.000214682	0.000617336846958272	0.742184911106139	0.742
Vitamin B12	Painful gums	Inverse variance weighted	3.59067107441618	0.731869828949113
Vitamin C	Dental caries	MR Egger	12.0743136851501	0.0981413554953183	-9.13631e-05	0.000153475962492902	0.570383757539854	0.192
Vitamin C	Dental caries	Inverse variance weighted	12.6855731538898	0.123135738267111
Vitamin C	Chronic periodontitis	MR Egger	9.15855030794899	0.102904794611143	-0.0270472	0.0610873941966676	0.67643570994918	0.152
Vitamin C	Chronic periodontitis	Inverse variance weighted	9.51763715488954	0.146490668116713
Vitamin C	Acute periodontitis	MR Egger	5.09813867261014	0.531289215686967	-0.00635433	0.0519680576299118	0.906674760330043	0.717
Vitamin C	Acute periodontitis	Inverse variance weighted	5.11308956829794	0.646164515228883
Vitamin C	Diseases of pulp and periapical tissues	MR Egger	0.927277730024865	0.92061518154816	-0.0210778	0.0154962336370641	0.245378837160856	0.6
Vitamin C	Diseases of pulp and periapical tissues	Inverse variance weighted	2.77739606482962	0.734257971211823
Vitamin C	Impacted teeth	MR Egger	2.50987837438608	0.473508484885639	-2.32549e-05	0.000321146164393477	0.946831357095453	0.717
Vitamin C	Impacted teeth	Inverse variance weighted	2.51512189851509	0.641930045420053
Vitamin C	Cleft lip and cleft palate	MR Egger	2.37800761696235	0.8818629450469	-0.109141	0.0740064245815756	0.190722336704187	0.665
Vitamin C	Cleft lip and cleft palate	Inverse variance weighted	4.55291419616321	0.714336500458219
Vitamin C	Oral cavity cancer	MR Egger	4.41682193206729	0.491088907347589	-4.0691e-05	0.000123322392819738	0.754808540221681	0.613
Vitamin C	Oral cavity cancer	Inverse variance weighted	4.5256930029408	0.605914407919857
Vitamin C	Oropharyngeal cancer	MR Egger	5.43897093624678	0.488863369707859	8.87472105171599e-05	5.32515995320752e-05	0.146650278034868	0.364
Vitamin C	Oropharyngeal cancer	Inverse variance weighted	8.21640724059045	0.313898833876453
Vitamin C	Mouth ulcers	MR Egger	15.3751407447308	0.0314802876420291	-7.20412e-05	0.00058933458152273	0.906143099547023	0.111
Vitamin C	Mouth ulcers	Inverse variance weighted	15.4079623016027	0.0516817460076358
Vitamin C	Toothache	MR Egger	3.38142784330643	0.847620317367635	-8.62706e-05	0.000261120829207421	0.750776867196186	0.896
Vitamin C	Toothache	Inverse variance weighted	3.49058248298911	0.899919312967061
Vitamin C	Loose teeth	MR Egger	15.7558949262495	0.0274425489609886	0.000388677924515187	0.000391711828451267	0.354126024330762	0.06
Vitamin C	Loose teeth	Inverse variance weighted	17.9720054380421	0.0214373476536717
Vitamin C	Bleeding gums	MR Egger	7.67198441901499	0.362404359382116	0.000776570317069002	0.000462947505575775	0.137354925466179	0.247
Vitamin C	Bleeding gums	Inverse variance weighted	10.7559374014149	0.21591526283649
Vitamin C	Painful gums	MR Egger	11.3310206466809	0.124817659553014	0.000107189185231847	0.000280112745302293	0.713322736537536	0.281
Vitamin C	Painful gums	Inverse variance weighted	11.5680527610599	0.171541595367925
Vitamin D	Dental caries	MR Egger	6.71199677473409	0.568000690750044	0.000270275353235197	0.000332507067408159	0.439826821211348	0.617
Vitamin D	Dental caries	Inverse variance weighted	7.37270714894932	0.598375650713097
Vitamin D	Chronic periodontitis	MR Egger	12.4291415185837	0.0873005257266873	-0.00584575	0.067087175875231	0.933003109723193	0.178
Vitamin D	Chronic periodontitis	Inverse variance weighted	12.4426232379075	0.132520706476225
Vitamin D	Acute periodontitis	MR Egger	7.38284733629154	0.390134728942646	0.163786949210819	0.147924848414016	0.304785342534309	0.401
Vitamin D	Acute periodontitis	Inverse variance weighted	8.67585818700175	0.370373518586107
Vitamin D	Diseases of pulp and periapical tissues	MR Egger	10.9670270153675	0.140063767489424	0.0328309627131405	0.0477571400499845	0.513920207369743	0.173
Vitamin D	Diseases of pulp and periapical tissues	Inverse variance weighted	11.7074527193175	0.164741645195018
Vitamin D	Cleft lip and cleft palate	MR Egger	4.68061211663447	0.698873451303239	0.00974288755461811	0.204195884087255	0.963277392203229	0.81
Vitamin D	Cleft lip and cleft palate	Inverse variance weighted	4.68288868875322	0.790869078873973
Vitamin D	Oral cavity cancer	MR Egger	3.67137864885742	0.816753991459869	-0.000146619	0.000167092161703865	0.409333064620263	0.828
Vitamin D	Oral cavity cancer	Inverse variance weighted	4.44133883201669	0.815272882053173
Vitamin D	Oropharyngeal cancer	MR Egger	1.05126749669103	0.993958587818618	-0.000172663	0.000196418918262792	0.408531971222103	0.988
Vitamin D	Oropharyngeal cancer	Inverse variance weighted	1.82400387723925	0.985940078887092
Vitamin D	Mouth ulcers	MR Egger	9.52966225839425	0.389884126613553	-0.000756429	0.00115937568206966	0.530423613244766	0.45
Vitamin D	Mouth ulcers	Inverse variance weighted	9.98039875645821	0.442214656478046
Vitamin D	Toothache	MR Egger	6.28134786406027	0.711462925641138	0.000322597068750328	0.000739873982792383	0.673096279690998	0.765
Vitamin D	Toothache	Inverse variance weighted	6.4714580217138	0.774221458236175
Vitamin D	Loose teeth	MR Egger	8.0517047469119	0.528944147553167	0.000513745860324114	0.000739780818334451	0.504925966067967	0.595
Vitamin D	Loose teeth	Inverse variance weighted	8.53397507005719	0.576825996227999
Vitamin D	Bleeding gums	MR Egger	4.20301774512047	0.897549304541882	-0.000634994	0.00125298719783651	0.624489038924659	0.924
Vitamin D	Bleeding gums	Inverse variance weighted	4.45984758917093	0.924227855942606
Vitamin D	Painful gums	MR Egger	7.50477903281097	0.584715440889544	0.000770234828874293	0.000623819092820137	0.248202632723967	0.539
Vitamin D	Painful gums	Inverse variance weighted	9.02928447897644	0.529326646841923
Vitamin E	Dental caries	MR Egger	11.5954004862042	0.170189428147285	-0.000211262	0.000273051666359166	0.461352304277217	0.201
Vitamin E	Dental caries	Inverse variance weighted	12.4630622508184	0.18844442342424
Vitamin E	Chronic periodontitis	MR Egger	9.4021310764215	0.401011776713016	-0.00816828	0.0227100483057985	0.727383938752989	0.5
Vitamin E	Chronic periodontitis	Inverse variance weighted	9.5372787567402	0.481982072126382
Vitamin E	Acute periodontitis	MR Egger	6.33821160295077	0.705649265422448	0.0753398955463058	0.0630985793299308	0.262996701053296	0.452
Vitamin E	Acute periodontitis	Inverse variance weighted	7.76385486273309	0.651890803294507
Vitamin E	Diseases of pulp and periapical tissues	MR Egger	2.45451179391497	0.982081881434695	-0.00159134	0.0168206282910233	0.92670004551205	0.998
Vitamin E	Diseases of pulp and periapical tissues	Inverse variance weighted	2.46346222835576	0.991397531320021
Vitamin E	Impacted teeth	MR Egger	0.101438375477134	0.95054555790576	-0.00198534	0.00112606016510575	0.219939982993759	0.452
Vitamin E	Impacted teeth	Inverse variance weighted	3.20991209117474	0.360379291371768
Vitamin E	Cleft lip and cleft palate	MR Egger	14.2204487230454	0.114696693026359	0.005462160172957	0.112647840197482	0.962385671685091	0.21
Vitamin E	Cleft lip and cleft palate	Inverse variance weighted	14.2241636811043	0.163010169853542
Vitamin E	Oral cavity cancer	MR Egger	4.20060123439002	0.520910684110224	-9.04183e-05	0.000154740655093905	0.584373181578254	0.586
Vitamin E	Oral cavity cancer	Inverse variance weighted	4.5420331290543	0.603738923832929
Vitamin E	Oropharyngeal cancer	MR Egger	2.99067996326145	0.810015683198525	0.000101238403721308	0.00014678109489279	0.516142853681041	0.858
Vitamin E	Oropharyngeal cancer	Inverse variance weighted	3.46639878189632	0.83877156881549
Vitamin E	Mouth ulcers	MR Egger	8.3515686713593	0.499141275829211	0.00074717847683457	0.0006907124525182	0.307494715149298	0.499
Vitamin E	Mouth ulcers	Inverse variance weighted	9.52175261503993	0.483403344909746
Vitamin E	Toothache	MR Egger	0.670061769758062	0.998555341838637	0.000618147936361019	0.000635620460296886	0.363194684778801	0.99
Vitamin E	Toothache	Inverse variance weighted	1.61583955838633	0.990613160260446
Vitamin E	Loose teeth	MR Egger	9.14599171654132	0.242343747365128	2.43523479296791e-05	0.000726461597765508	0.974194260116744	0.322
Vitamin E	Loose teeth	Inverse variance weighted	9.14745992972906	0.330009634668822
Vitamin E	Bleeding gums	MR Egger	12.8443697858501	0.169775740233988	0.000576562027947044	0.000917536244848433	0.545368859408629	0.221
Vitamin E	Bleeding gums	Inverse variance weighted	13.407898313339	0.201751201780877
Vitamin E	Painful gums	MR Egger	6.74459092222577	0.455948663536949	0.000976728944836918	0.000535918474089809	0.111155268940867	0.264
Vitamin E	Painful gums	Inverse variance weighted	10.0662163734612	0.260409129513648
calcium	Dental caries	MR Egger	255.298940763808	0.0200069406375559	2.92798571605142e-05	3.57058348006587e-05	0.413124355612606	0.419
calcium	Dental caries	Inverse variance weighted	256.112569132045	0.0206083504293451
calcium	Chronic periodontitis	MR Egger	206.945624983811	0.429319354231847	0.00311321746167645	0.00472770303118233	0.510955999528731	0.421
calcium	Chronic periodontitis	Inverse variance weighted	207.385515521389	0.440280317043424
calcium	Acute periodontitis	MR Egger	205.094203291931	0.465306924823276	0.0261273242668006	0.0134071702369499	0.0526956943882023	0.916
calcium	Acute periodontitis	Inverse variance weighted	208.912228938811	0.411038004106848
calcium	Diseases of pulp and periapical tissues	MR Egger	177.008898285841	0.914158144417678	0.00479745518031271	0.00355924517075235	0.179190062562232	0.767
calcium	Diseases of pulp and periapical tissues	Inverse variance weighted	178.82569377639	0.906394716434495
calcium	Impacted teeth	MR Egger	109.901065213078	0.755945597919055	4.62728189056372e-05	3.75593966888816e-05	0.220341397193408	0.839
calcium	Impacted teeth	Inverse variance weighted	111.418865739513	0.743770527001642
calcium	Cleft lip and cleft palate	MR Egger	185.377271483403	0.820780096520081	-0.0139888	0.0189307234361933	0.46078903854276	0.217
calcium	Cleft lip and cleft palate	Inverse variance weighted	185.923312936655	0.826354402288082
calcium	Oral cavity cancer	MR Egger	213.945327244544	0.167669180495565	4.92694218337295e-07	1.86530222745499e-05	0.978954425920326	0.635
calcium	Oral cavity cancer	Inverse variance weighted	213.946092708434	0.180471351621652
calcium	Oropharyngeal cancer	MR Egger	187.593341680664	0.635341046349067	2.33337891654559e-05	2.0932805581266e-05	0.266351138831277	0.082
calcium	Oropharyngeal cancer	Inverse variance weighted	188.835896789137	0.630268034314938
calcium	Mouth ulcers	MR Egger	305.384814295327	1.24587733906608e-05	1.28907041764836e-05	0.000133559657907141	0.923203339338296	0.246
calcium	Mouth ulcers	Inverse variance weighted	305.398491167581	1.52201083405929e-05
calcium	Toothache	MR Egger	237.670027444072	0.100374998088661	0.000150510933310725	7.64513198669154e-05	0.0502949453647379	0.575
calcium	Toothache	Inverse variance weighted	242.035769611803	0.0767923967090215
calcium	Loose teeth	MR Egger	307.593441197084	1.28908277644792e-05	0.000105041813261804	8.7456229579961e-05	0.231073597573848	0.201
calcium	Loose teeth	Inverse variance weighted	309.706447030534	1.10646746364715e-05
calcium	Bleeding gums	MR Egger	275.398241095486	0.00163454142251869	0.000185647018966109	0.000140104971505619	0.186592304129007	0.216
calcium	Bleeding gums	Inverse variance weighted	277.700799924814	0.00140234352031546
copper	Dental caries	Inverse variance weighted	2.38079392633749	0.122835106057401	/	/	/	/
copper	Chronic periodontitis	Inverse variance weighted	1.14689221980404	0.284200663037859
copper	Acute periodontitis	Inverse variance weighted	0.372280331274597	0.541763908486614	/	/	/	/
copper	Diseases of pulp and periapical tissues	Inverse variance weighted	2.98518446573192	0.0840297122450006
copper	Cleft lip and cleft palate	Inverse variance weighted	1.33157506574908	0.248525205168882	/	/	/	/
copper	Oral cavity cancer	Inverse variance weighted	0.739989329525304	0.389664296269297
copper	Oropharyngeal cancer	Inverse variance weighted	0.263727986735964	0.607570468317075	/	/	/	/
copper	Mouth ulcers	Inverse variance weighted	0.122421296183527	0.726423092430783
copper	Toothache	Inverse variance weighted	0.279690643596947	0.596904051558372	/	/	/	/
copper	Loose teeth	Inverse variance weighted	0.915703416740239	0.338605649465262
copper	Bleeding gums	Inverse variance weighted	1.49216028130107	0.221881582305721	/	/	/	/
copper	Painful gums	Inverse variance weighted	0.687770178673618	0.406923862689541
iron	Dental caries	Inverse variance weighted	0.241342540874285	0.623238138178468	/	/	/	/
iron	Chronic periodontitis	Inverse variance weighted	0.317574576632887	0.57306889428149
iron	Acute periodontitis	Inverse variance weighted	0.927419760723923	0.335534297390372	/	/	/	/
iron	Diseases of pulp and periapical tissues	Inverse variance weighted	0.227614796830618	0.633298088411533
iron	Cleft lip and cleft palate	Inverse variance weighted	0.770299421366252	0.380124439870322	/	/	/	/
iron	Oral cavity cancer	Inverse variance weighted	0.940460841699652	0.332159353143351
iron	Oropharyngeal cancer	Inverse variance weighted	1.19936698125997	0.273448235050126	/	/	/	/
iron	Mouth ulcers	Inverse variance weighted	0.618633731049711	0.431555453551831
iron	Toothache	Inverse variance weighted	3.10485596886577	0.0780591354403746	/	/	/	/
iron	Loose teeth	Inverse variance weighted	0.00186813360214451	0.965524638847968
iron	Bleeding gums	Inverse variance weighted	3.38251812539095	0.0658913115276596	/	/	/	/
iron	Painful gums	Inverse variance weighted	0.330476479320343	0.565378654404405
magnesium	Dental caries	MR Egger	3.34973235136347	0.340780591643017	-2.48256e-05	0.000265850892405948	0.931487243799969	0.53
magnesium	Dental caries	Inverse variance weighted	3.35946908175388	0.499565377700188
magnesium	Chronic periodontitis	MR Egger	1.6941887036692	0.638226551899582	0.00864675368662326	0.0360784533296332	0.826031537396195	0.842
magnesium	Chronic periodontitis	Inverse variance weighted	1.75162816428806	0.781319329736777
magnesium	Acute periodontitis	MR Egger	0.643690598094325	0.886361531826016	0.0315417444270056	0.102766817929724	0.778971141933023	0.947
magnesium	Acute periodontitis	Inverse variance weighted	0.737893785683493	0.946574935837873
magnesium	Diseases of pulp and periapical tissues	MR Egger	0.63392147294098	0.888624785835992	-0.00945899	0.0273023570618177	0.751877961632124	0.956
magnesium	Diseases of pulp and periapical tissues	Inverse variance weighted	0.753951284605333	0.94451273229377
magnesium	Impacted teeth	MR Egger	4.02616403642002	0.133576354848518	-0.00016039	0.000252878323839175	0.590782142536703	0.332
magnesium	Impacted teeth	Inverse variance weighted	4.83599638811205	0.184207810092238
magnesium	Cleft lip and cleft palate	MR Egger	0.303477654806533	0.959373105905874	-0.0263902	0.145693382005729	0.867808105713156	0.988
magnesium	Cleft lip and cleft palate	Inverse variance weighted	0.336287537821418	0.987352853662867
magnesium	Oral cavity cancer	MR Egger	0.185178774977189	0.979945724594832	2.14814778785507e-05	9.71889146411741e-05	0.839259584501498	0.989
magnesium	Oral cavity cancer	Inverse variance weighted	0.234032181113245	0.993664985933098
magnesium	Oropharyngeal cancer	MR Egger	2.82082	0.420084726180061	-0.000124059	0.000114241989504491	0.35697481028869	0.513
magnesium	Oropharyngeal cancer	Inverse variance weighted	4.00005447313225	0.405998477623255
magnesium	Mouth ulcers	MR Egger	3.04051508822491	0.385420631176338	0.000865076609433289	0.000858530138773325	0.387861226703258	0.392
magnesium	Mouth ulcers	Inverse variance weighted	4.06953541945129	0.396677042112251
magnesium	Toothache	MR Egger	3.31348156982091	0.345770664670557	0.00070638800073315	0.000588596537691394	0.31622097614239	0.283
magnesium	Toothache	Inverse variance weighted	4.90427769723858	0.297260965714142
magnesium	Loose teeth	MR Egger	3.55451467131547	0.31376027442225	0.000263565742856861	0.000609538729284369	0.694646610132444	0.486
magnesium	Loose teeth	Inverse variance weighted	3.7760456006883	0.437162331679926
magnesium	Bleeding gums	MR Egger	1.98830438443557	0.574837718675756	0.000345148531415265	0.000948472879016786	0.74006759424136	0.732
magnesium	Bleeding gums	Inverse variance weighted	2.12072701950077	0.713565474186899
magnesium	Painful gums	MR Egger	0.502118538245454	0.91842573212755	-0.000508997	0.000472210767088519	0.360027374478015	0.83
magnesium	Painful gums	Inverse variance weighted	1.66399205447157	0.797247642986759
phosphorus	Dental caries	MR Egger	0.356343162805408	0.836798832052926	-0.000269766	0.000597241060009407	0.695750686759113	0.872
phosphorus	Dental caries	Inverse variance weighted	0.56036419877016	0.905443029405859
phosphorus	Chronic periodontitis	MR Egger	4.80775561501493	0.0903668477289498	-0.0643599	0.134003832072082	0.678426433162643	0.301
phosphorus	Chronic periodontitis	Inverse variance weighted	5.36226508176328	0.147112748539885
phosphorus	Acute periodontitis	MR Egger	0.96293717841748	0.617875320149712	0.210643575803109	0.247432542608252	0.4842624044391	0.688
phosphorus	Acute periodontitis	Inverse variance weighted	1.6876781289429	0.639676695529075
phosphorus	Diseases of pulp and periapical tissues	MR Egger	1.08438173720727	0.581472925071433	0.105747279952674	0.0653886518001465	0.24722806852323	0.391
phosphorus	Diseases of pulp and periapical tissues	Inverse variance weighted	3.69975478738229	0.295763621245152
phosphorus	Impacted teeth	Inverse variance weighted	0.143023425124949	0.705293628408922	/	/	/	/
phosphorus	Cleft lip and cleft palate	MR Egger	2.15131536167889	0.341073364103771
phosphorus	Cleft lip and cleft palate	Inverse variance weighted	4.36661252879904	0.224501219798962	-0.523301	0.364646700329987	0.287731615358965	0.32
phosphorus	Oral cavity cancer	MR Egger	2.45087085782148	0.293629817572004
phosphorus	Oral cavity cancer	Inverse variance weighted	2.61365559068299	0.455100573353519	-9.2785e-05	0.000254575291084874	0.750435587200786	0.46
phosphorus	Oropharyngeal cancer	MR Egger	2.03056176033117	0.362300652472281
phosphorus	Oropharyngeal cancer	Inverse variance weighted	2.80898350392434	0.422023206690034	0.000238505817019791	0.000272385885930916	0.473579389031561	0.484
phosphorus	Mouth ulcers	MR Egger	5.91479857393016	0.0519538587021108
phosphorus	Mouth ulcers	Inverse variance weighted	9.83527893906875	0.0200194915969274	0.003996180071727	0.00347080640378892	0.368641108856288	0.137
phosphorus	Toothache	MR Egger	0.0179027090458877	0.9910885895775
phosphorus	Toothache	Inverse variance weighted	0.620595738382118	0.89170168499149	0.00102908048226988	0.00132556569771872	0.518787821639864	0.9
phosphorus	Loose teeth	MR Egger	5.44704004772773	0.0656432813531735
phosphorus	Loose teeth	Inverse variance weighted	7.17132088154698	0.0666330974546288	0.00174038094459183	0.00218728616244527	0.509651983732037	0.197
phosphorus	Bleeding gums	MR Egger	0.0206537951267836	0.989726241764476
phosphorus	Bleeding gums	Inverse variance weighted	2.7791851273737	0.426937887874139	-0.00372839	0.00224482291777796	0.238618195270022	0.484
phosphorus	Painful gums	MR Egger	4.28510742046205	0.117354769958326
phosphorus	Painful gums	Inverse variance weighted	6.20139366459974	0.102212678280847	0.00154715052240703	0.00163594325752227	0.444114250935478	0.23
phosphorus	Painful gums	Inverse variance weighted	1.66399205447157	0.797247642986759
selenium	Dental caries	MR Egger	6.2497041855323	0.282674303491364	-2.91755e-05	0.000417538265449796	0.947001724767984	0.508
selenium	Dental caries	Inverse variance weighted	6.25581	0.395153076798422
selenium	Chronic periodontitis	MR Egger	0.387108669094783	0.942892477370649	-0.0615282	0.102487656174434	0.590597413138902	0.92
selenium	Chronic periodontitis	Inverse variance weighted	0.747526154168646	0.945341225826609
selenium	Acute periodontitis	MR Egger	3.47507885439157	0.3240087226766	0.284068158600841	0.315048982515871	0.433693475136284	0.456
selenium	Acute periodontitis	Inverse variance weighted	4.41682176277605	0.352524512777892
selenium	Diseases of pulp and periapical tissues	MR Egger	0.985647336150082	0.804724821322885	-0.0198522	0.0778040201221719	0.815095266813581	0.874
selenium	Diseases of pulp and periapical tissues	Inverse variance weighted	1.05075188924689	0.902005154979613
selenium	Impacted teeth	Inverse variance weighted	0.0213591797394545	0.883804711748201	/	/	/	/
selenium	Cleft lip and cleft palate	MR Egger	1.70619091160467	0.635558292485651	0.315063516636624	0.413697076702693	0.501707320570238	0.607
selenium	Cleft lip and cleft palate	Inverse variance weighted	2.28619536499953	0.683283527390746
selenium	Oral cavity cancer	MR Egger	1.19393208128147	0.945458173706827	0.000136527444399112	0.000144263595976174	0.387413385136375	0.924
selenium	Oral cavity cancer	Inverse variance weighted	2.08955750879912	0.911280381239707
selenium	Oropharyngeal cancer	MR Egger	7.25465209300451	0.202379898174746	1.54016015690162e-07	0.000204271645884937	0.999427571036644	0.357
selenium	Oropharyngeal cancer	Inverse variance weighted	7.25465291783019	0.297937838483323
selenium	Mouth ulcers	MR Egger	2.01176790310238	0.733594309987647	-0.00202604	0.00129576801091003	0.192957679708433	0.589
selenium	Mouth ulcers	Inverse variance weighted	4.45655357994281	0.485717380465898
selenium	Toothache	MR Egger	0.286064743316161	0.997896984445882	-0.00138606	0.000831267186427045	0.156309878378287	0.768
selenium	Toothache	Inverse variance weighted	3.06628953671964	0.800482002926947
selenium	Loose teeth	MR Egger	6.73892515959885	0.240792010044189	-0.000787672	0.000964967701429408	0.451468561872587	0.373
selenium	Loose teeth	Inverse variance weighted	7.6369443013968	0.265926150201528
selenium	Bleeding gums	MR Egger	5.2184494699866	0.389806321873529	-0.000311244	0.00143828829680514	0.837228850734645	0.607
selenium	Bleeding gums	Inverse variance weighted	5.26732377786908	0.510012141703358
selenium	Painful gums	MR Egger	2.38491251558802	0.793718805396695	-1.92879e-05	0.000700881567312483	0.979110047455655	0.901
selenium	Painful gums	Inverse variance weighted	2.38566983440264	0.881037193807556
VitaminB6	Dental caries	Inverse variance weighted	0.988471029773872	0.320116355498722	/	/	/	/
VitaminB6	Chronic periodontitis	Inverse variance weighted	0.00268317863757942	0.958688527510219	/	/	/	/
VitaminB6	Acute periodontitis	Inverse variance weighted	0.945518433021037	0.33086267111254	/	/	/	/
VitaminB6	Diseases of pulp and periapical tissues	Inverse variance weighted	0.290872076414823	0.589662224499494	/	/	/	/
VitaminB6	Impacted teeth	Inverse variance weighted	0.419435999673678	0.517218603677392	/	/	/	/
VitaminB6	Cleft lip and cleft palate	Inverse variance weighted	0.299705766538194	0.584066937522902	/	/	/	/
VitaminB6	Oral cavity cancer	Inverse variance weighted	1.2341480750644	0.266601850338224	/	/	/	/
VitaminB6	Oropharyngeal cancer	Inverse variance weighted	1.08597991528467	0.297363649228379	/	/	/	/
VitaminB6	Mouth ulcers	Inverse variance weighted	0.759543438404905	0.383471440196164	/	/	/	/
VitaminB6	Toothache	Inverse variance weighted	0.00302371386074033	0.956147779694193	/	/	/	/
VitaminB6	Loose teeth	Inverse variance weighted	0.0217760760762518	0.882684348774493	/	/	/	/
VitaminB6	Bleeding gums	Inverse variance weighted	3.38155860321497	0.0659296800898985	/	/	/	/
VitaminB6	Painful gums	Inverse variance weighted	1.0889631419163	0.296701057301774	/	/	/	/
zinc	Dental caries	MR Egger	0.876892658340077	0.349054169963243	0.000684969907409769	0.000606531025752745	0.461382544981192	/
zinc	Dental caries	Inverse variance weighted	2.15226484619702	0.340911480593901
zinc	Chronic periodontitis	MR Egger	0.213606798200861	0.643955001514165	0.0476751314388931	0.0856175815608831	0.676547481302772	/
zinc	Chronic periodontitis	Inverse variance weighted	0.523675467759607	0.769635899407115
zinc	Acute periodontitis	MR Egger	3.28099913646459	0.070086250063895	0.19347312282998	0.442116216202171	0.737394220149636	/
zinc	Acute periodontitis	Inverse variance weighted	3.90930991541737	0.141613330853432
zinc	Diseases of pulp and periapical tissues	MR Egger	0.857911369604596	0.354323840717073	-0.073397	0.064832055708874	0.460604121575771	/
zinc	Diseases of pulp and periapical tissues	Inverse variance weighted	2.13958401930018	0.343079867300052
zinc	Cleft lip and cleft palate	MR Egger	0.67615168090619	0.410915037080093	-0.0643439	0.346895788931878	0.883243636708854	/
zinc	Cleft lip and cleft palate	Inverse variance weighted	0.710556285887928	0.700978443882949
zinc	Oral cavity cancer	MR Egger	0.0210407550983956	0.884667985881587	0.000134288868875696	0.000233143290518743	0.667315166491192	/
zinc	Oral cavity cancer	Inverse variance weighted	0.352808520876536	0.838279031780559
zinc	Oropharyngeal cancer	MR Egger	0.0268221391620209	0.869908540923235	0.000106639634276716	0.000274053485364389	0.763755597185908	/
zinc	Oropharyngeal cancer	Inverse variance weighted	0.178236349004169	0.914737468542066	/	/	/	/
zinc	Mouth ulcers	Inverse variance weighted	0.323417837556749	0.569560853277255	/	/	/	/
zinc	Toothache	Inverse variance weighted	1.53530188322365	0.21531846736426	/	/	/	/
zinc	Loose teeth	Inverse variance weighted	0.324798666270314	0.568737993324413	/	/	/	/
zinc	Bleeding gums	Inverse variance weighted	0.32645075387951	0.567756524762519	/	/	/	/
zinc	Painful gums	Inverse variance weighted	0.709171480661251	0.399718997505604	/	/	/	/

## Sheet: Supplementary Table S6
Supplementary Table S6. Sensitivity analysis results for Mendelian randomization (Reverse MR).
Outcome	Exposure	method	Q	Q_pval	egger_intercept	se	pval	MR.PRESSO
Reverse MR analysis
VitaminA	Dental caries	MR Egger	9.69050078702249	0.64309216035376	0.0171779055402515	0.0131826535042091	0.217000652339588	0.602
VitaminA	Dental caries	Inverse variance weighted	11.3884892936586	0.5783076183433
VitaminA	Chronic periodontitis	MR Egger	15.7251825408714	0.107774265826967	-0.000695568	0.0179222956387884	0.969805587538404	0.163
VitaminA	Chronic periodontitis	Inverse variance weighted	15.7275511178882	0.15155061199319
VitaminA	Acute periodontitis	MR Egger	9.59420409758252	0.142814196361237	-0.0089521	0.0144808595887278	0.559162247275954	0.241
VitaminA	Acute periodontitis	Inverse variance weighted	10.2053133039813	0.177234047995875
VitaminA	Diseases of pulp and periapical tissues	MR Egger	4.99083374805323	0.891789490693764	-0.00409698	0.0162400066653845	0.805936529977845	0.931
VitaminA	Diseases of pulp and periapical tissues	Inverse variance weighted	5.05447736881112	0.928499598489173
VitaminA	Cleft lip and cleft palate	MR Egger	8.00910135841382	0.627947884244676	-0.019127	0.0213141811130934	0.390607052240659	0.618
VitaminA	Cleft lip and cleft palate	Inverse variance weighted	8.81440034604918	0.639019343035691
VitaminA	Oral cavity cancer	MR Egger	10.9383648155856	0.0903001234456974	0.00809515928028668	0.0265106404870675	0.770411824219586	0.168
VitaminA	Oral cavity cancer	Inverse variance weighted	11.1083501717898	0.133962171170685
VitaminA	Oropharyngeal cancer	MR Egger	11.5021512734868	0.118165866692249	-0.0175413	0.0353896474949125	0.635313562345939	0.159
VitaminA	Oropharyngeal cancer	Inverse variance weighted	11.9058447738182	0.15545455833471
VitaminA	Mouth ulcers	MR Egger	69.5710461207416	0.813530728629833	-0.00276681	0.00375106279420873	0.462884394953606	0.839
VitaminA	Mouth ulcers	Inverse variance weighted	70.1151111153534	0.822352010575442
VitaminA	Toothache	MR Egger	1.32518663018248	0.999793050061812	-0.00603259	0.0170147018937291	0.729629226542036	1
VitaminA	Toothache	Inverse variance weighted	1.4508934167596	0.999890838493531
VitaminA	Loose teeth	MR Egger	19.2629805167864	0.11517289882925	0.0127610409835234	0.0277318589186924	0.653004667466059	0.146
VitaminA	Loose teeth	Inverse variance weighted	19.5767382044926	0.14406057075682
VitaminA	Bleeding gums	MR Egger	47.4296042194021	0.0963015406072228	0.00351432003426742	0.00992898279378227	0.725444315998134	0.115
VitaminA	Bleeding gums	Inverse variance weighted	47.5946559568397	0.113837037828097
VitaminA	Painful gums	MR Egger	3.53166040575545	0.831860759538143	-0.0108291	0.0278765202175514	0.709214858977428	0.896
VitaminA	Painful gums	Inverse variance weighted	3.6825672602801	0.884568181252696
VitaminB9	Dental caries	MR Egger	12.4680576958346	0.0861796094421806	-0.0166193	0.0331215751548416	0.631224831463489	0.123
VitaminB9	Dental caries	Inverse variance weighted	12.916499660577	0.114755070260354
VitaminB9	Chronic periodontitis	MR Egger	8.11351834326912	0.150089381004666	-0.00185376	0.0297068385905011	0.952660677475758	0.266
VitaminB9	Chronic periodontitis	Inverse variance weighted	8.11983710052779	0.229454581843822
VitaminB9	Diseases of pulp and periapical tissues	MR Egger	6.15686040420196	0.291253618839153	0.0464487451126604	0.0351073526695629	0.243092763761913	0.249
VitaminB9	Diseases of pulp and periapical tissues	Inverse variance weighted	8.31232606903772	0.216102771056255
VitaminB9	Cleft lip and cleft palate	MR Egger	8.62520458813652	0.280696064300827	0.0300611622862442	0.0328127975827483	0.390062516042493	0.278
VitaminB9	Cleft lip and cleft palate	Inverse variance weighted	9.65938517866826	0.289750895180388
VitaminB9	Oral cavity cancer	MR Egger	2.78594293984851	0.732945703793538	0.0278056582453838	0.0269745782654757	0.349888695210645	0.728
VitaminB9	Oral cavity cancer	Inverse variance weighted	3.84851167803622	0.697168143775922
VitaminB9	Oropharyngeal cancer	Inverse variance weighted	0.0139277213235537	0.906055164717228	/	/	/	/
VitaminB9	Mouth ulcers	MR Egger	63.1829235885458	0.23758268581393	0.00240455019261924	0.0054260475191917	0.659364895791756	0.277
VitaminB9	Mouth ulcers	Inverse variance weighted	63.4044942218013	0.260870380116412
VitaminB9	Toothache	MR Egger	4.04646955690114	0.670387726822237	0.00570631648919254	0.0223787118211521	0.807247064263245	0.777
VitaminB9	Toothache	Inverse variance weighted	4.11148874513023	0.766850298829875
VitaminB9	Loose teeth	MR Egger	11.9973928657794	0.100644638139886	0.00779202202211902	0.0399003402689432	0.850715710481735	0.171
VitaminB9	Loose teeth	Inverse variance weighted	12.0627564688967	0.148425731960349
VitaminB9	Bleeding gums	MR Egger	17.7870641078298	0.536701414707921	-0.020958	0.0130986075152964	0.126090842192483	0.459
VitaminB9	Bleeding gums	Inverse variance weighted	20.3471254846139	0.436412227067173
VitaminB9	Painful gums	MR Egger	1.33468732168605	0.720913169767686	0.0847648548149287	0.044946022808615	0.155780059377349	0.35
VitaminB9	Painful gums	Inverse variance weighted	4.89140267212507	0.298622850468982
VitaminB12	Dental caries	MR Egger	5.59273017786712	0.959728996095481	0.00149416533348217	0.00464276359814275	0.752700266847117	0.975
VitaminB12	Dental caries	Inverse variance weighted	5.69630260905116	0.973575310550199
VitaminB12	Chronic periodontitis	MR Egger	14.2361007105921	0.114171047808002	-0.000836399	0.00692732227985485	0.906550168835864	0.181
VitaminB12	Chronic periodontitis	Inverse variance weighted	14.2591599613967	0.161495331131486
VitaminB12	Acute periodontitis	MR Egger	0.604137967206549	0.996331128667705	0.0122810179320675	0.0040341321571847	0.0226779223723379	0.22
VitaminB12	Acute periodontitis	Inverse variance weighted	9.87176372670889	0.195957731812185
VitaminB12	Diseases of pulp and periapical tissues	MR Egger	3.03958877531167	0.96270468734986	0.00157525007378327	0.00682653386125919	0.822666008666596	0.98
VitaminB12	Diseases of pulp and periapical tissues	Inverse variance weighted	3.09283618917944	0.979154048958218
VitaminB12	Impacted teeth	MR Egger	0.0451909010905325	0.831653389743021	0.102803948243099	0.0852169582884032	0.440624990893293	/
VitaminB12	Impacted teeth	Inverse variance weighted	1.50054117348125	0.472238753906243
VitaminB12	Cleft lip and cleft palate	MR Egger	9.65825025660827	0.470970116368048	0.00770910335031885	0.00763111253729727	0.336208528507331	0.461
VitaminB12	Cleft lip and cleft palate	Inverse variance weighted	10.6787949281749	0.47055182861366
VitaminB12	Oral cavity cancer	MR Egger	3.20517102188028	0.78269010717017	0.00160320679318697	0.00701309846645571	0.826770657978638	0.879
VitaminB12	Oral cavity cancer	Inverse variance weighted	3.25742979572813	0.860210787552496
VitaminB12	Oropharyngeal cancer	MR Egger	8.4372132900455	0.586211098802336	0.00438086896322832	0.00821838267980926	0.605636915936536	0.681
VitaminB12	Oropharyngeal cancer	Inverse variance weighted	8.72136338570933	0.647594249205168
VitaminB12	Mouth ulcers	MR Egger	94.2459653072318	0.208561338609346	-0.000878871	0.00139735382868589	0.531086030849335	0.254
VitaminB12	Mouth ulcers	Inverse variance weighted	94.689799673593	0.221431953555393
VitaminB12	Toothache	MR Egger	8.39463643827603	0.6775772430614	-0.00142374	0.00603935514182339	0.817963452136549	0.763
VitaminB12	Toothache	Inverse variance weighted	8.45021137181477	0.749033034836797
VitaminB12	Loose teeth	MR Egger	13.986414537083	0.450723682005609	-0.00458363	0.00804531206728066	0.577891538222149	0.483
VitaminB12	Loose teeth	Inverse variance weighted	14.3110025071764	0.50208477152413
VitaminB12	Bleeding gums	MR Egger	53.2444181246603	0.0513293817570672	-0.00146835	0.00358682364995439	0.684563512576527	0.05
VitaminB12	Bleeding gums	Inverse variance weighted	53.4792361299147	0.0611594797709419
VitaminB12	Painful gums	MR Egger	1.88562441701886	0.965898555264593	0.000839654843779795	0.00999327823110762	0.935391390668848	0.986
VitaminB12	Painful gums	Inverse variance weighted	1.89268410711703	0.984126917749929
VitaminC	Dental caries	MR Egger	9.97501602504252	0.532635877489852	0.00339231441909891	0.00604115918945664	0.585692312101088	0.576
VitaminC	Dental caries	Inverse variance weighted	10.2903361114541	0.590506024866962
VitaminC	Chronic periodontitis	MR Egger	5.97422343516458	0.74249532933726	0.00084874996510766	0.00653354132558825	0.899497434444545	0.801
VitaminC	Chronic periodontitis	Inverse variance weighted	5.99109915295059	0.816010499720652
VitaminC	Acute periodontitis	MR Egger	2.59764913061999	0.76172242154174	0.00425033295013425	0.00474607745177646	0.411530669749408	0.731
VitaminC	Acute periodontitis	Inverse variance weighted	3.39965262634268	0.757269055943981
VitaminC	Diseases of pulp and periapical tissues	MR Egger	18.0219986038721	0.0349191728361557	0.00635345019567596	0.0116603819788682	0.599079359744507	0.06
VitaminC	Diseases of pulp and periapical tissues	Inverse variance weighted	18.6165017357423	0.0454129003468364
VitaminC	Impacted teeth	MR Egger	0.0234242649680197	0.878358942125454	-0.0498397	0.0996405134124817	0.704733505927478	/
VitaminC	Impacted teeth	Inverse variance weighted	0.273619212296323	0.872136259707536
VitaminC	Cleft lip and cleft palate	MR Egger	5.36907331103666	0.801021994384738	0.0066104122923676	0.00885524048051901	0.474414767885571	0.817
VitaminC	Cleft lip and cleft palate	Inverse variance weighted	5.92633139216553	0.821414100957433
VitaminC	Oral cavity cancer	MR Egger	6.17885646987718	0.403455815191993	-0.0110746	0.00825863439482196	0.228463261859148	0.376
VitaminC	Oral cavity cancer	Inverse variance weighted	8.03065939303039	0.329898156111517
VitaminC	Oropharyngeal cancer	MR Egger	13.1840491007945	0.213562737828255	0.00324850428178194	0.0112079073968224	0.777859192088646	0.289
VitaminC	Oropharyngeal cancer	Inverse variance weighted	13.294804939667	0.274494607014964
VitaminC	Mouth ulcers	MR Egger	104.246133482538	0.0665263348394001	-0.00152184	0.00168360819736856	0.368623708653815	0.081
VitaminC	Mouth ulcers	Inverse variance weighted	105.260136338705	0.0674061366427939
VitaminC	Toothache	MR Egger	16.7068159980601	0.116851983583836	0.00109429514736225	0.0086626958455897	0.901755879125704	0.721
VitaminC	Toothache	Inverse variance weighted	16.7310521584881	0.159997351265334
VitaminC	Loose teeth	MR Egger	19.3504817548201	0.15198465413397	0.000510690803654028	0.0107604426721579	0.962816984307437	0.179
VitaminC	Loose teeth	Inverse variance weighted	19.3536	0.198155480031371
VitaminC	Bleeding gums	MR Egger	56.6782366721525	0.0154461408541379	0.000686440473949261	0.00478558825233046	0.88674330982167	0.205
VitaminC	Bleeding gums	Inverse variance weighted	56.7106295054056	0.0200844313803017
VitaminC	Painful gums	MR Egger	6.89051519093638	0.440367821245077	-0.00887775	0.0112393635538559	0.45551749119764	0.469
VitaminC	Painful gums	Inverse variance weighted	7.51442512442179	0.482277630107756
VitaminD	Dental caries	MR Egger	8.06677299768347	0.839223066601468	0.0015577209663738	0.00466154138876768	0.743584951395818	0.886
VitaminD	Dental caries	Inverse variance weighted	8.17843881310348	0.879824006578271
VitaminD	Chronic periodontitis	MR Egger	12.4601659649237	0.188592357125546	-0.00245686	0.00650713951793375	0.714504823598911	0.286
VitaminD	Chronic periodontitis	Inverse variance weighted	12.6575269294996	0.243455054925936
VitaminD	Acute periodontitis	MR Egger	3.41806125736817	0.754837444532811	0.00514216411111483	0.00405050488458817	0.251274510135899	0.464
VitaminD	Acute periodontitis	Inverse variance weighted	5.02972169598577	0.65633600194464
VitaminD	Diseases of pulp and periapical tissues	MR Egger	4.46001735959074	0.878616850498408	-0.00261709	0.00685411132980164	0.711448736559721	0.934
VitaminD	Diseases of pulp and periapical tissues	Inverse variance weighted	4.60580925211762	0.915909359061462
VitaminD	Impacted teeth	MR Egger	0.965112968123334	0.325902022251073	0.152584741357124	0.0855639510473762	0.325356851424965	/
VitaminD	Impacted teeth	Inverse variance weighted	4.14521131130852	0.125857413003121
VitaminD	Cleft lip and cleft palate	MR Egger	11.5664477472859	0.315119465292011	0.00121123291780138	0.00823999184756592	0.886057719368287	0.405
VitaminD	Cleft lip and cleft palate	Inverse variance weighted	11.5914397906955	0.395122952716246
VitaminD	Oral cavity cancer	MR Egger	8.1201340857619	0.229433471615832	-0.00702385	0.00819161113167463	0.424119582847801	0.232
VitaminD	Oral cavity cancer	Inverse variance weighted	9.11513442658162	0.244495261857759
VitaminD	Oropharyngeal cancer	MR Egger	8.72306901338039	0.558571561463665	0.00242989553629428	0.00825161093045176	0.774416971846462	0.675
VitaminD	Oropharyngeal cancer	Inverse variance weighted	8.80978471084178	0.639444984424814
VitaminD	Mouth ulcers	MR Egger	107.081820828857	0.0455069389590766	-0.00140968	0.0014955089969874	0.348583329748941	0.051
VitaminD	Mouth ulcers	Inverse variance weighted	108.214484549684	0.0454926549739997
VitaminD	Toothache	MR Egger	3.69762368379698	0.977942584680048	-0.000879539	0.00606376986924369	0.887296457372701	0.988
VitaminD	Toothache	Inverse variance weighted	3.71866	0.987994752123615
VitaminD	Loose teeth	MR Egger	8.24982971645333	0.875908469871881	-0.00267117	0.00807781467061778	0.745783739561012	0.919
VitaminD	Loose teeth	Inverse variance weighted	8.35917845942088	0.908576951687897
VitaminD	Bleeding gums	MR Egger	43.1337163433055	0.26108146210598	0.000624455174480595	0.00324142723563252	0.848260401655528	0.295
VitaminD	Bleeding gums	Inverse variance weighted	43.1758436083373	0.297413323162153
VitaminD	Painful gums	MR Egger	1.28314781040978	0.988884781741275	0.00797729251119328	0.0100336465155204	0.452691987649381	0.982
VitaminD	Painful gums	Inverse variance weighted	1.91525894502654	0.983500454455643
VitaminE	Dental caries	MR Egger	11.7308021465298	0.549832046676835	0.00127350250796383	0.00466112319606487	0.788977988154141	0.631
VitaminE	Dental caries	Inverse variance weighted	11.8054501928138	0.621923243501078
VitaminE	Chronic periodontitis	MR Egger	8.34153028355494	0.500128075210498	-0.00281965	0.00552978175965084	0.622387827944466	0.591
VitaminE	Chronic periodontitis	Inverse variance weighted	8.60153134777518	0.570290118700726
VitaminE	Acute periodontitis	MR Egger	3.82036064432157	0.700971247852648	-0.00136851	0.00405006725153769	0.746948321408097	0.801
VitaminE	Acute periodontitis	Inverse variance weighted	3.93453633882579	0.787285951101484
VitaminE	Diseases of pulp and periapical tissues	MR Egger	6.89567384066971	0.647980405517462	-0.000226006	0.00685336230890909	0.974412409790002	0.757
VitaminE	Diseases of pulp and periapical tissues	Inverse variance weighted	6.89676134774556	0.735154052861893
VitaminE	Impacted teeth	MR Egger	3.57637971932625	0.0586067442250674	0.0633879216379939	0.161791883915876	0.762282340095753	/
VitaminE	Impacted teeth	Inverse variance weighted	4.12534285852767	0.127113940014957
VitaminE	Cleft lip and cleft palate	MR Egger	7.45712188146382	0.681699044265947	-0.00305012	0.00766073295655468	0.698887013176289	0.748
VitaminE	Cleft lip and cleft palate	Inverse variance weighted	7.61565	0.747263696522736
VitaminE	Oral cavity cancer	MR Egger	3.93364221679711	0.68565613488992	-0.00286846	0.00704090048272282	0.697851157389037	0.768
VitaminE	Oral cavity cancer	Inverse variance weighted	4.09961674852405	0.768234699693098
VitaminE	Oropharyngeal cancer	MR Egger	10.8132634911118	0.372250473831129	-0.00402464	0.00857977570149242	0.649068637371724	0.446
VitaminE	Oropharyngeal cancer	Inverse variance weighted	11.0511993792153	0.438983975448157
VitaminE	Mouth ulcers	MR Egger	77.1742923816098	0.687853628397332	-0.00229529	0.00132442336799373	0.086757281821471	0.644
VitaminE	Mouth ulcers	Inverse variance weighted	80.1777378697915	0.627667035688645
VitaminE	Toothache	MR Egger	7.66442991114159	0.743010924409435	0.00829842524270879	0.0060631966904524	0.198408398737312	0.673
VitaminE	Toothache	Inverse variance weighted	9.53764677065446	0.656450749466425
VitaminE	Loose teeth	MR Egger	22.5875940212072	0.0673200516944933	-0.00205465	0.0102589523436069	0.844142625080407	0.105
VitaminE	Loose teeth	Inverse variance weighted	22.6523101248319	0.0918061443346644
VitaminE	Bleeding gums	MR Egger	42.8099529935526	0.272312128644982	-0.00727998	0.00322886211898629	0.0299993653169341	0.146
VitaminE	Bleeding gums	Inverse variance weighted	48.5368866661564	0.140801845922946
VitaminE	Painful gums	MR Egger	10.1702280457298	0.179130299767521	0.0129056324590842	0.0120925641463741	0.321283052624401	0.173
VitaminE	Painful gums	Inverse variance weighted	11.8250620513254	0.159181516298786
calcium	Dental caries	MR Egger	0.122296352642253	0.726557133030783	-0.000959104	0.00485756971144071	0.875898712314577	/
calcium	Dental caries	Inverse variance weighted	0.161280971141183	0.92252529298759
calcium	Acute periodontitis	Inverse variance weighted	2.09316158009561	0.147959594566548	/	/	/	/
calcium	Cleft lip and cleft palate	Inverse variance weighted	0.0581966279869834	0.809369286741024	/	/	/	/
calcium	Oral cavity cancer	Inverse variance weighted	0.296708371374928	0.585953372946703	/	/	/	/
calcium	Oropharyngeal cancer	MR Egger	2.39585558908465	0.121657173059066	0.024996184146752	0.0102758971556334	0.248305520121849	/
calcium	Oropharyngeal cancer	Inverse variance weighted	16.5723408292326	0.000251977587067579
calcium	Mouth ulcers	MR Egger	18.6665568902565	0.0968994606402439	0.00129678402091311	0.00147753488766437	0.397356184277597	0.167
calcium	Mouth ulcers	Inverse variance weighted	19.8647940521261	0.0986332473221388
calcium	Toothache	Inverse variance weighted	0.176615909223955	0.674297750819782	/	/	/	/
calcium	Loose teeth	MR Egger	0.0824372899875928	0.774021244726397	-0.00406128	0.00723007646623489	0.674180143920658
calcium	Loose teeth	Inverse variance weighted	0.397966489586978	0.819563625175674
calcium	Bleeding gums	MR Egger	9.24686861720545	0.00981901655673575	0.00190470747372739	0.0103586619667984	0.871065422408629	0.074
calcium	Bleeding gums	Inverse variance weighted	9.40318839936342	0.0243838925308326
ironferritin	Dental caries	MR Egger	12.5853438593355	0.559401873652026	-0.000148462	0.00290899564014605	0.960018134150803	0.658
ironferritin	Dental caries	Inverse variance weighted	12.5879484968711	0.634090922581011
ironferritin	Chronic periodontitis	MR Egger	14.0146618974701	0.172323883325764	-0.00269584	0.00377258730205121	0.491208870884942	0.21
ironferritin	Chronic periodontitis	Inverse variance weighted	14.7302983772892	0.195179924714545
ironferritin	Acute periodontitis	MR Egger	5.72750605833461	0.454396660536964	-0.00237694	0.00254902607432632	0.387070180262415	0.515
ironferritin	Acute periodontitis	Inverse variance weighted	6.59703964726119	0.472004907982893
ironferritin	Diseases of pulp and periapical tissues	MR Egger	12.8797556148035	0.168123106597272	-0.00442293	0.00445460998787315	0.346706976475019	0.176
ironferritin	Diseases of pulp and periapical tissues	Inverse variance weighted	14.2905572666306	0.160146142213292
ironferritin	Impacted teeth	MR Egger	1.50733193383373	0.219546661412484	0.0804739576034845	0.0666547657007824	0.440379853980865	/
ironferritin	Impacted teeth	Inverse variance weighted	3.70446928691842	0.156886189608334
ironferritin	Cleft lip and cleft palate	MR Egger	18.644115679933	0.0450228431835032	-0.00465035	0.00658130109545778	0.495948877311347	0.076
ironferritin	Cleft lip and cleft palate	Inverse variance weighted	19.574986822448	0.0515214764069792
ironferritin	Oral cavity cancer	MR Egger	2.72697386873833	0.909059112954493	-0.00266905	0.00403735451723282	0.529704103554429	0.935
ironferritin	Oral cavity cancer	Inverse variance weighted	3.16401391139177	0.923646882676361
ironferritin	Oropharyngeal cancer	MR Egger	7.79287167794897	0.555147160502442	-0.00400896	0.00486636955465572	0.431337034569771	0.597
ironferritin	Oropharyngeal cancer	Inverse variance weighted	8.47153206653732	0.582879511100208
ironferritin	Mouth ulcers	MR Egger	7.79287167794897	0.555147160502442	-0.00400896	0.00486636955465572	0.431337034569771	0.579
ironferritin	Mouth ulcers	Inverse variance weighted	8.47153206653732	0.582879511100208
ironferritin	Toothache	MR Egger	6.59282629586146	0.831034264201049	-0.00208544	0.00363836314707072	0.578050846367371	0.88
ironferritin	Toothache	Inverse variance weighted	6.92136361637791	0.862766102398859
ironferritin	Loose teeth	MR Egger	13.5453994529772	0.484098144117328	0.00334432486663055	0.00507876265322663	0.520904835720271	0.554
ironferritin	Loose teeth	Inverse variance weighted	13.9790112421333	0.527121564126605
ironferritin	Painful gums	MR Egger	9.5525773300479	0.144802812068388	-0.00672311	0.008071875813776	0.436789900013127	0.208
ironferritin	Painful gums	Inverse variance weighted	10.6570652635416	0.154292920182945
ironserum	Dental caries	MR Egger	15.1521489278142	0.367833703297676	-0.00248267	0.00350129638884324	0.489921179508822	0.426
ironserum	Dental caries	Inverse variance weighted	15.6963071585588	0.402517313959557
ironserum	Chronic periodontitis	MR Egger	11.1739442986992	0.344127767836546	-0.000870309	0.00389001321527013	0.827472669172106	0.459
ironserum	Chronic periodontitis	Inverse variance weighted	11.2298750798376	0.424210971354085
ironserum	Acute periodontitis	MR Egger	3.65233862602815	0.723603650562276	-0.0047989	0.00291872763763416	0.151243671614079	0.467
ironserum	Acute periodontitis	Inverse variance weighted	6.35565679631634	0.498888072730027
ironserum	Diseases of pulp and periapical tissues	MR Egger	4.57768753624138	0.917548086359952	-0.00158208	0.00415781661926642	0.711525947534993	0.953
ironserum	Diseases of pulp and periapical tissues	Inverse variance weighted	4.72247411424126	0.943858472099822
ironserum	Impacted teeth	MR Egger	0.844247485711909	0.358184806569264	0.023092761165459	0.0649283361556849	0.782458758287856	/
ironserum	Impacted teeth	Inverse variance weighted	0.970745346203387	0.615467785730579
ironserum	Cleft lip and cleft palate	MR Egger	5.79756220386903	0.831974679393668	-0.000352139	0.005557871021303	0.950729581560508	0.869
ironserum	Cleft lip and cleft palate	Inverse variance weighted	5.80157650835756	0.886270015383209
ironserum	Oral cavity cancer	MR Egger	7.23245027151511	0.405085293794312	0.00349824268903439	0.00489432567089279	0.497898272066815	0.464
ironserum	Oral cavity cancer	Inverse variance weighted	7.76028937220137	0.457229303812494
ironserum	Oropharyngeal cancer	MR Egger	15.2160885499971	0.0550774611765894	0.00510217393666304	0.0079703014718892	0.539973087754356	0.087
ironserum	Oropharyngeal cancer	Inverse variance weighted	15.9955130670882	0.0669753458022093
ironserum	Mouth ulcers	MR Egger	119.356512826488	0.00446995299705697	0.00123126949406431	0.00117549412751111	0.297970441937002	0.827
ironserum	Mouth ulcers	Inverse variance weighted	120.953485852878	0.0041674289996113
ironserum	Toothache	MR Egger	7.49371465249707	0.757809213399784	0.000460284552220489	0.00425630521035817	0.915830553461617	0.459
ironserum	Toothache	Inverse variance weighted	7.50540930371247	0.822489568849744
ironserum	Loose teeth	MR Egger	14.0492570303415	0.446047831983547	0.00534220255606995	0.00624074564074152	0.406399920308894	0.167
ironserum	Loose teeth	Inverse variance weighted	14.7846052745696	0.467040975711636
ironserum	Bleeding gums	MR Egger	43.8352250471034	0.173316705936647	-0.00258227	0.00241160698770997	0.291401140509693	0.567
ironserum	Bleeding gums	Inverse variance weighted	45.2313041815391	0.165983731408797
ironserum	Painful gums	MR Egger	43.8352250471034	0.173316705936647	0.00527366640006799	0.00742526129248243	0.50421518459073	0.561
ironserum	Painful gums	Inverse variance weighted	45.2313041815391	0.165983731408797
irontibc	Dental caries	MR Egger	13.1636106848308	0.513683144256539	-0.00318483	0.00386214778249327	0.423411476170513	0.555
irontibc	Dental caries	Inverse variance weighted	13.8436197740116	0.537420971940641
irontibc	Chronic periodontitis	MR Egger	10.2167727028477	0.421685465257792	0.000556571999997896	0.00433816156865204	0.90045765198517	0.496
irontibc	Chronic periodontitis	Inverse variance weighted	10.2335895661652	0.509506191546036
irontibc	Acute periodontitis	MR Egger	8.21869302565446	0.222515187889256	0.0041388156250403	0.00405787919201714	0.347104911384193	0.224
irontibc	Acute periodontitis	Inverse variance weighted	9.64366211046785	0.209681963860423
irontibc	Diseases of pulp and periapical tissues	MR Egger	15.7960366160864	0.0712649883914302	-0.00846165	0.00653045008057448	0.227314185260111	0.06
irontibc	Diseases of pulp and periapical tissues	Inverse variance weighted	18.7426938333071	0.0436552270909665
irontibc	Impacted teeth	MR Egger	0.00717002405738647	0.932518980964157	-0.12057	0.0724492177325958	0.344457265543981	/
irontibc	Impacted teeth	Inverse variance weighted	2.77674352348714	0.249481188919892
irontibc	Cleft lip and cleft palate	MR Egger	8.06719788743027	0.622273124018699	-0.00870666	0.00647805030156504	0.208637598021939	0.578
irontibc	Cleft lip and cleft palate	Inverse variance weighted	9.87360134975225	0.541791458317448
irontibc	Oral cavity cancer	MR Egger	6.24712174846611	0.511208879287223	0.00603853492259557	0.0056531586063617	0.320890156565466	0.488
irontibc	Oral cavity cancer	Inverse variance weighted	7.38810908406414	0.495394877486654
irontibc	Oropharyngeal cancer	MR Egger	14.4742439254469	0.106427280953373	0.00492946554407468	0.00838240782678577	0.57094312603612	0.18
irontibc	Oropharyngeal cancer	Inverse variance weighted	15.030424063105	0.130956580586863
irontibc	Mouth ulcers	MR Egger	127.43944135391	0.000977577765981266	0.00125673959688021	0.00139700812782555	0.370970791776963	0.616
irontibc	Mouth ulcers	Inverse variance weighted	128.697157796618	0.000974352318187319
irontibc	Toothache	MR Egger	8.72594557363993	0.647172186787045	0.00519377042906186	0.0049791243806864	0.319280503603274	0.169
irontibc	Toothache	Inverse variance weighted	9.81402236822699	0.632272411877421
irontibc	Loose teeth	MR Egger	19.249247996326	0.155642283893155	0.00683318231012942	0.00805127719995974	0.410321296714178	0.891
irontibc	Loose teeth	Inverse variance weighted	20.2396287435142	0.162931692811478
irontibc	Bleeding gums	MR Egger	27.1366353742567	0.856513470215485	2.58267461271122e-05	0.00254506393034326	0.991959411214636	0.548
irontibc	Bleeding gums	Inverse variance weighted	27.1367383516739	0.882688384728057
irontibc	Painful gums	MR Egger	5.05323215412185	0.537004071680035	0.00838471278210943	0.00891138647508864	0.383077024823703	0.539
irontibc	Painful gums	Inverse variance weighted	5.9385226935809	0.546945863857564
irontsat	Dental caries	MR Egger	12.8538108538767	0.538065723148742	0.0011346724344384	0.00374602052948863	0.766419535303251	0.587
irontsat	Dental caries	Inverse variance weighted	12.945559719285	0.606502996979724
irontsat	Chronic periodontitis	MR Egger	8.14755469921239	0.61442652786419	-0.000920451	0.0041430798064904	0.828656418531441	0.705
irontsat	Chronic periodontitis	Inverse variance weighted	8.19691234042644	0.695563655717855
irontsat	Acute periodontitis	MR Egger	5.32082658666432	0.503371040985276	-0.00635439	0.00339453387160478	0.110380498740723	0.227
irontsat	Acute periodontitis	Inverse variance weighted	8.8250117798912	0.26546490372219
irontsat	Diseases of pulp and periapical tissues	MR Egger	14.1231733348718	0.167447071426527	0.00280665832402736	0.00562474220161546	0.628583817301618	0.185
irontsat	Diseases of pulp and periapical tissues	Inverse variance weighted	14.4748197031675	0.207823689497425
irontsat	Impacted teeth	MR Egger	7.99923256309763e-05	0.992863940982723	0.0882736511517096	0.0708770166557482	0.430686781654096	/
irontsat	Impacted teeth	Inverse variance weighted	1.55122115274478	0.460422572014135
irontsat	Cleft lip and cleft palate	MR Egger	4.22002336452117	0.936875917203607	-0.000985844	0.00632341004162071	0.879211107133296	0.949
irontsat	Cleft lip and cleft palate	Inverse variance weighted	4.24432937360192	0.96221697773164
irontsat	Oral cavity cancer	MR Egger	4.11506458795605	0.766432968141142	0.00014217293855106	0.00543233155428313	0.979850925812758	0.852
irontsat	Oral cavity cancer	Inverse variance weighted	4.11574954185565	0.846531962898205
irontsat	Oropharyngeal cancer	MR Egger	17.3151971598907	0.0676739895821636	0.00137323852916249	0.00845716023181503	0.874244080145848	0.107
irontsat	Oropharyngeal cancer	Inverse variance weighted	17.3608502609614	0.0976456353347972
irontsat	Mouth ulcers	MR Egger	92.0632898181939	0.188250839372249	0.00116647224260232	0.00117938384587153	0.325582921701193	0.181
irontsat	Mouth ulcers	Inverse variance weighted	93.1751237880261	0.187433955518938
irontsat	Toothache	MR Egger	12.1898072129155	0.349546519472565	-0.000158012	0.00510631374821928	0.975868143238845	0.445
irontsat	Toothache	Inverse variance weighted	12.1908683474422	0.430475137231793
irontsat	Loose teeth	MR Egger	14.4274745094018	0.418373475245056	-0.000578266	0.00665465107873248	0.931984437902957	0.502
irontsat	Loose teeth	Inverse variance weighted	14.4352560668037	0.492807052913403
irontsat	Bleeding gums	MR Egger	44.2801635216882	0.16183331718585	-0.00267322	0.00273224868160669	0.334407837319795	0.169
irontsat	Bleeding gums	Inverse variance weighted	45.4575967893721	0.16032550155125
irontsat	Painful gums	MR Egger	3.44537182720858	0.840977318635419	-0.0017224	0.00837427683967045	0.84289682484238	0.907
irontsat	Painful gums	Inverse variance weighted	3.48767486454385	0.900144095446365
Magnesium	Dental caries	MR Egger	4.31270745863353	0.987387416868435	0.00541416812447612	0.00456661003452778	0.257000024236318	0.973
Magnesium	Dental caries	Inverse variance weighted	5.71835236131745	0.973098738418324
Magnesium	Chronic periodontitis	MR Egger	12.3969894074785	0.191842647696384	-0.0056343	0.00635827406753919	0.398602579929765	0.214
Magnesium	Chronic periodontitis	Inverse variance weighted	13.478609309569	0.198128942279276
Magnesium	Acute periodontitis	MR Egger	2.40876174153313	0.878535679426516	0.0019472350222303	0.00396788037206104	0.641034071518236	0.929
Magnesium	Acute periodontitis	Inverse variance weighted	2.64959674243461	0.91541752418538
Magnesium	Diseases of pulp and periapical tissues	MR Egger	5.24831514182353	0.8121469912464	0.00284533877311846	0.00671414597260034	0.681672819070638	0.872
Magnesium	Diseases of pulp and periapical tissues	Inverse variance weighted	5.42790690155754	0.860824416455021
Magnesium	Impacted teeth	MR Egger	0.0454529569145361	0.831173315258008	0.0365681205007201	0.0838159274481943	0.738097757390002	/
Magnesium	Impacted teeth	Inverse variance weighted	0.235802644706188	0.888783751376787
Magnesium	Cleft lip and cleft palate	MR Egger	6.43932784336136	0.777101974659133	0.00274873252860173	0.00750484162941241	0.721800244212858	0.842
Magnesium	Cleft lip and cleft palate	Inverse variance weighted	6.57347513220238	0.83249854357266
Magnesium	Oral cavity cancer	MR Egger	4.18037558385172	0.652281408961091	0.00265827530554344	0.00689785754191538	0.713250305107261	0.73
Magnesium	Oral cavity cancer	Inverse variance weighted	4.32889097794648	0.741211513662642
Magnesium	Oropharyngeal cancer	MR Egger	10.8300906301577	0.37090792547316	-0.00559302	0.00841207574725546	0.521164595040588	0.434
Magnesium	Oropharyngeal cancer	Inverse variance weighted	11.3088518479248	0.417763182400874
Magnesium	Mouth ulcers	MR Egger	89.7097654967703	0.314869677201436	-0.00010952	0.00134090312171468	0.935098274294769	0.354
Magnesium	Mouth ulcers	Inverse variance weighted	89.7168900001038	0.342292884873106
Magnesium	Toothache	MR Egger	10.9082499312241	0.450981580141621	0.0026045886386733	0.00594035444996113	0.66954181512636	0.533
Magnesium	Toothache	Inverse variance weighted	11.1004942724331	0.520326527677441
Magnesium	Loose teeth	MR Egger	14.9025204086033	0.384850613307135	-0.000388516	0.00816399834701278	0.962716075427075	0.468
Magnesium	Loose teeth	Inverse variance weighted	14.904931109943	0.458286680953272
Magnesium	Bleeding gums	MR Egger	53.4823527469572	0.0490739164145284	-0.00608471	0.00353569032366081	0.0933957798950456	0.128
Magnesium	Bleeding gums	Inverse variance weighted	57.6506439704614	0.0274922731152726
Magnesium	Painful gums	MR Egger	12.5648897564657	0.0834466208793902	0.00430193108585663	0.0131692435609491	0.75347157439866	0.632
Magnesium	Painful gums	Inverse variance weighted	12.7564325780658	0.12050931680357
VitaminB6	Dental caries	MR Egger	11.1560489124371	0.59774667808875	-0.00424256	0.00462499571875256	0.375684483682905	0.556
VitaminB6	Dental caries	Inverse variance weighted	11.9975078126106	0.606502933887241
VitaminB6	Chronic periodontitis	MR Egger	12.7005817024627	0.176629196940344	0.00344565054467689	0.00651814709285639	0.609852650494758	0.249
VitaminB6	Chronic periodontitis	Inverse variance weighted	13.0949257126734	0.218412750685184
VitaminB6	Acute periodontitis	MR Egger	3.51387701309772	0.74212251314778	0.00681593181793749	0.00401862572017992	0.140798478071605	0.601
VitaminB6	Acute periodontitis	Inverse variance weighted	6.39058219568349	0.494953170695784
VitaminB6	Diseases of pulp and periapical tissues	MR Egger	5.22624180918312	0.814156995895742	0.0127141386653043	0.00680015200565823	0.0943460516603974	0.57
VitaminB6	Diseases of pulp and periapical tissues	Inverse variance weighted	8.72196186321246	0.558678059631091
VitaminB6	Impacted teeth	MR Egger	2.32023444659714	0.127700777847611	-0.0342979	0.129311188209207	0.834946401424801	/
VitaminB6	Impacted teeth	Inverse variance weighted	2.48346240422894	0.288883668769964
VitaminB6	Cleft lip and cleft palate	MR Egger	5.35084643662887	0.866543517737215	0.00289816863341785	0.0076011901928307	0.710972393873379	0.905
VitaminB6	Cleft lip and cleft palate	Inverse variance weighted	5.49621955447425	0.904779349947652
VitaminB6	Oral cavity cancer	MR Egger	4.98538029178718	0.545689573622241	-0.00798243	0.00698611097654356	0.296734572349819	0.509
VitaminB6	Oral cavity cancer	Inverse variance weighted	6.29094905383679	0.506217049289716
VitaminB6	Oropharyngeal cancer	MR Egger	10.3582253237848	0.409646815814333	0.00866137991957055	0.00833201733763139	0.323039839806331	0.366
VitaminB6	Oropharyngeal cancer	Inverse variance weighted	11.4775580501892	0.404164378654302
VitaminB6	Mouth ulcers	MR Egger	90.8976581214491	0.284548794981428	-0.000354078	0.00136705162875521	0.796262510790867	0.36
VitaminB6	Mouth ulcers	Inverse variance weighted	90.9702521191668	0.309078828692023
VitaminB6	Toothache	MR Egger	5.0032471533463	0.931009251390643	-0.000246638	0.00601607976100399	0.968033309628391	0.956
VitaminB6	Toothache	Inverse variance weighted	5.0049278693655	0.957814165838038
VitaminB6	Loose teeth	MR Egger	11.9096556247803	0.613558068278107	-0.00939563	0.00801430285911067	0.260616910453975	0.587
VitaminB6	Loose teeth	Inverse variance weighted	13.2840794928295	0.580365973292138
VitaminB6	Bleeding gums	MR Egger	44.6941294412791	0.18000476273347	-0.00352365	0.0033658765040297	0.301949130915664	0.188
VitaminB6	Bleeding gums	Inverse variance weighted	46.0179731132427	0.174301892628978
VitaminB6	Painful gums	MR Egger	11.8705317210027	0.104897698698847	-0.00130281	0.0129634820447934	0.922766408986142	0.166
VitaminB6	Painful gums	Inverse variance weighted	11.8876591198565	0.156287081426548
